# Supplementary material for: Pyrroloiminoquinone Alkaloids: Total Synthesis of Makaluvamines A and K
Source: PubMed Central journal article supplement — Org Lett. 2023 Mar 13;25(11):1868–71. doi: 10.1021/acs.orglett.3c00350 (PMC10044305; doi:10.1021/acs.orglett.3c00350), 2023-03-13
Supplement: ol3c00350_si_001.pdf [file ol3c00350_si_001.pdf]

# Pyrroloiminoquinone Alkaloids: Total Synthesis of Makaluvamines A and K

Jason An, Richard K. Jackson III, Joseph P. Tuccinardi and John L. Wood\*

Baylor University, Department of Chemistry and Biochemistry, One Bear Place #97348,  
Waco, TX, 76798

E-mail: John\_L\_Wood@baylor.edu

## Table of Contents

|                                                                                                                                                                                              |     |
|----------------------------------------------------------------------------------------------------------------------------------------------------------------------------------------------|-----|
| I. GENERAL INFORMATION .....                                                                                                                                                                 | S4  |
| II. EXPERIMENTAL SECTION .....                                                                                                                                                               | S5  |
| Preparation of Hydroquinone 14 .....                                                                                                                                                         | S6  |
| Preparation of Trimethoxy-nitrobenzene 15 .....                                                                                                                                              | S7  |
| Preparation of Iodo-nitrobenzene 16.....                                                                                                                                                     | S8  |
| Preparation of Iodoaniline 11.....                                                                                                                                                           | S9  |
| Preparation of Alkyne 12.....                                                                                                                                                                | S10 |
| Preparation of Indole 10 .....                                                                                                                                                               | S11 |
| Preparation of N-Methylated Indole 19 .....                                                                                                                                                  | S12 |
| Preparation Indoloquinone 20 .....                                                                                                                                                           | S13 |
| Preparation of Ts-Indoloquinone 21 .....                                                                                                                                                     | S14 |
| Preparation of Azidoindoloquinone 9 .....                                                                                                                                                    | S15 |
| Preparation of Vinylogous Imidate 6b .....                                                                                                                                                   | S16 |
| Preparation of Makaluvamine A (1).....                                                                                                                                                       | S18 |
| Preparation of Secondary Vinylogous Amidine 23 .....                                                                                                                                         | S19 |
| Preparation of Makaluvamine K (4) .....                                                                                                                                                      | S20 |
| III. SPECTRAL COMPARISONS FOR NATURAL PRODUCTS .....                                                                                                                                         | S21 |
| Table S1. Tabular collation of $^1\text{H}/^{13}\text{C}$ NMR data for synthetic and natural makaluvamine A (1) .....                                                                        | S22 |
| Figure SI. Stacked plots of (A) literature $^1\text{H}$ NMR for makaluvamine A (see ref. 2, main text, 500 MHz) and (B) synthetic makaluvamine A (1) $^1\text{H}$ NMR spectra (600 MHz)..... | S23 |
| Table S2. Tabular collation of $^1\text{H}/^{13}\text{C}$ NMR data for synthetic and natural makaluvamine K (4) .....                                                                        | S24 |
| .....                                                                                                                                                                                        | S24 |
| IV. SPECTRAL DATA FOR NEW COMPOUNDS .....                                                                                                                                                    | S25 |

|                                                                                                                |     |
|----------------------------------------------------------------------------------------------------------------|-----|
| Figure S2: $^1\text{H}$ NMR (400 MHz, $\text{CDCl}_3$ ) for hydroquinone 14 .....                              | S26 |
| Figure S3: $^{13}\text{C}$ NMR (101 MHz, $\text{CDCl}_3$ ) for hydroquinone 14 .....                           | S27 |
| Figure S4: $^1\text{H}$ NMR (500 MHz, $\text{CDCl}_3$ ) for trimethoxy arene 15 .....                          | S28 |
| Figure S5: $^{13}\text{C}$ NMR (126 MHz, $\text{CDCl}_3$ ) for trimethoxy arene 15 .....                       | S29 |
| Figure S6: $^1\text{H}$ NMR (500 MHz, $\text{CDCl}_3$ ) for aryl iodide 16 .....                               | S30 |
| Figure S7: $^{13}\text{C}$ NMR (126 MHz, $\text{CDCl}_3$ ) for aryl iodide 16 .....                            | S31 |
| Figure S8: $^1\text{H}$ NMR (300 MHz, $\text{CDCl}_3$ ) for iodoaniline 11 .....                               | S32 |
| Figure S9: $^{13}\text{C}$ NMR (76 MHz, $\text{CDCl}_3$ ) for iodoaniline 11 .....                             | S33 |
| Figure S10: $^1\text{H}$ NMR (500 MHz, $\text{CDCl}_3$ ) for alkyne 12 .....                                   | S34 |
| Figure S11: $^1\text{H}$ NMR (500 MHz, $\text{CDCl}_3$ ) for alkyne 12 (3.75-0.5 ppm inset).....               | S35 |
| Figure S12: $^{13}\text{C}$ NMR (126 MHz, $\text{CDCl}_3$ ) for alkyne 12 .....                                | S36 |
| Figure S13: $^1\text{H}$ NMR (500 MHz, $\text{CDCl}_3$ ) for trimethoxyindole 10 .....                         | S37 |
| Figure S14: $^1\text{H}$ NMR (500 MHz, $\text{CDCl}_3$ ) for trimethoxyindole 10 (4.0-0.75 ppm inset).....     | S38 |
| .....                                                                                                          |     |
| Figure S15: $^{13}\text{C}$ NMR (126 MHz, $\text{CDCl}_3$ ) for trimethoxyindole 10 .....                      | S39 |
| Figure S16: $^1\text{H}$ NMR (400 MHz, $\text{CDCl}_3$ ) for N-methylindole 19 .....                           | S40 |
| Figure S17: $^1\text{H}$ NMR (400 MHz, $\text{CDCl}_3$ ) for N-methylindole 19 (4.20-0.75 ppm inset)..         | S41 |
| Figure S18: $^{13}\text{C}$ NMR (101 MHz, $\text{CDCl}_3$ ) for N-methylindole 19 .....                        | S42 |
| Figure S19: $^1\text{H}$ NMR (300 MHz, $\text{CDCl}_3$ ) for crude indoloquinone 20.....                       | S43 |
| Figure S20: $^1\text{H}$ NMR (300 MHz, $\text{CDCl}_3$ ) for tosylate 21.....                                  | S44 |
| Figure S21: $^1\text{H}$ NMR (300 MHz, $\text{CDCl}_3$ ) for tosylate 21 (4.25-0.75 ppm inset) .....           | S45 |
| Figure S22: $^{13}\text{C}$ NMR (126 MHz, $\text{CDCl}_3$ ) for tosylate 21.....                               | S46 |
| Figure S23: $^1\text{H}$ NMR (400 MHz, $\text{CDCl}_3$ ) for azidoindoloquinone 9 .....                        | S47 |
| Figure S24: $^1\text{H}$ NMR (400 MHz, $\text{CDCl}_3$ ) for azidoindoloquinone 9 (4.10-0.75 ppm inset)        | S48 |
| .....                                                                                                          |     |
| Figure S25: $^{13}\text{C}$ NMR (101 MHz, $\text{CDCl}_3$ ) for azidoindoloquinone 9 .....                     | S49 |
| Figure S26: $^1\text{H}$ NMR (400 MHz, $\text{CDCl}_3$ ) for vinylogous imidate 6b .....                       | S50 |
| Figure S27: $^1\text{H}$ NMR (400 MHz, $\text{CDCl}_3$ ) for vinylogous imidate 6b (4.25-0.75 ppm inset)       | S51 |
| .....                                                                                                          |     |
| Figure S28: $^{13}\text{C}$ NMR (101 MHz, $\text{CDCl}_3$ ) for vinylogous imidate 6b .....                    | S52 |
| Figure S29: $^1\text{H}$ NMR (600 MHz, $\text{CD}_3\text{OD}$ ) for vinylogous amidine 22.....                 | S53 |
| Figure S30: $^1\text{H}$ NMR (600 MHz, $\text{CD}_3\text{OD}$ ) for vinylogous amidine 22 (4.0-0.75 ppm inset) | S54 |
| .....                                                                                                          |     |
| Figure S31: $^{13}\text{C}$ NMR (151 MHz, $\text{CD}_3\text{OD}$ ) for vinylogous amidine 22.....              | S55 |
| Figure S32: $^1\text{H}$ NMR (600 MHz, $\text{DMSO-d}_6$ ) for makaluvamine A trifluoroacetate (1).S56         |     |

|                                                                                                                                  |            |
|----------------------------------------------------------------------------------------------------------------------------------|------------|
| <b>Figure S33: <sup>1</sup>H NMR (600 MHz, DMSO-d6) for makaluvamine A trifluoroacetate (1) (10.5-5.0 ppm inset) .....</b>       | <b>S57</b> |
| <b>Figure S34: <sup>1</sup>H NMR (600 MHz, DMSO-d6) for makaluvamine A trifluoroacetate (1) (4.0-2.0 ppm inset) .....</b>        | <b>S58</b> |
| <b>Figure S35: <sup>13</sup>C NMR (151 MHz, DMSO-d6) for makaluvamine A trifluoroacetate (1).....</b>                            | <b>S59</b> |
| <b>Figure S36: <sup>1</sup>H NMR (500 MHz, CD<sub>3</sub>OD) for secondary vinylogous amidine 23 .....</b>                       | <b>S60</b> |
| <b>Figure S37: <sup>1</sup>H NMR (500 MHz, CD<sub>3</sub>OD) for secondary vinylogous amidine 23 (4.0- 0.75 ppm inset) .....</b> | <b>S61</b> |
| <b>Figure S38: <sup>13</sup>C NMR (126 MHz, CD<sub>3</sub>OD) for secondary vinylogous amidine 23 .....</b>                      | <b>S62</b> |
| <b>Figure S39: <sup>1</sup>H NMR (500 MHz, DMSO-d6) for makaluvamine K trifluoroacetate (4) .....</b>                            | <b>S63</b> |
| <b>Figure S40: <sup>1</sup>H NMR (500 MHz, DMSO-d6) for makaluvamine K trifluoroacetate (4) (10.5-5.25 ppm inset) .....</b>      | <b>S64</b> |
| <b>Figure S41: <sup>1</sup>H NMR (500 MHz, DMSO-d6) for makaluvamine K trifluoroacetate (4) (4.0-2.0 ppm inset) .....</b>        | <b>S65</b> |
| <b>Figure S42: <sup>13</sup>CNMR (125 MHz, DMSO-d6) for makaluvamine K trifluoroacetate (4) .....</b>                            | <b>S66</b> |
| <b>VI. REFERENCES.....</b>                                                                                                       | <b>S67</b> |

## I. GENERAL INFORMATION

Unless otherwise stated, all reactions were performed in flame- or oven-dried ( $\sim 120$  °C) glassware under a nitrogen ( $N_2$ ) atmosphere, using reagents as received from the manufacturers. The 3 Å molecular sieves (MS) were activated in the following manner: MS were oven-dried (120°C) overnight. The MS were then allowed to cool to room temperature (rt, usually 23°C) under a high vacuum ( $<1$  Torr). The MS were then heated in a microwave oven for 1 min. Again, MS were allowed to cool to rt under a high vacuum. Lastly, the MS were flame-dried under vacuum and used once they had returned to rt. Abbreviations for common solvents are as follows: EtOAc = ethyl acetate, MeCN = acetonitrile, MeOH = methanol, EtOH = ethanol, t-BuOH = tert-butyl alcohol, THF = tetrahydrofuran,  $CH_2Cl_2$  = methylene chloride,  $Et_2O$  = diethyl ether. The argon (Ar) used was ultra-high purity (UHP, 99.999%) as was the oxygen ( $O_2$ , 99.993%). The reactions were monitored, and, where noted, analytical samples purified by, normal phase thin layer chromatography (TLC) using Millipore glass-backed 60 Å plates (indicator F-254, 250  $\mu$ M). THF,  $CH_2Cl_2$ , MeCN, benzene, toluene, and  $Et_2O$  were dried using a solvent purification system manufactured by SG Water U.S.A., LLC. MeOH was simply dried with activated 4 Å molecular sieves (MS), degassed by sparging, and stored under Ar. Manual flash column chromatography was performed using the indicated solvent systems with Silicycle SiliaFlash P60® (230-400 mesh) silica gel as the stationary phase. All Medium Pressure Liquid Chromatography (MPLC) purifications were performed on either a Teledyne RF+ UV-Vis or a Teledyne CombiFlash NextGen 300+ RF using the indicated solvent systems and Teledyne RediSep® Rf normal phase disposable columns.  $^1H$  and  $^{13}C$  NMR spectra were recorded on either a Bruker Avance™ 300, Bruker Ascend™ 400 autosampler or a Bruker Ascend™ 600 autosampler. Chemical shifts ( $\delta$ ) are reported in parts per million (ppm) relative to the residual solvent resonance and coupling constants ( $J$ ) are reported in hertz (Hz). NMR spectra were calibrated relative to their respective residual NMR solvent peaks;  $CDCl_3$  = 7.26 ppm ( $^1H$  NMR) / 77.16 ppm ( $^{13}C$  NMR), Methanol- $d_4$  = 3.31 ppm ( $^1H$  NMR) / 49.00 ppm ( $^{13}C$  NMR), DMSO- $d_6$  = 2.50 ppm ( $^1H$  NMR) / 39.52 ppm ( $^{13}C$  NMR). NMR peak pattern abbreviations are as follows: s = singlet, br s = broad singlet, d = doublet, dd = doublet of doublets, ddd = doublet of doublet of doublets, t = triplet, dt = doublet of triplets, tt = triplet of triplets, q = quartet, m = multiplet. Infrared (IR) spectra were recorded on a Bruker Platinum-ATR IR spectrometer using a diamond window. High Resolution mass spectra (HRMS) were obtained in the Baylor University Mass Spectrometry Center on a Thermo Scientific LTQ Orbitrap Discovery spectrometer using positive electrospray ionization (+ESI) and reported for the molecular ion ( $[M+H]^+$ ,  $[M+Na]^+$ , or both). Optical rotations were obtained on a Rudolph Research Analytical Autopol IV Automatic Polarimeter using either Fisher Chemical Chloroform (HPLC grade; approx. 0.75% Ethanol as preservative) or Fisher Chemical Methanol (Optima® LC/MS). Melting points were taken on an Electrothermal Melting point measuring instrument 1101D Mel-Temp.

## **II. EXPERIMENTAL SECTION**

## Preparation of Hydroquinone 14

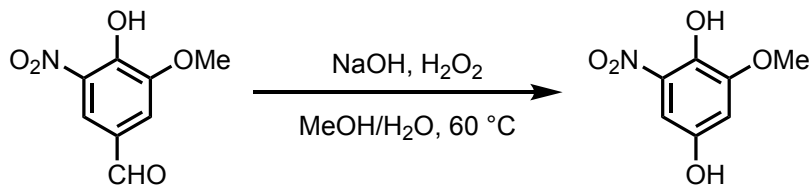

5-nitrovanillin (50.0 g, 253.0 mmol, 1.0 equiv) and MeOH/H<sub>2</sub>O (1000 mL, 1:1 mixture, 0.25 M with respect to 5-nitrovanillin) were added to a 2 L round-bottom flask. Aqueous 1M NaOH (280 mL, 280.0 mmol, 1.1 equiv) and aqueous H<sub>2</sub>O<sub>2</sub> (160 mL, 1,420 mmol, 5.6 equiv, 30% in H<sub>2</sub>O, d = ~1 g/mL) were added sequentially to the reaction mixture. The solution was placed in a heating mantle and stirred for 3 h at 60 °C, at which point complete consumption of starting material was observed by TLC. The solution was cooled to rt, concentrated *in vacuo*, and the precipitate that formed was filtered, washed with ice water (3 x 200 mL), and dried under vacuum to give hydroquinone **14** (45.5 g, 96% yield) as a bright orange solid.

**<sup>1</sup>H NMR:** (400 MHz, CDCl<sub>3</sub>) δ 10.46 (s, 1H), 7.10 (d, *J* = 2.8 Hz, 1H), 6.77 (d, *J* = 2.8 Hz, 1H), 5.00 (apparent s, 1H; exact chemical shift of this proton varied with concentration between 5.00-4.75), 3.93 (s, 3H).

**<sup>13</sup>C NMR:** (101 MHz, CDCl<sub>3</sub>) δ 151.0, 147.8, 141.6, 133.3, 108.3, 99.8, 56.9.

**HRMS** (ESI-): calculated for C<sub>7</sub>H<sub>6</sub>NO<sub>5</sub><sup>-</sup> [M-H]<sup>-</sup> 184.0251, found: 184.0243

**FTIR:** (thin film): 3445 (br), 1542, 1450, 1397, 1341, 1277, 1225, 1199, 1169, 1134, 1059, 989, 923, 812, 774, 762, 608 cm<sup>-1</sup>

**TLC:** R<sub>f</sub> = 0.13 (30% EtOAc/hexanes)

**Melting point:** 139-141 °C

## Preparation of Trimethoxy-nitrobenzene **15**

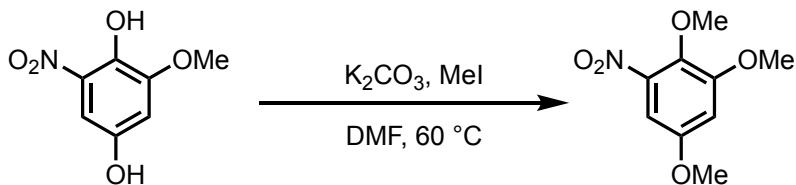

Hydroquinone **14** (45.5 g, 246.0 mmol, 1.0 equiv),  $\text{K}_2\text{CO}_3$  (101.9 g, 737.0 mmol, 3.0 equiv), and DMF (450 mL, 0.5 M with respect to **14**) were added to a flame-dried 1 L round-bottom flask. MeI (46 mL, 737.0 mmol, 3.0 equiv) was added in one portion and the solution was placed in a heating mantle (60 °C) and stirred for 2 h, at which point complete consumption of starting material was observed by TLC. The solution was cooled to rt and  $\text{H}_2\text{O}$  (500 mL) was added. The solution was extracted with EtOAc (3 x 300 mL) and the combined organic extracts were washed with  $\text{H}_2\text{O}$  (5 x 200 mL), brine (200 mL), dried ( $\text{MgSO}_4$ ) and concentrated *in vacuo* to give trimethoxy-nitrobenzene **15** (42.0 g, 80% yield) as a yellow solid.

**$^1\text{H NMR}$** : (500 MHz,  $\text{CDCl}_3$ )  $\delta$  6.81 (d,  $J = 2.9$  Hz, 1H), 6.67 (d,  $J = 2.9$  Hz, 1H), 3.91 (s, 3H), 3.88 (s, 3H), 3.81 (s, 3H).

**$^{13}\text{C NMR}$** : (126 MHz,  $\text{CDCl}_3$ ):  $\delta$  155.6, 155.0, 144.9, 137.5, 104.8, 98.9, 62.2, 56.5, 56.1.

**HRMS** (ESI+): calculated for  $\text{C}_9\text{H}_{11}\text{NNaO}_5^+$   $[\text{M}+\text{Na}]^+$  236.0529, found: 236.0529.

**FTIR** (thin film): 2944, 1620, 1584, 1531, 1499, 1456, 1430, 1360, 1282, 1240, 1218, 1196, 1152, 1062, 1048, 996, 946, 921, 841, 786, 769, 623  $\text{cm}^{-1}$

**TLC**:  $R_f = 0.21$  (20% EtOAc/hexanes)

**Melting point**: 79-81 °C

## Preparation of Iodo-nitrobenzene 16

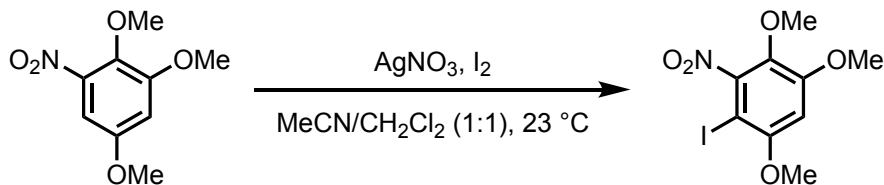

Trimethoxy-nitrobenzene **15** (35.0 g, 164.0 mmol, 1.0 equiv) and CH<sub>2</sub>Cl<sub>2</sub>/MeCN (1.60 L, 1:1 mixture, 0.1 M with respect to **15**) were added to a flame dried 2 L round-bottom flask. AgNO<sub>3</sub> (30.7 g, 180.0 mmol, 1.1 equiv) and I<sub>2</sub> (45.7 g, 180.0 mmol, 1.1 equiv) were added and the mixture was stirred in the dark for 3 h (Note: The reaction should be halted immediately after observing complete consumption of the starting material by TLC as unidentified byproducts were observed when the reaction was allowed to stir for longer periods). The mixture was filtered through a short bed of celite and washed with CH<sub>2</sub>Cl<sub>2</sub> until the washings were colorless. Saturated aqueous Na<sub>2</sub>S<sub>2</sub>O<sub>3</sub> (500 mL) was added to the filtrate and the layers were separated. The aqueous layer was extracted with CH<sub>2</sub>Cl<sub>2</sub> (3 x 200 mL) and the combined organic extracts were washed with H<sub>2</sub>O (500 mL), brine (500 mL), and concentrated *in vacuo*. The precipitate that formed was filtered and washed with hexanes (3 x 100 mL) to give iodo-nitrobenzene **16** (50.7 g, 91% yield) as a yellow solid.

**<sup>1</sup>H NMR:** (400 MHz, CDCl<sub>3</sub>) δ 6.55 (s, 1H), 3.94 (s, 3H), 3.90 (s, 3H), 3.84 (s, 3H).

**<sup>13</sup>C NMR:** (126 MHz, CDCl<sub>3</sub>) δ 155.7, 154.5, 151.5, 135.6, 98.0, 65.7, 62.6, 57.4, 56.7.

**HRMS:** (ESI<sup>+</sup>): calculated for C<sub>9</sub>H<sub>10</sub>INNaO<sub>5</sub><sup>+</sup> [M+Na]<sup>+</sup> 361.9496, found: 361.9496.

**FTIR:** (thin film): 2977, 2945, 2847, 1596, 1567, 1533, 1490, 1464, 1435, 1369, 1328, 1279, 1241, 1208, 1092, 1052, 999, 919, 836, 819, 763, 745, 745, 584 cm<sup>-1</sup>.

**TLC:** R<sub>f</sub> = 0.34 (20% EtOAc/hexanes).

**Melting point:** 166-172 °C



## Preparation of Iodoaniline **11**

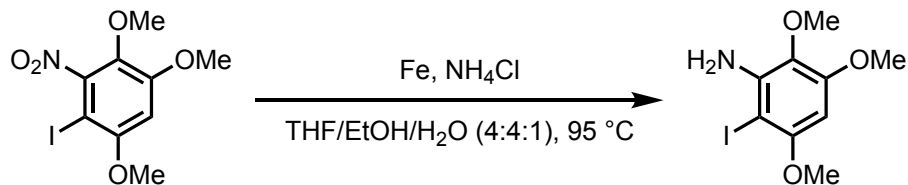

Iodo-nitrobenzene **16** (15.0 g, 44.2 mmol, 1.0 equiv), Fe powder (24.7 g, 442.0 mmol, 10 equiv), NH<sub>4</sub>Cl (11.8 g, 221.0 mmol, 5.0 equiv) and THF/EtOH/H<sub>2</sub>O (295 mL, 4:4:1 mixture, 0.15 M with respect to **16**) were added to a 1 L round-bottom flask. The mixture was placed in a heating mantle and stirred for 1h at reflux (mantle temp = 95 °C), at which point full consumption of starting material was observed by TLC. The mixture cooled to rt and filtered through a short bed of celite. The filtrate was washed with CH<sub>2</sub>Cl<sub>2</sub> (3 x 200 mL), dried (Na<sub>2</sub>SO<sub>4</sub>), and concentrated *in vacuo*. The crude mixture was purified by flash column chromatography on silica gel (hexanes/EtOAc 70:30) to give iodoaniline **11** (11.5 g, 85% yield) as a white amorphous solid. Due to the instability of this product, it was used immediately or stored in the freezer (-20 °C) under Ar.

**<sup>1</sup>H NMR:** (300 MHz, CDCl<sub>3</sub>) δ 6.00 (s, 1H), 4.39 (br s, 2H), 3.86 (s, 3H), 3.83 (s, 3H), 3.77 (s, 3H).

**<sup>13</sup>C NMR:** (75 MHz, CDCl<sub>3</sub>) δ 155.1, 153.2, 142.3, 129.9, 87.1, 65.7, 60.3, 56.7, 56.1.

**HRMS:** (ESI+): calculated for C<sub>9</sub>H<sub>13</sub>INO<sub>3</sub><sup>+</sup> [M+H]<sup>+</sup> 309.9935, found: 309.9932.

**FTIR:** (thin film): 3468, 3365, 2934, 2839, 1600, 1576, 1485, 1460, 1425, 1342, 1228, 1203, 1176, 1115, 1056, 1000, 975, 952, 773, 577, 416 cm<sup>-1</sup>.

**TLC:** R<sub>f</sub> = 0.24 (20% EtOAc/hexanes; stains yellow with Vanillin).

## Preparation of Alkyne **12**

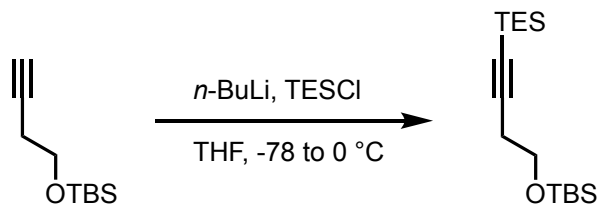

The TBS-protected alkyne **18** was prepared according to a literature protocol.<sup>1</sup> TBS-protected alkyne **18** (20 g, 108.0 mmol, 1.0 equiv) and THF (120 mL, 0.9 M with respect to **18**) were added to a flame-dried 500 mL round-bottom flask under Ar. The solution was cooled to  $-78$  °C and  $n\text{-BuLi}$  (48 mL, 119.0 mmol, 1.1 equiv, 2.5 M in hexanes) was added dropwise. The solution was stirred for 0.5 h at  $-78$  °C and warmed to  $0$  °C. After stirring for 0.5 h at  $0$  °C, the solution was once again cooled to  $-78$  °C and  $\text{TESCl}$  (15.1 mL, 119.0 mmol, 1.1 equiv) was added dropwise. The reaction stirred for an additional 0.5 h and quenched with saturated  $\text{NaHCO}_3$  (100 mL) at  $-78$  °C. After warming to rt, the organic and aqueous layers were separated, and the aqueous layer was further extracted with  $\text{Et}_2\text{O}$  (3 x 50 mL). The combined organic extracts were washed with brine (100 mL), dried ( $\text{MgSO}_4$ ), filtered, and concentrated *in vacuo* to give the crude silylated alkyne **12** (31.6 g) as a pale-yellow liquid. This material was carried forward without further purification. For characterization purposes, the crude material could be purified by flash column chromatography on silica gel (hexanes/ $\text{EtOAc}$ / $\text{Et}_3\text{N}$  90:6:4).

**<sup>1</sup>H NMR:** (500 MHz,  $\text{CDCl}_3$ )  $\delta$  3.72 (t,  $J = 7.1$  Hz, 2H), 2.46 (t,  $J = 7.1$  Hz, 2H), 0.98 (t,  $J = 8.0$  Hz, 9H), 0.90 (s, 9H), 0.57 (q,  $J = 7.9$  Hz, 6H), 0.07 (s, 6H).

**<sup>13</sup>C NMR:** (126 MHz,  $\text{CDCl}_3$ )  $\delta$  105.4, 82.9, 62.2, 26.0, 24.5, 18.5, 7.6, 4.6, -5.1.

**HRMS** (ESI+): calculated for  $\text{C}_{16}\text{H}_{34}\text{NaOSi}_2$   $[\text{M}+\text{H}]^+$  321.2040, found: 321.2041.

**FTIR** (thin film): 2954, 2931, 2875, 2176, 1462, 1415, 1382, 1361, 1253, 1106, 1046, 1006, 916, 835, 776, 724, 608  $\text{cm}^{-1}$ .

**TLC:**  $R_f = 0.15$  (hexanes;  $\text{KMnO}_4$ ).

## Preparation of Indole 10

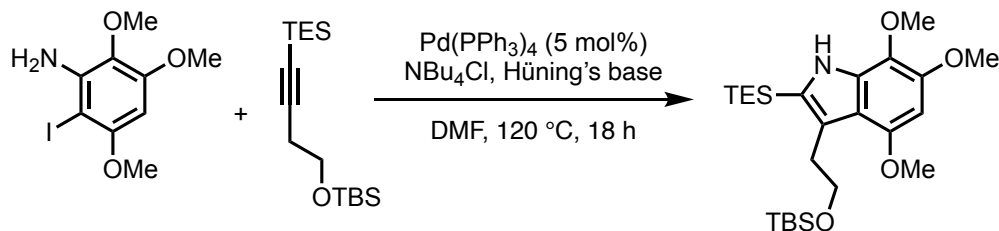

Iodoaniline **11** (11.0 g, 35.6 mmol, 1.0 equiv), silylated alkyne **12** (15.9 g, 53.4 mmol, 1.5 equiv), and DMF (120 mL, 0.3 M with respect to **11**) were added to a flame-dried 500 mL round-bottom flask under Ar. The solution was sparged with Ar for ~10 min and Hünig's base (18.6 mL, 0.106 mol, 3.0 equiv),  $\text{NBu}_4\text{Cl}$  (9.88 g, 35.6 mmol, 1.0 equiv) and  $\text{Pd}(\text{PPh}_3)_4$  (2.06 g, 1.78 mmol, 5 mol%) were added each in one portion. The solution was placed in a heating mantle ( $120\text{ }^\circ\text{C}$ ) and stirred for 18 h, at which point full consumption of starting material was observed by TLC. The solution was cooled to rt and diluted with  $\text{Et}_2\text{O}$  (100 mL) and saturated  $\text{NH}_4\text{Cl}$  (100 mL). The layers were separated, and the aqueous layer was extracted with  $\text{Et}_2\text{O}$  (3 x 100 mL) and the combined organic extracts were washed with  $\text{H}_2\text{O}$  (5 x 100 mL), brine (3 x 100 mL), dried ( $\text{MgSO}_4$ ), filtered, and concentrated *in vacuo*. The crude mixture was purified by flash column chromatography on silica gel (hexanes/ $\text{EtOAc}$  90:10) to give indole **10** (16.3 g, 95% yield) as a waxy yellow solid.

**$^1\text{H NMR}$** : (500 MHz,  $\text{CDCl}_3$ )  $\delta$  7.84 (s, 1H), 6.20 (s, 1H), 3.93 (s, 6H), 3.90 (s, 3H), 3.81-3.78 (m, 2H), 3.10-3.07 (m, 2H), 1.01-0.98 (m, 9H), 0.92 (s, 9H), 0.92-0.88 (m, 6H), 0.08 (s, 6H).

**$^{13}\text{C NMR}$** : (126 MHz,  $\text{CDCl}_3$ )  $\delta$  150.0, 147.1, 134.3, 130.2, 128.9, 122.6, 115.5, 90.2, 65.8, 61.1, 58.2, 55.5, 31.7, 26.3, 18.7, 7.6, 4.0, -5.0.

**HRMS** (ESI<sup>+</sup>): calculated for  $\text{C}_{25}\text{H}_{45}\text{NNaO}_4\text{Si}_2^+$  [ $\text{M}+\text{Na}$ ]<sup>+</sup> 502.2779, found: 502.2778.

**FTIR**: (thin film): 3485, 3357, 2953, 2933, 2875, 1626, 1594, 1525, 1464, 1417, 1338, 1233, 1204, 1135, 1089, 1041, 1002, 977, 902, 836, 777, 734  $\text{cm}^{-1}$ .

**TLC**:  $R_f$  = 0.19 (10%  $\text{EtOAc}$ /hexanes; stains blue with vanillin).

## Preparation of N-Methylated Indole 19

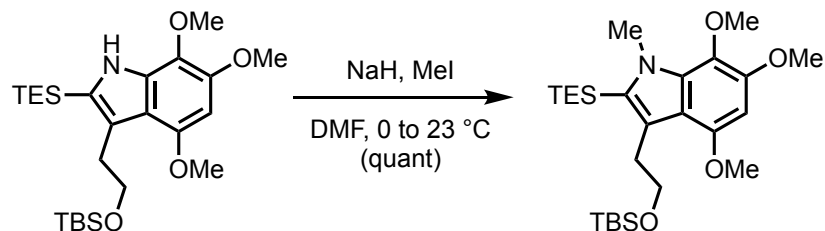

Indole **10** (1.0 g, 2.08 mmol, 1.0 equiv), MeI (0.16 mL, 2.70 mmol, 1.3 equiv), and DMF (10.4 mL, 0.2 M with respect to **10**) were added to a flame-dried 100 mL round-bottom flask. The solution was cooled to 0 °C and NaH (0.10 g, 2.50 mmol, 1.2 equiv, 60% dispersion in mineral oil) was added in one portion. The cooling bath was removed and the mixture was stirred for 1 h at rt, at which point full consumption of starting material was observed by TLC. H<sub>2</sub>O (10 mL) was added to quench the reaction. The aqueous layer was extracted with Et<sub>2</sub>O (3 x 10 mL) and the combined organic extracts were washed with H<sub>2</sub>O (5 x 10 mL), brine (10 mL), dried (MgSO<sub>4</sub>), filtered, and concentrated *in vacuo*. The crude mixture was purified by flash column chromatography on silica gel (hexanes/EtOAc 95:5) to give N-methylated indole **19** (1.03 g, quant) as a white waxy solid.

*Note: Due to sodium hydride (NaH) being moisture sensitive and flammable solid, proper caution should be implemented.*

**<sup>1</sup>H NMR:** (400 MHz, CDCl<sub>3</sub>) δ 6.20 (s, 1H), 4.02 (s, 3H), 3.93 (s, 3H), 3.89 (s, 3H), 3.86 (s, 3H), 3.77-3.73 (m, 2H), 3.17-3.13 (m, 2H), 1.03-0.95 (m, 15H), 0.93 (s, 9H), 0.08 (s, 6H).

**<sup>13</sup>C NMR:** (101 MHz, CDCl<sub>3</sub>) 150.1, 148.6, 134.4, 133.8, 130.4, 123.6, 115.9, 89.9, 66.4, 61.9, 58.2, 55.4, 35.3, 30.7, 26.2, 18.6, 7.8, 5.1, -5.0.

**HRMS** (ESI<sup>+</sup>): calculated for C<sub>26</sub>H<sub>47</sub>NNaO<sub>4</sub>Si<sub>2</sub><sup>+</sup> [M+Na]<sup>+</sup> 516.2936, found: 516.2936.

**FTIR** (thin film): 2953, 2931, 2875, 1610, 1516, 1463, 1341, 1287, 1255, 1215, 1154, 1117, 1085, 1020, 1003, 982, 930, 865, 836, 776, 733, 418cm<sup>-1</sup>.

**TLC:** R<sub>f</sub> = 0.33 (10% EtOAc/hexanes; stains purple with vanillin).

## Preparation Indoloquinone **20**

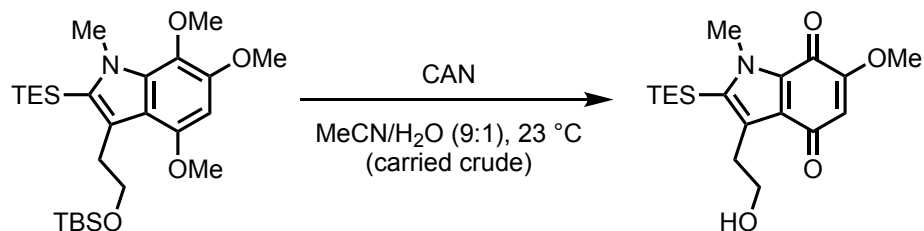

N-methyl indole **19** (0.53 g, 1.08 mmol, 1.0 equiv), CAN (1.48 g, 2.70 mmol, 2.5 equiv) and MeCN/H<sub>2</sub>O (14 mL, 9:1 mixture, 0.07 M with respect to **19**) were added to a 50 mL round-bottom flask. The mixture was stirred for 0.5 h, at which point full consumption of starting material was observed by TLC. The reaction was then quenched by the addition of H<sub>2</sub>O (100 mL) added and the aqueous layer was extracted with CH<sub>2</sub>Cl<sub>2</sub> (5 x 50 mL). The combined organic extracts were washed with H<sub>2</sub>O (100 mL), dried (Na<sub>2</sub>SO<sub>4</sub>), filtered, and concentrated *in vacuo* to give indoloquinone **20**. The crude mixture was carried forward without further purification.

**<sup>1</sup>H NMR:** (300 MHz, CDCl<sub>3</sub>): δ 5.67 (s, 1H), 4.05 (s, 3H), 3.81 (s, 3H), 3.78 (t, J = 6.3 Hz, 2H; overlaps with s at 3.81 ppm), 3.11 (t, J = 6.4 Hz, 2H), 1.00-0.93 (m, 15).

## Preparation of Ts-Indoloquinone **21**

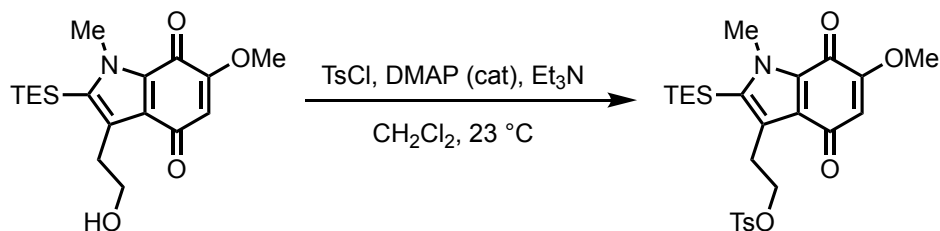

Crude indoloquinone **20** (0.47 g, 1.0 equiv, ~1.35 mmol), TsCl (0.51 g, 2.70 mmol, 2.0 equiv), DMAP (0.033 g, 0.27 mmol, 20 mol%), and DCM (4.5 mL, 0.2M with respect to **20**) were added to a flame-dried 10 mL round-bottom flask. Et<sub>3</sub>N (0.38 mL, 2.70 mmol, 2.0 equiv) was added dropwise and the solution was stirred for 2 h. The reaction was diluted with H<sub>2</sub>O (20 mL) and extracted with CH<sub>2</sub>Cl<sub>2</sub> (3 x 10 mL). The combined organic extracts were washed with H<sub>2</sub>O (20 mL), brine (20 mL), dried (Na<sub>2</sub>SO<sub>4</sub>), filtered, and concentrated *in vacuo*. The crude mixture was purified by flash column chromatography on silica gel (hexanes/EtOAc 70:30) to give indoloquinone **21** (0.342 g, 63% yield over two steps) as an orange foam.

**<sup>1</sup>H NMR:** (300 MHz, CDCl<sub>3</sub>) δ 7.65-7.63 (m, 2H), 7.24-7.21 (m, 2H), 5.57 (s, 1H), 4.20 (t, *J* = 6.7 Hz, 2H), 4.02 (s, 3H), 3.80 (s, 3H), 3.13 (t, *J* = 6.7 Hz, 2H), 2.38 (s, 3H), 1.00-0.89 (m, 15H).

**<sup>13</sup>C NMR:** (126 MHz, CDCl<sub>3</sub>) δ 183.9, 171.9, 159.9, 144.5, 141.2, 133.0, 131.6, 130.4, 129.6, 128.0, 124.0, 107.3, 69.9, 56.7, 36.7, 25.7, 21.6, 7.6, 4.6.

**HRMS** (ESI<sup>+</sup>): calculated for C<sub>25</sub>H<sub>33</sub>NNaO<sub>6</sub>SSi<sup>+</sup> [M+Na]<sup>+</sup> 526.1690, found: 526.1693.

**FTIR** (thin film): 2956, 2876, 1663, 1638, 1601, 1519, 1455, 1413, 1357, 1336, 1243, 1210, 1187, 1173, 1109, 1068, 1036, 1000, 959, 901, 843, 814, 782, 728, 662, 569, 553, 522, 494, 452 cm<sup>-1</sup>.

**TLC:** R<sub>f</sub> = 0.15 (40% EtOAc/hexanes).

## Preparation of Azidoindoloquinone **9**

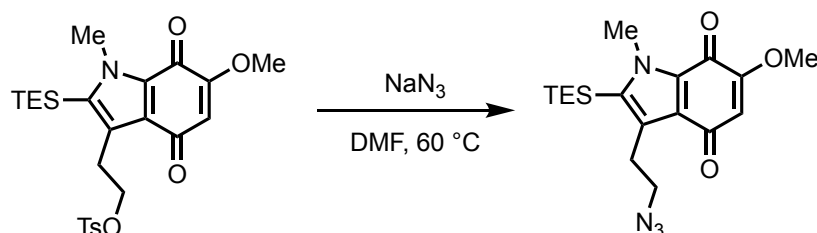

Indoloquinone **21** (0.34 g, 0.678 mmol, 1.0 equiv),  $\text{NaN}_3$  (0.221 g, 3.4 mmol, 5 equiv), and DMF (4 mL, 0.16 mmol/mL with respect to **21**) were added to a flame-dried 10 mL round-bottom flask. The mixture was placed in a heating mantle and stirred for 24 h at  $60\text{ }^\circ\text{C}$ . The mixture was cooled to rt and diluted with  $\text{H}_2\text{O}$  (10 mL) and extracted with EtOAc (3 x 10 mL). The combined organic extracts were washed with  $\text{H}_2\text{O}$  (3 x 10 mL), brine (3 x 10 mL), dried ( $\text{MgSO}_4$ ), filtered, and concentrated *in vacuo*. The crude mixture was purified by flash column chromatography on silica gel (hexanes/EtOAc 70:30) to give azainodoloquinone **9** (0.143 g, 57% yield) as an orange oil that solidifies in the freezer ( $\sim 20\text{ }^\circ\text{C}$ ).

*Note: Due to sodium azide being heat, shock, and friction sensitive, proper caution should be implemented.*

**$^1\text{H NMR}$** : (400 MHz,  $\text{CDCl}_3$ ):  $\delta$  5.67 (s, 1H), 4.05 (s, 3H), 3.80 (s, 3H), 3.45-3.42 (m, 2H), 3.10-3.06 (m, 2H), 1.01-0.90 (m, 15H).

**$^{13}\text{C NMR}$** : (101 MHz,  $\text{CDCl}_3$ ):  $\delta$  184.2, 172.1, 160.1, 140.6, 132.4, 131.8, 124.3, 107.5, 56.7, 51.8, 36.7, 26.0, 7.6, 4.6.

**HRMS** (ESI+): calculated for  $\text{C}_{18}\text{H}_{26}\text{N}_4\text{NaO}_3\text{Si}^+$   $[\text{M}+\text{Na}]^+$  397.1666, found: 397.1671.

**FTIR** (thin film): 2955, 2876, 2094, 1665, 1641, 1603, 1519, 1456, 1413, 1337, 1242, 1211, 1110, 1054, 1034, 1002, 925, 892, 844, 794, 735, 486, 456,  $426\text{ cm}^{-1}$ .

**TLC**:  $R_f = 0.22$  (20% EtOAc/hexanes).

## Preparation of Vinylogous Imidate **6b**

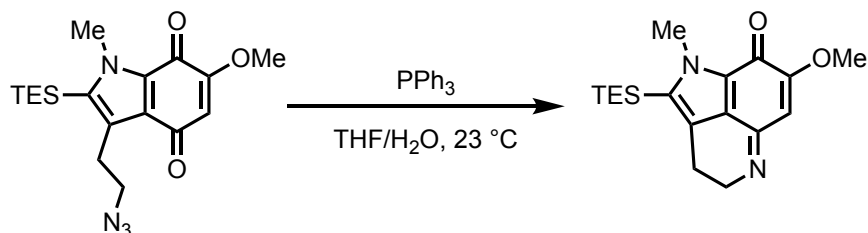

Azidoindoloquinone **9** (0.14 g, 0.382 mmol, 1.0 equiv),  $\text{PPh}_3$  (0.20 g, 0.764 mmol, 2.0 equiv), and  $\text{THF}/\text{H}_2\text{O}$  (2.2 mL, 9:1 mixture, 0.2 M with respect to **9**) were added to a 6-dram vial. The mixture stirred for 16 h, at which point complete consumption of starting material was observed by TLC. The contents of the vial were transferred to a flask (rinsing the sides of the vial with  $\text{CH}_2\text{Cl}_2$ ), dried ( $\text{Na}_2\text{SO}_4$ ), filtered, and concentrated *in vacuo*. The crude mixture was purified by flash column chromatography on silica gel ( $\text{CH}_2\text{Cl}_2/\text{MeOH}$  97:3) to give vinylogous imidate **6b** (0.082 g, 65% yield) as a dark purple oil.

*Note:* We have found the vinylogous imidate **6b** to be unstable as an impurity (<10%) quickly starts to form over time. We have found that the impurity does not impede the overall reactivity of the next step (aminolysis) and could be readily separated at that point. In addition, we have discovered that this two-step sequence (Staudinger reduction and aminolysis) could be accomplished in one-pot to obtain the desired vinylogous amidine **22** in comparable yields.

**Two-step, one-pot sequence:** Azaindoloquinone **9** (0.027 g, 0.072 mmol, 1.0 equiv),  $\text{PPh}_3$  (0.038 g, 0.144 mmol, 2.0 equiv), and  $\text{THF}/\text{H}_2\text{O}$  (0.4 mL, 9:1 mixture) were added to a 6-dram vial. The mixture stirred for 16 h and  $\text{Na}_2\text{SO}_4$  was added. The contents of the vial were filtered into a 6-dram vial and concentrated *in vacuo*. The crude mixture was carried forward without further purification.

**$^1\text{H}$  NMR:** (400 MHz,  $\text{CDCl}_3$ )  $\delta$  6.05 (s, 1H), 4.11 (t,  $J = 7.8$  Hz, 2H), 4.04 (s, 3H), 3.81 (s, 3H), 2.79 (t,  $J = 7.8$  Hz, 2H), 0.99-0.95 (m, 9H), 0.90-0.86 (m, 6H).

**$^{13}\text{C}$  NMR:** (101 MHz,  $\text{CDCl}_3$ )  $\delta$  171.6, 158.7, 156.8, 137.8, 127.18, 127.16, 121.1, 105.9, 56.6, 50.9, 35.9, 20.8, 7.5, 4.0.

**HRMS** (ESI<sup>+</sup>): calculated for  $\text{C}_{18}\text{H}_{27}\text{N}_2\text{O}_2\text{Si}^+$   $[\text{M}+\text{H}]^+$  331.1836, found: 331.1834.

**FTIR** (thin film): 2953, 2875, 1654, 1614, 1571, 1452, 1320, 1282, 1218, 1179, 1129, 1044, 1007, 921, 837, 792, 734, 698, 585, 421  $\text{cm}^{-1}$ .

**TLC:**  $R_f = 0.33$  (5%  $\text{MeOH}/\text{CH}_2\text{Cl}_2$ ).



## Preparation of Vinylogous Amidine **22**

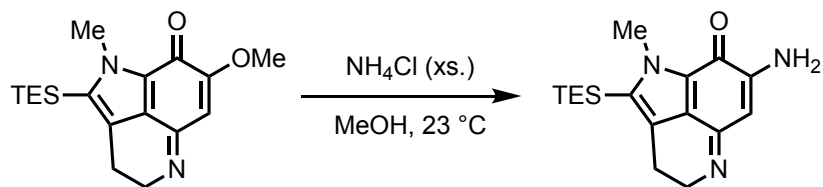

Vinylogous imidate **6b** (0.071 g, 0.214 mmol, 1.0 equiv), NH<sub>4</sub>Cl (0.11 g, 2.14 mmol, 10 equiv), and MeOH (1 mL, 0.2 M with respect to **6b**) were added to a 2-dram vial. The mixture was stirred for 16 h, at which point, full consumption of the starting material was observed by TLC. The reaction was concentrated *in vacuo* and the crude mixture was purified by flash column chromatography on silica gel (CH<sub>2</sub>Cl<sub>2</sub>/MeOH 90:10) to give vinylogous amidine **22** (0.038 g, 56% yield) as a dark green solid.

**Two-step, one-pot sequence:** crude vinylogous imidate **6b**, NH<sub>4</sub>Cl (0.039 g, 0.72 mmol, 10.0 equiv) and MeOH (0.3 mL) were added to a 6-dram vial. The mixture was stirred for 16 h and concentrated *in vacuo*. The crude mixture was purified by flash column chromatography on silica gel (CH<sub>2</sub>Cl<sub>2</sub>/MeOH 90:10) to give vinylogous amidine **22** (0.012 g, 53% yield over two steps)

*Note: The <sup>1</sup>H NMR peak corresponding to the -NH<sub>2</sub> of the vinylogous amidine is presumed to be exchange-broadened and is not observed in the spectral data reported below.*

**<sup>1</sup>H NMR:** (600 MHz, methanol-*d*<sub>4</sub>) δ 5.65 (s, 1H), 4.07 (s, 3H), 3.82 (t, *J* = 7.6 Hz, 2H), 3.01 (t, *J* = 7.6 Hz, 2H), 1.04-0.95 (m, 15H).

**<sup>13</sup>C NMR:** (151 MHz, methanol-*d*<sub>4</sub>) δ 169.8, 160.0, 157.8, 142.5, 129.9, 128.8, 123.3, 87.9, 43.9, 37.1, 21.8, 7.6, 4.5.

**HRMS** (ESI<sup>+</sup>): calculated for C<sub>17</sub>H<sub>26</sub>N<sub>3</sub>OSi<sup>+</sup> [M+H]<sup>+</sup> 316.1840, found: 316.1841.

**FTIR** (thin film): 2955, 2875, 1676, 1607, 1530, 1455, 1392, 1343, 1295, 1253, 1223, 1139, 1004, 967, 846, 726 cm<sup>-1</sup>.

**TLC:** R<sub>f</sub> = 0.18 (4% MeOH/CH<sub>2</sub>Cl<sub>2</sub>).

## Preparation of Makaluvamine A (1)

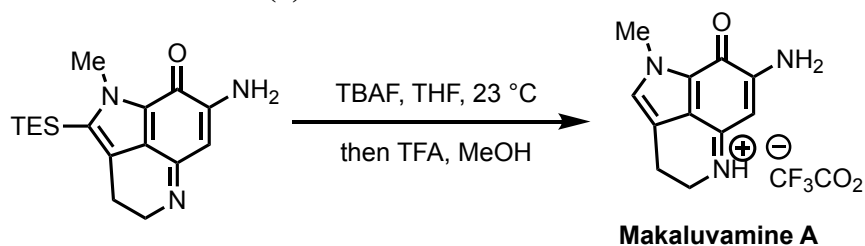

Vinylogous amidine **22** (0.013 g, 0.041 mmol, 1.0 equiv) and THF (0.2 mL, 0.2 M with respect to **22**) were added to flame-dried 2-dram vial. The solution was cooled to 0 °C and TBAF (0.08 mL, 0.082 mmol, 2.0 equiv, 1M solution in THF) was added dropwise. The reaction was warmed to rt (by removing ice bath) and the solution was stirred for 1 h at this temperature, at which point full consumption of starting material was observed by TLC. The reaction was concentrated *in vacuo* and the crude mixture was purified by flash column chromatography on silica gel (CHCl<sub>3</sub>/MeOH/NH<sub>4</sub>OH 89:10:1) to give makaluvamine A (**1**), which was redissolved in MeOH (5 mL) and TFA (0.1 mL) was added. The resulting solution concentrated to give the corresponding TFA salt as dark purple solid (0.009 g, 69% yield).<sup>2</sup>

**<sup>1</sup>H NMR:** (600 MHz, DMSO-*d*<sub>6</sub>) δ 10.40 (s, 1H), 9.09 (s, 1H), 8.40 (s, 1H), 7.31 (s, 1H), 5.60 (s, 1H), 3.89 (s, 3H), 3.76 (td, = 7.6, 2.7 Hz, 2H), 2.84 (t, = 7.6 Hz, 2H).

**<sup>13</sup>C NMR:** (151 MHz, DMSO-*d*<sub>6</sub>) δ 168.3, 156.8, 156.1, 131.1, 123.1, 122.4, 117.9, 86.5, 42.1, 35.9, 18.1.

**HRMS** (ESI<sup>+</sup>): calculated for C<sub>11</sub>H<sub>12</sub>N<sub>3</sub>O<sup>+</sup> [M+H]<sup>+</sup> 202.0975, found: 202.0975.

**FTIR** (thin film): 3470 (br), 2953, 2930, 2856, 1759, 1644, 1542, 1462, 1440, 1376, 1319, 1254, 1204, 1143, 1110, 1007, 894, 836, 808, 776, 698, 650, 588, 544, 491, 435, 424 cm<sup>-1</sup>.

**TLC:** R<sub>f</sub> = 0.15 (10% MeOH/CH<sub>2</sub>Cl<sub>2</sub>).

### Preparation of Secondary Vinylogous Amidine **23**

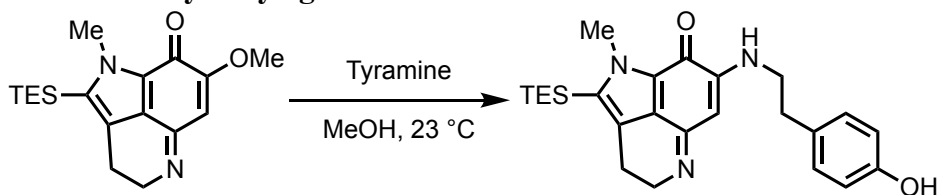

Vinylogous imidate **6b** (0.37 g, 1.12 mmol, 1.0 equiv), tyramine (0.23 g, 1.68 mmol, 1.5 equiv), and MeOH (5.5 mL, 0.2M with respect to **6b**) were added to a 10 mL round-bottom flask. The mixture was stirred for 16 h, at which point full consumption of the starting material was observed by TLC. The reaction was concentrated *in vacuo* and the crude mixture was purified by flash column chromatography on silica gel (CH<sub>2</sub>Cl<sub>2</sub>/MeOH 90:10) to give secondary vinylogous amidine **23** (0.21 g, 43% yield) as a dark brown film.

**<sup>1</sup>H NMR:** (500 MHz, methanol-*d*<sub>4</sub>) δ 7.07 (d, *J* = 8.5 Hz, 2H), 6.72 (d, *J* = 8.4 Hz, 2H), 5.42 (s, 1H), 4.06 (s, 3H), 3.82 (t, *J* = 7.6 Hz, 2H), 3.54 (t, *J* = 7.3 Hz, 2H), 3.00 (t, *J* = 7.7 Hz, 2H), 2.88 (t, *J* = 7.0 Hz, 2H), 1.04-0.95 (m, 15H).

**<sup>13</sup>C NMR:** (125 MHz, methanol-*d*<sub>4</sub>) δ 169.3, 159.4, 157.4, 154.7, 142.8, 130.9, 130.0, 129.9, 128.8, 123.3, 116.5, 85.5, 46.5, 44.1, 37.1, 34.4, 21.8, 7.6, 4.5.

**HRMS (ESI+):** (ESI+): calculated for C<sub>25</sub>H<sub>34</sub>N<sub>3</sub>OSi<sup>+</sup> [M+H]<sup>+</sup> 436.2415, found: 436.2414.

**FTIR** (thin film): 3202, 2954, 2926, 2874, 1726, 1672, 1599, 1544, 1515, 1452, 1345, 1254, 1138, 1064, 1005, 968, 832, 738 cm<sup>-1</sup>.

**TLC:** R<sub>f</sub> = 0.16 (10% MeOH/CH<sub>2</sub>Cl<sub>2</sub>).

### Preparation of Makaluvamine K (4)

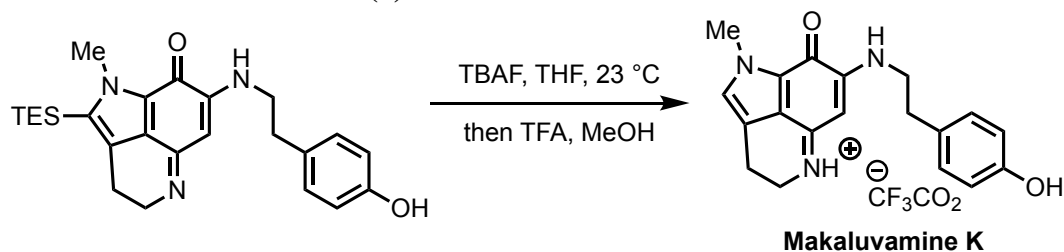

Vinylgous amidine **23** (0.050 g, 0.114 mmol, 1.0 equiv) and THF (0.6 mL, [0.2 M] in respect to **23**) were added to flame-dried 2-dram vial. The solution was cooled to 0 °C and TBAF (0.17 mL, 0.172 mmol, 1.5 equiv, 1M solution in THF) was added dropwise. The reaction warmed to rt (by removing ice bath), and the solution stirred for 1 h, at which point, full consumption of starting material was observed by TLC. The reaction was concentrated *in vacuo* and the crude mixture was purified by flash column chromatography on silica gel (CHCl<sub>3</sub>/MeOH/TFA 89:10:1) to give makaluvamine K (**4**), which was redissolved in MeOH (5 mL) and TFA (0.1 mL) was added. The resulting solution concentrated to give the corresponding TFA salt as red brown solid (0.025 g, 51% yield).<sup>3</sup>

**<sup>1</sup>H NMR:** (400 MHz, DMSO-*d*<sub>6</sub>) δ 10.53 (s, 1H), 9.29 (br s, 1H), 8.95 (t, *J* = 6.3 Hz, 1H), 7.33 (s, 1H), 7.04 (d, *J* = 8.4 Hz, 2H), 6.71 (d, *J* = 8.4 Hz, 2H), 5.50 (s, 1H), 3.90 (s, 3H), 3.78 (td, *J* = 7.7, 2.4 Hz, 2H), 3.50-3.40 (m, 2H), 2.85 (t, *J* = 7.6 Hz, 2H), 2.78 (t, *J* = 7.6 Hz, 2H).

**<sup>13</sup>C NMR:** (125 MHz, DMSO-*d*<sub>6</sub>) δ 167.7, 156.5, 156.0, 152.9, 131.4, 129.6, 128.2, 123.1, 122.3, 118.1, 115.3, 84.2, 45.1, 42.2, 35.9, 32.4, 18.1.

**HRMS** (ESI<sup>+</sup>): calculated for C<sub>19</sub>H<sub>20</sub>N<sub>3</sub>O<sub>2</sub><sup>+</sup> [M+H]<sup>+</sup> 322.1550, found: 322.1551.

**FTIR** (thin film): 3239 (br), 2923, 2853, 1676, 1599, 1557, 1517, 1436, 1352, 1318, 1200, 1133, 970, 837, 801, 722 cm<sup>-1</sup>.

**TLC:** R<sub>f</sub> = 0.30 (1% TFA/10% MeOH/CH<sub>2</sub>Cl<sub>2</sub>).

### **III. SPECTRAL COMPARISONS FOR NATURAL PRODUCTS**

**Table S1.** Tabular collation of  $^1\text{H}/^{13}\text{C}$  NMR data for synthetic and natural makaluvamine A (1)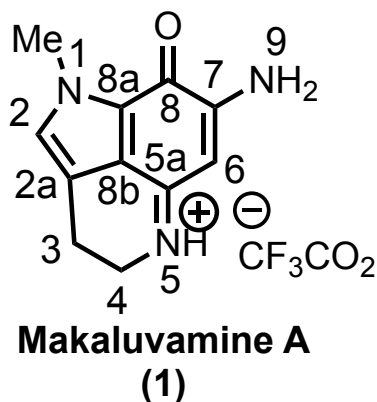

| Position | Synthetic $\delta$ $^1\text{H}$ (600 MHz) | Natural $\delta$ $^1\text{H}$ (500 MHz) | $\Delta_{\text{ppm}}$ |
|----------|-------------------------------------------|-----------------------------------------|-----------------------|
| N-Me     | 3.89 (s)                                  | 3.88 (s)                                | +0.01                 |
| 2        | 7.31 (s)                                  | 7.30 (s)                                | +0.01                 |
| 3        | 2.84 (t, $J = 7.6$ Hz)                    | 2.83 (t, $J = 7.5$ Hz)                  | +0.01                 |
| 4        | 3.76 (td, $J = 7.6, 2.7$ Hz)              | 3.75 (t, $J = 7.5$ Hz)                  | +0.01                 |
| 5        | 10.40 (s)                                 | 10.44 (s)                               | -0.04                 |
| 6        | 5.60 (s)                                  | 5.61 (s)                                | -0.01                 |
| 9        | 9.09, 8.40                                | 9.09, 8.37                              | +0.03                 |

| Position | Synthetic $\delta$ $^{13}\text{C}$ (151 MHz) | Natural $\delta$ $^{13}\text{C}$ (125 MHz) | $\Delta_{\text{ppm}}$ |
|----------|----------------------------------------------|--------------------------------------------|-----------------------|
| N-Me     | 35.9                                         | 35.8                                       | +0.1                  |
| 2        | 131.1                                        | 131.0                                      | +0.1                  |
| 2a       | 117.9                                        | 117.8                                      | +0.1                  |
| 3        | 18.1                                         | 18.0                                       | +0.1                  |
| 4        | 42.1                                         | 42.0                                       | +0.1                  |
| 5a       | 156.1                                        | 156.0                                      | +0.1                  |
| 6        | 86.5                                         | 86.4                                       | +0.1                  |
| 7        | 156.8                                        | 156.7                                      | +0.1                  |
| 8        | 168.3                                        | 168.2                                      | +0.1                  |
| 8a       | 123.1                                        | 123.0                                      | +0.1                  |
| 8b       | 122.4                                        | 122.3                                      | +0.1                  |

Makaluvamine A - proton

A

JA-2-makaluvaminea\_DMSO\_H10.fid

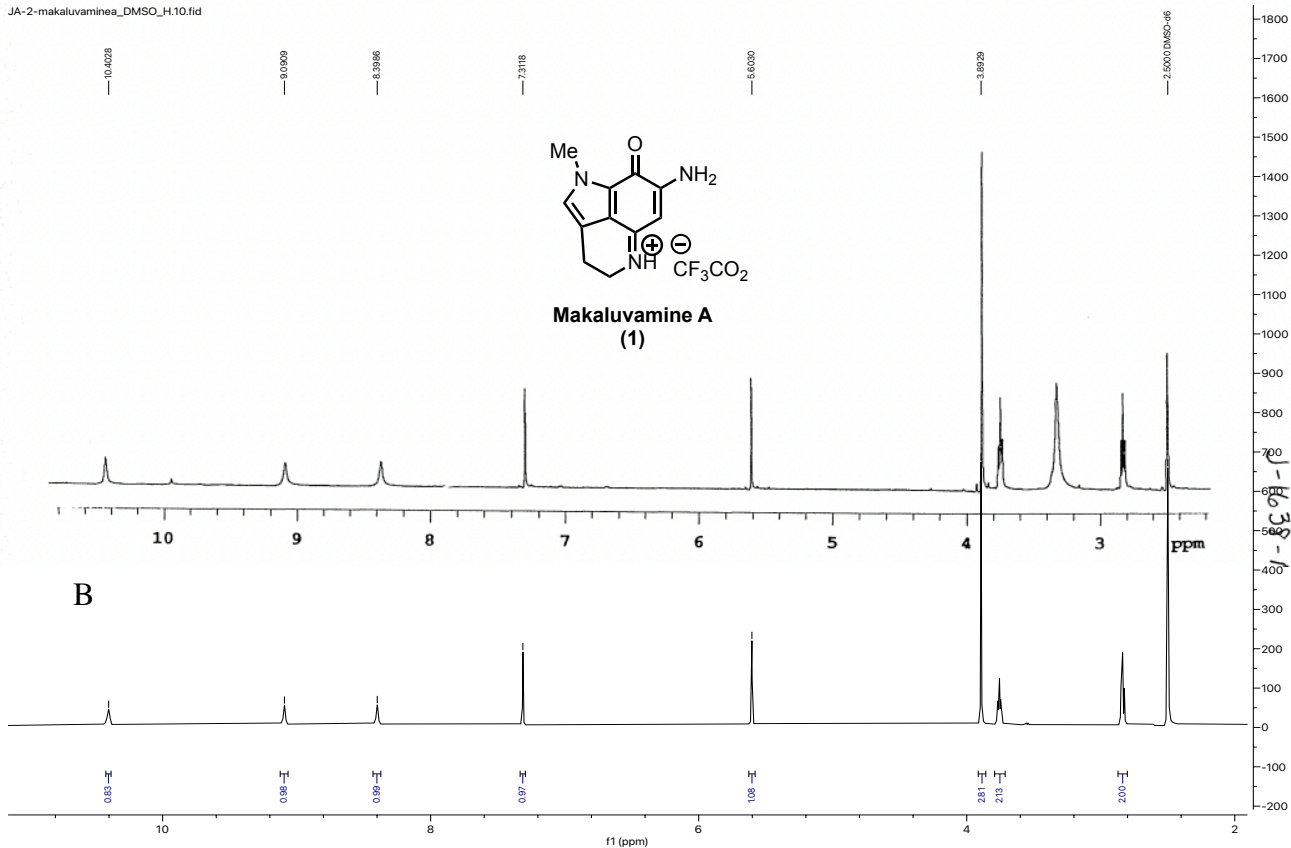

**Figure S1.** Stacked plots of (A) literature  $^1\text{H}$  NMR for makaluvamine A (see ref. 2, main text, 500 MHz) and (B) synthetic makaluvamine A (**1**)  $^1\text{H}$  NMR spectra (600 MHz).

**Table S2.** Tabular collation of  $^1\text{H}/^{13}\text{C}$  NMR data for synthetic and natural makaluvamine K (4)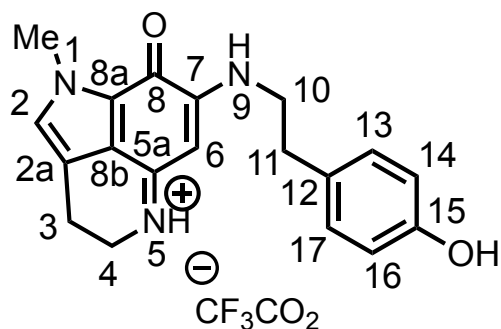**Makaluvamine K  
(4)**

| Position | Synthetic $\delta$ $^1\text{H}$ (400 MHz) | Natural $\delta$ $^1\text{H}$ (400 MHz) | $\Delta_{\text{ppm}}$ |
|----------|-------------------------------------------|-----------------------------------------|-----------------------|
| N-Me     | 3.90 (s)                                  | 3.89 (s)                                | +0.01                 |
| 2        | 7.34 (s)                                  | 7.33 (s)                                | +0.01                 |
| 3        | 2.85 (t, $J = 7.6$ Hz)                    | 2.84 (t, $J = 7.5$ Hz)                  | +0.01                 |
| 4        | 3.78 (td, $J = 7.7, 2.7$ Hz)              | 3.78 (t, $J = 7.5$ Hz)                  | 0                     |
| 5        | 10.44 (s)                                 | 10.47 (br s)                            | -0.03                 |
| 6        | 5.48 (s)                                  | 5.47 (s)                                | +0.01                 |
| 9        | 8.96 (t, $J = 6.4$ Hz)                    | 8.97 (t, $J = 6$ Hz)                    | -0.01                 |
| 10       | 3.47 (m)                                  | 3.48 (m)                                | -0.01                 |
| 11       | 2.78 (t, $J = 7.5$ Hz)                    | 2.77 (t, $J = 7$ Hz)                    | +0.01                 |
| 13,17    | 7.04 (d, $J = 8.1$ Hz)                    | 7.03 (d, $J = 8$ Hz)                    | +0.01                 |
| 14, 16   | 6.70 (d, $J = 8.2$ Hz)                    | 6.68 (d, $J = 8$ Hz)                    | +0.02                 |
| 15 (OH)  | 9.28 (br s)                               | 9.30 (br s)                             | +0.02                 |

| Position | Synthetic $\delta$ $^{13}\text{C}$ (151 MHz) | Natural $\delta$ $^{13}\text{C}$ (100.6 MHz) | $\Delta_{\text{ppm}}$ |
|----------|----------------------------------------------|----------------------------------------------|-----------------------|
| N-Me     | 35.9                                         | 35.9                                         | 0                     |
| 2        | 131.4                                        | 131.4                                        | 0                     |
| 2a       | 118.1                                        | 118.0                                        | +0.1                  |
| 3        | 18.1                                         | 18.0                                         | +0.1                  |
| 4        | 42.2                                         | 42.2                                         | 0                     |
| 5a       | 156.5                                        | 156.5                                        | 0                     |
| 6        | 84.2                                         | 84.2                                         | 0                     |
| 7        | 152.9                                        | 152.9                                        | 0                     |
| 8        | 167.7                                        | 167.7                                        | 0                     |
| 8a       | 123.1                                        | 123                                          | +0.1                  |
| 8b       | 122.3                                        | 122.3                                        | 0                     |
| 10       | 45.1                                         | 45.1                                         | 0                     |
| 11       | 32.4                                         | 32.4                                         | 0                     |
| 12       | 128.2                                        | 128.2                                        | 0                     |
| 13,17    | 129.6                                        | 129.6                                        | 0                     |
| 14, 16   | 115.3                                        | 115.3                                        | 0                     |
| 15       | 156.0                                        | 156.0                                        | 0                     |



#### **IV. SPECTRAL DATA FOR NEW COMPOUNDS**

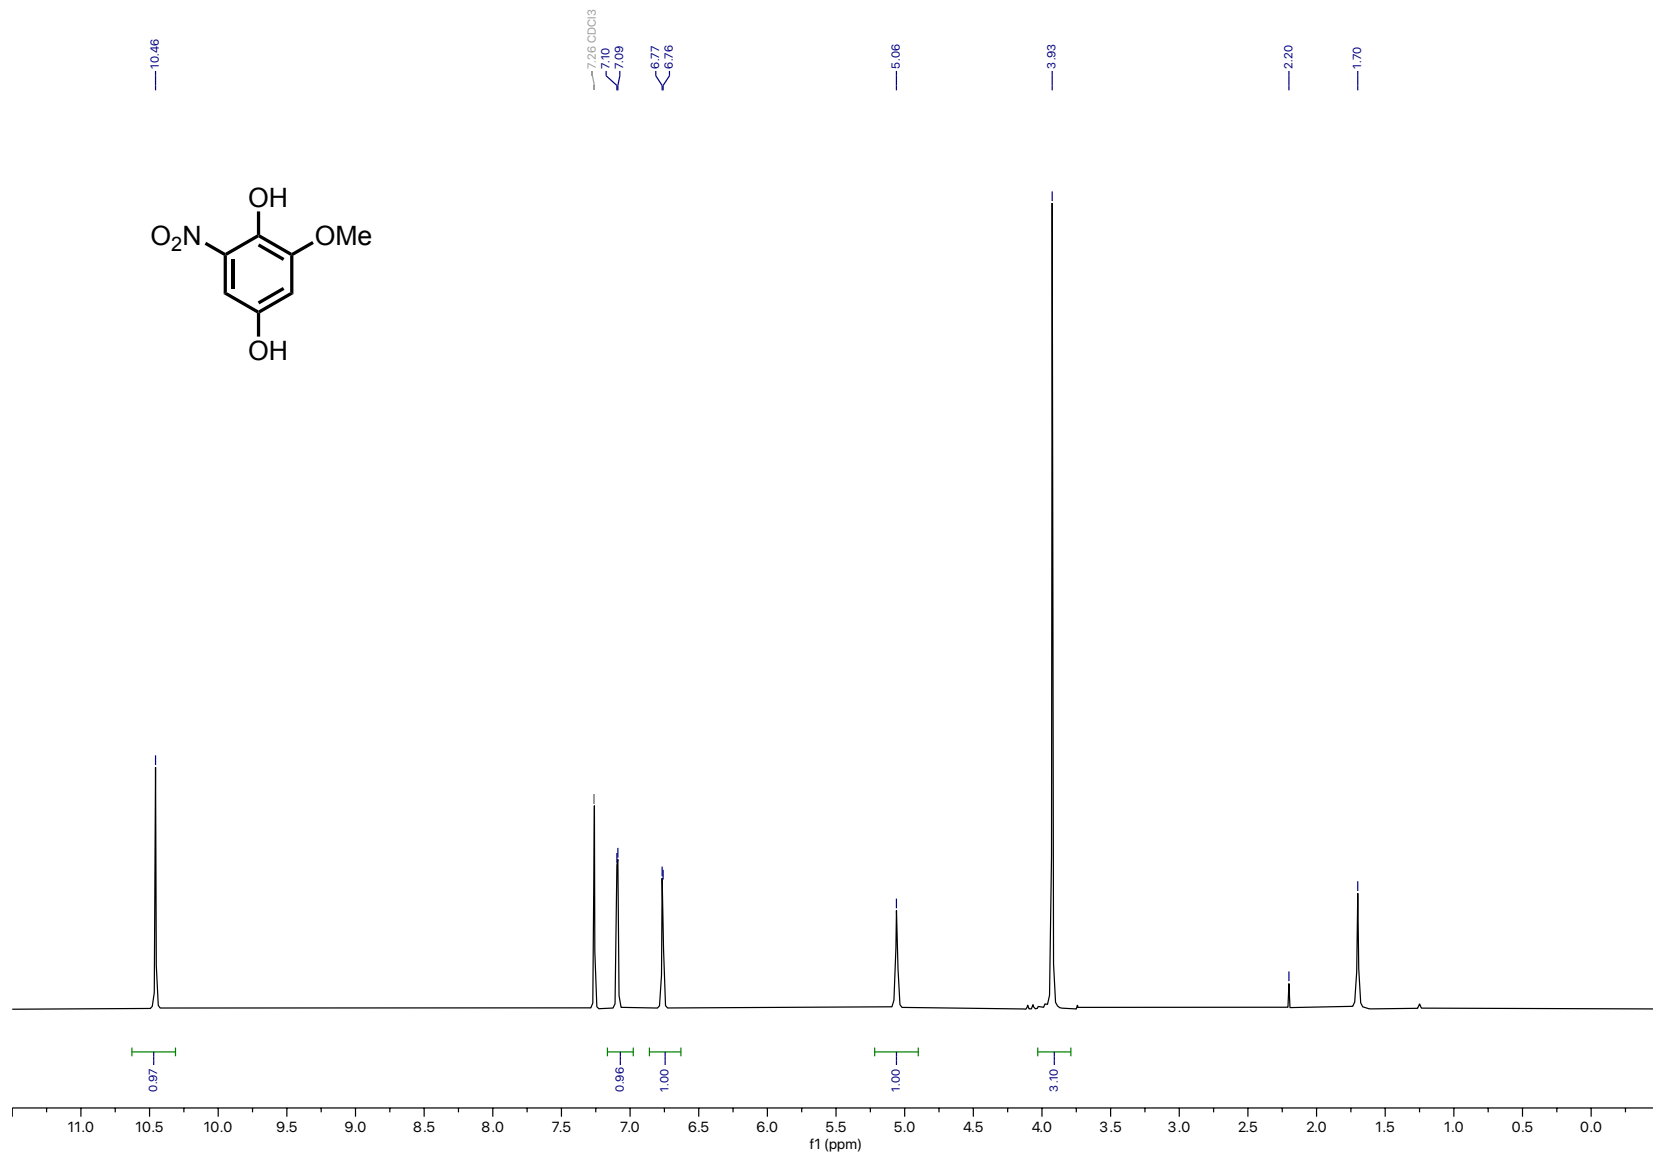

Figure S2: <sup>1</sup>H NMR (400 MHz, CDCl<sub>3</sub>) for hydroquinone 14

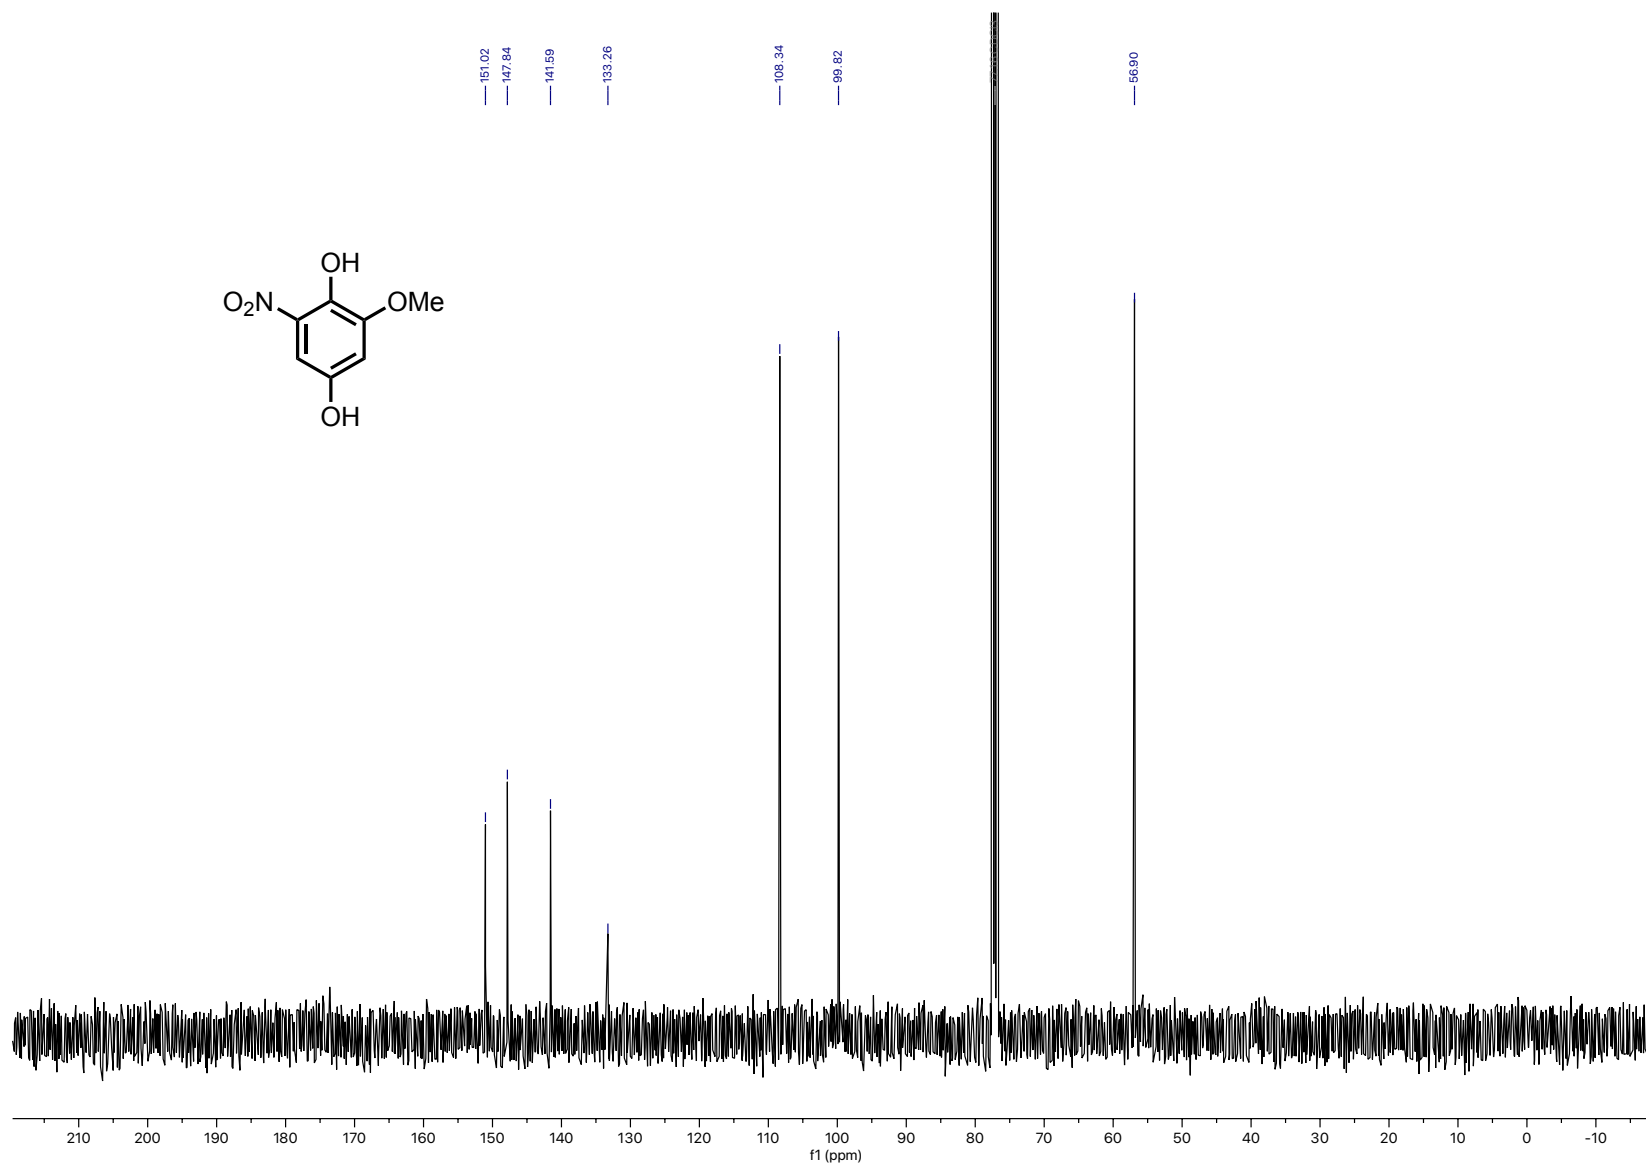

**Figure S3:** <sup>13</sup>C NMR (101 MHz, CDCl<sub>3</sub>) for hydroquinone **14**

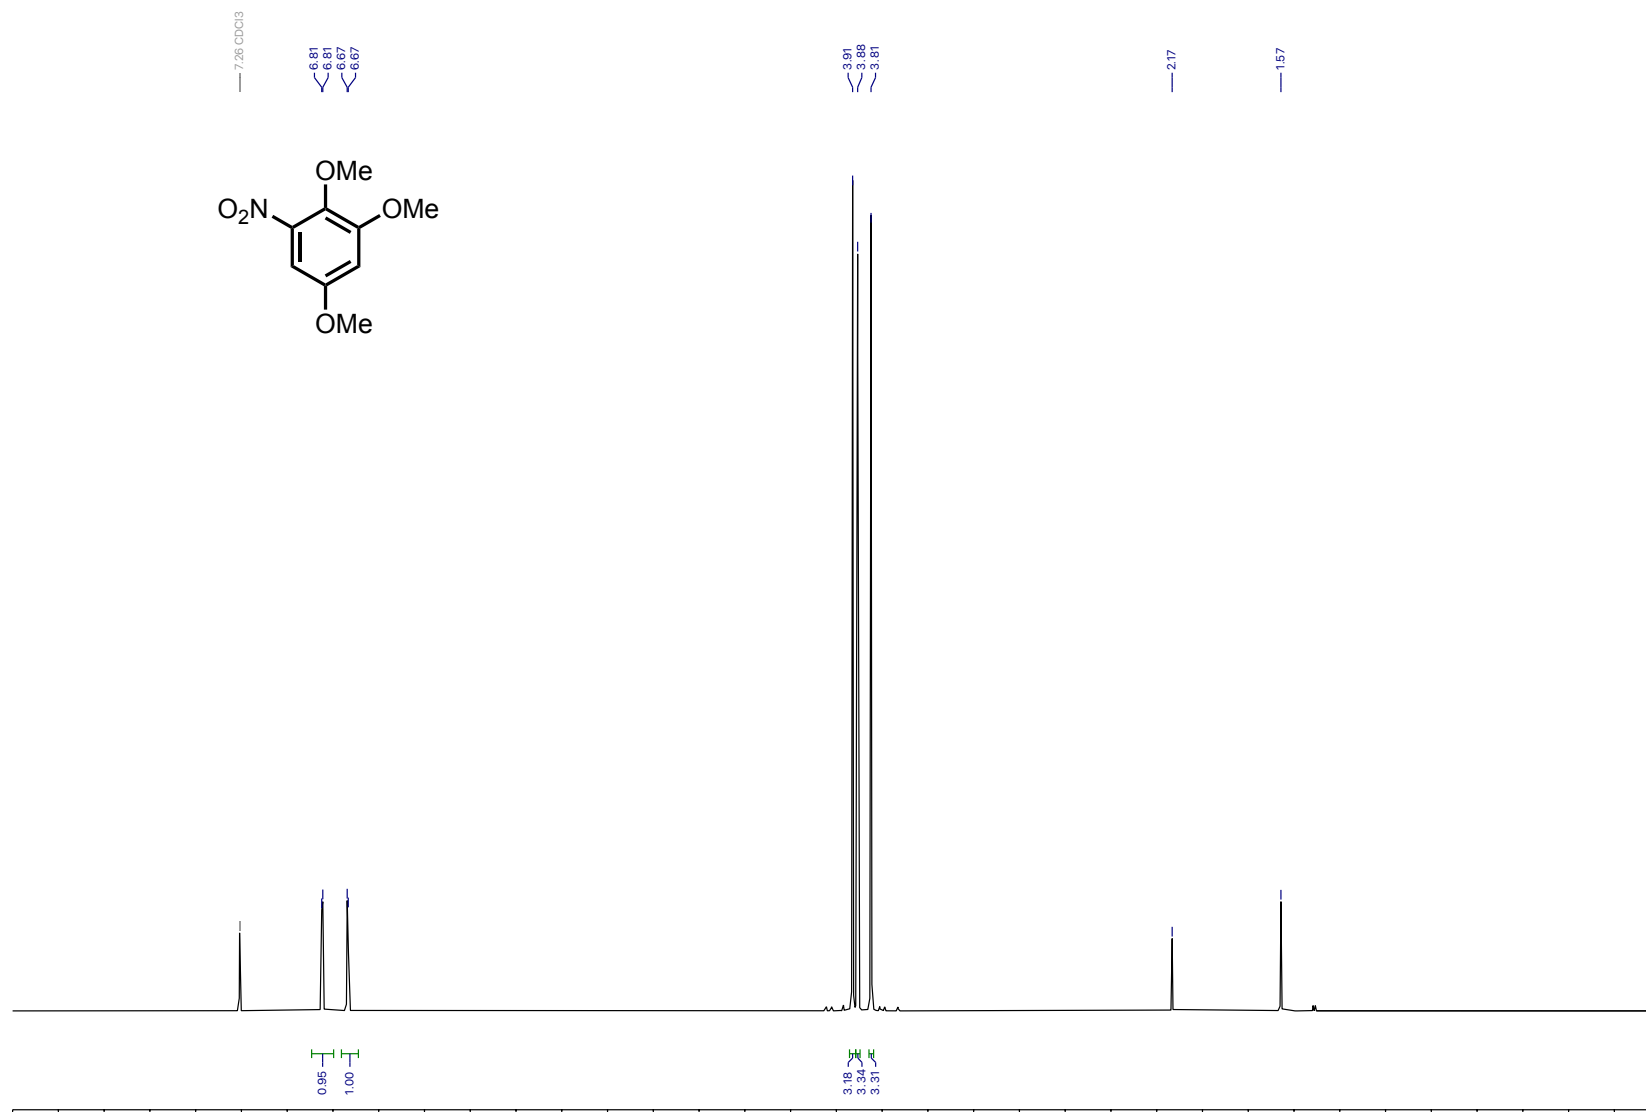

Figure S4: <sup>1</sup>H NMR (500 MHz, CDCl<sub>3</sub>) for trimethoxy arene **15**

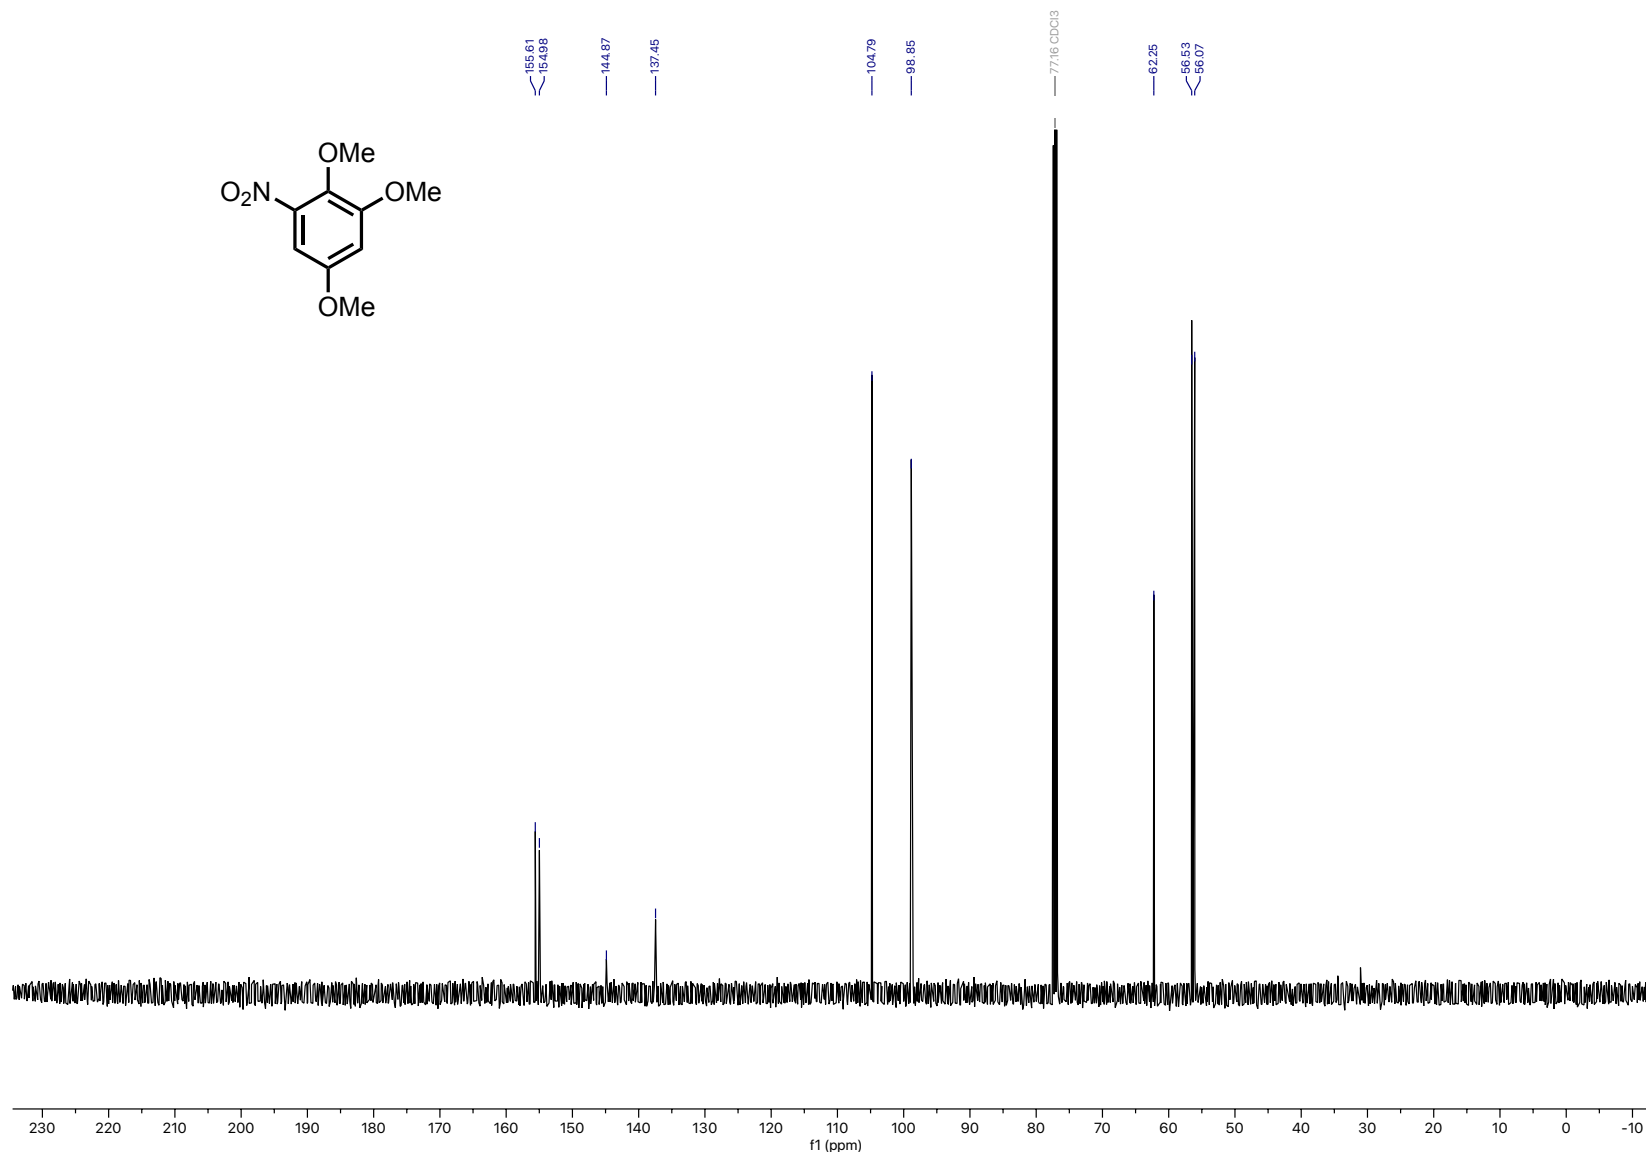

Figure S5:  $^{13}\text{C}$  NMR (126 MHz,  $\text{CDCl}_3$ ) for trimethoxy arene **15**

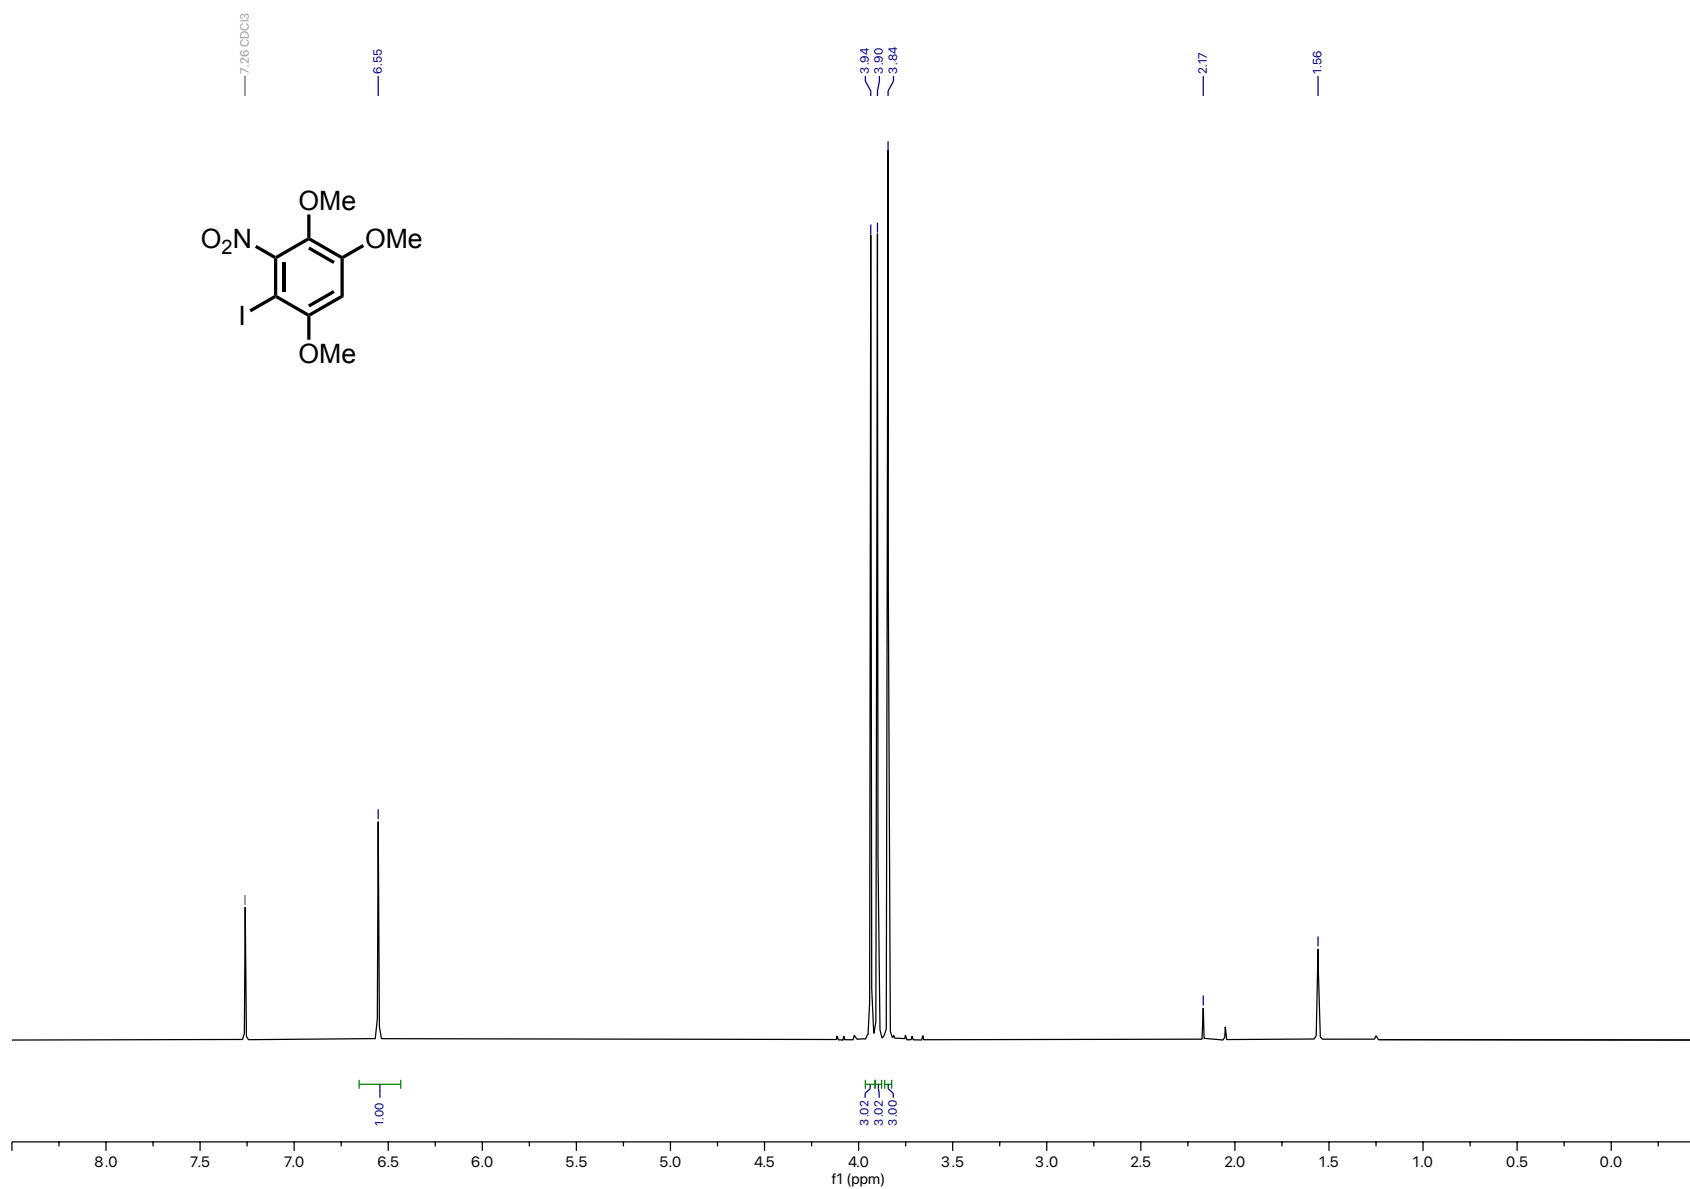

**Figure S6:** <sup>1</sup>H NMR (500 MHz, CDCl<sub>3</sub>) for aryl iodide **16**

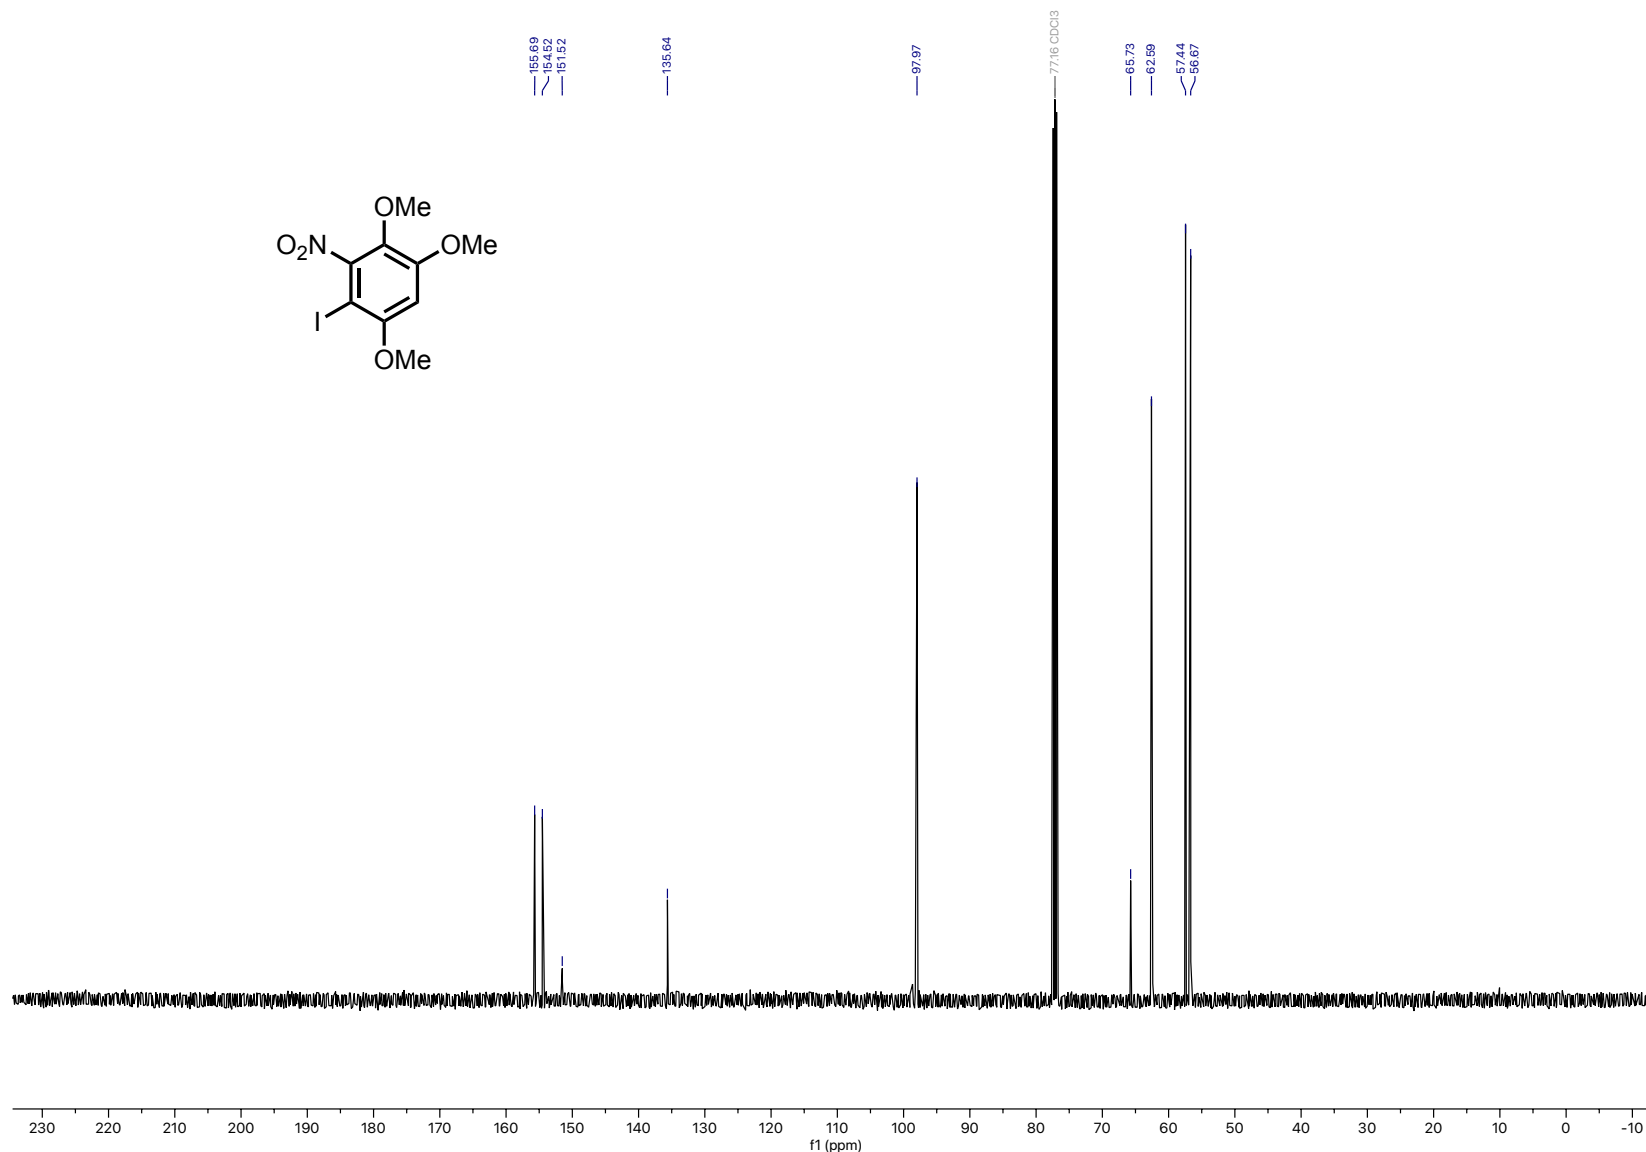

Figure S7:  $^{13}\text{C}$  NMR (126 MHz,  $\text{CDCl}_3$ ) for aryl iodide **16**

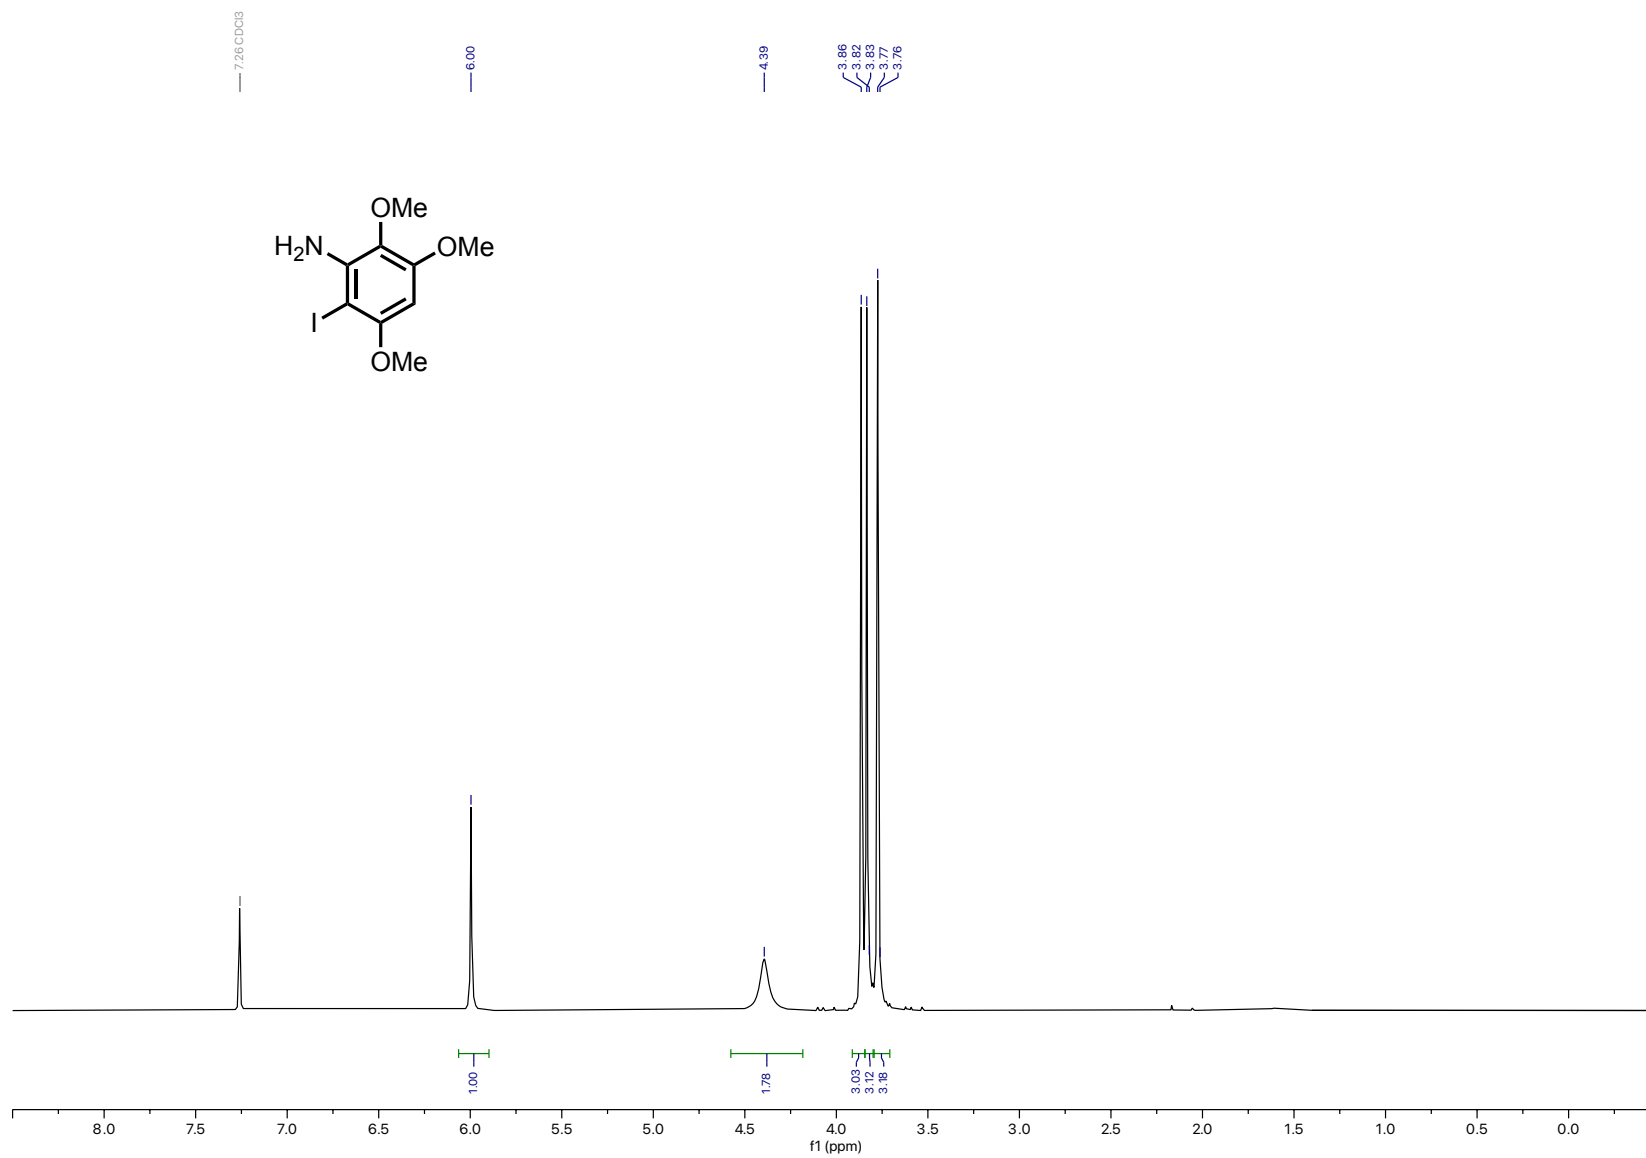

**Figure S8:** <sup>1</sup>H NMR (300 MHz, CDCl<sub>3</sub>) for iodoaniline **11**



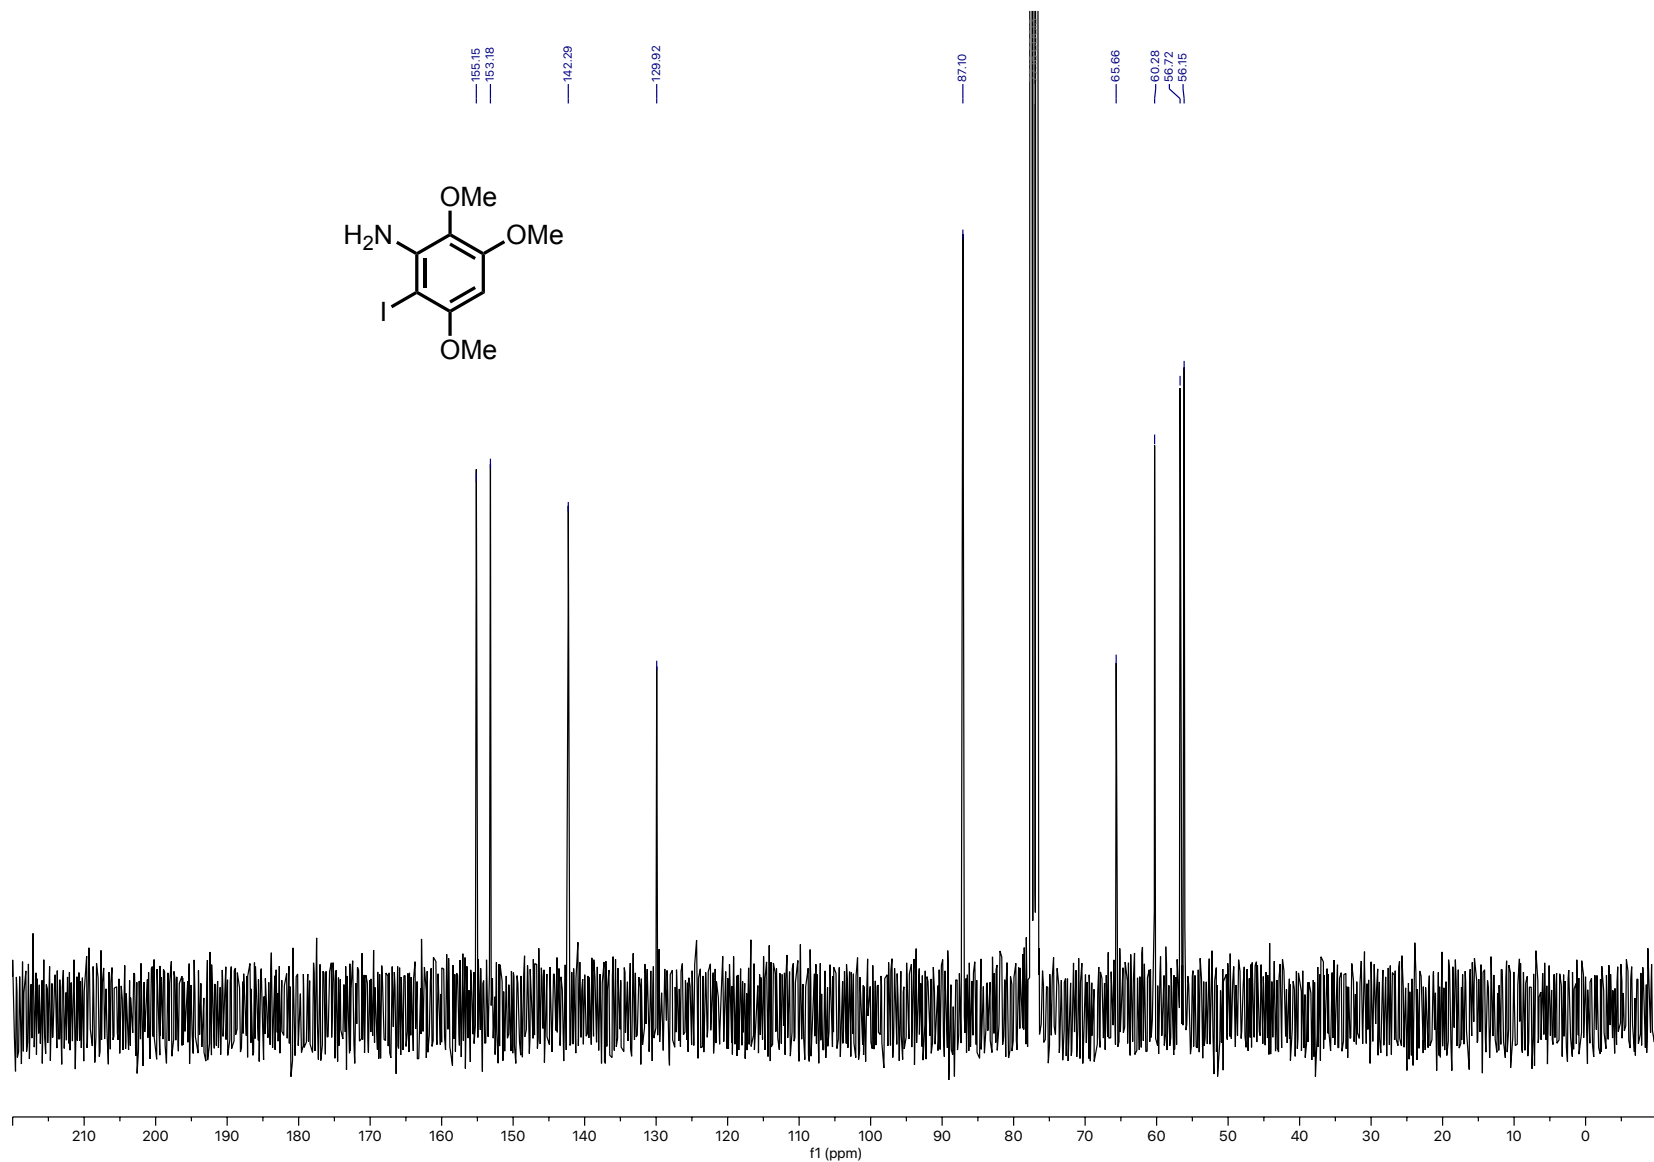

**Figure S9:**  $^{13}\text{C}$  NMR (76 MHz,  $\text{CDCl}_3$ ) for iodoaniline **11**

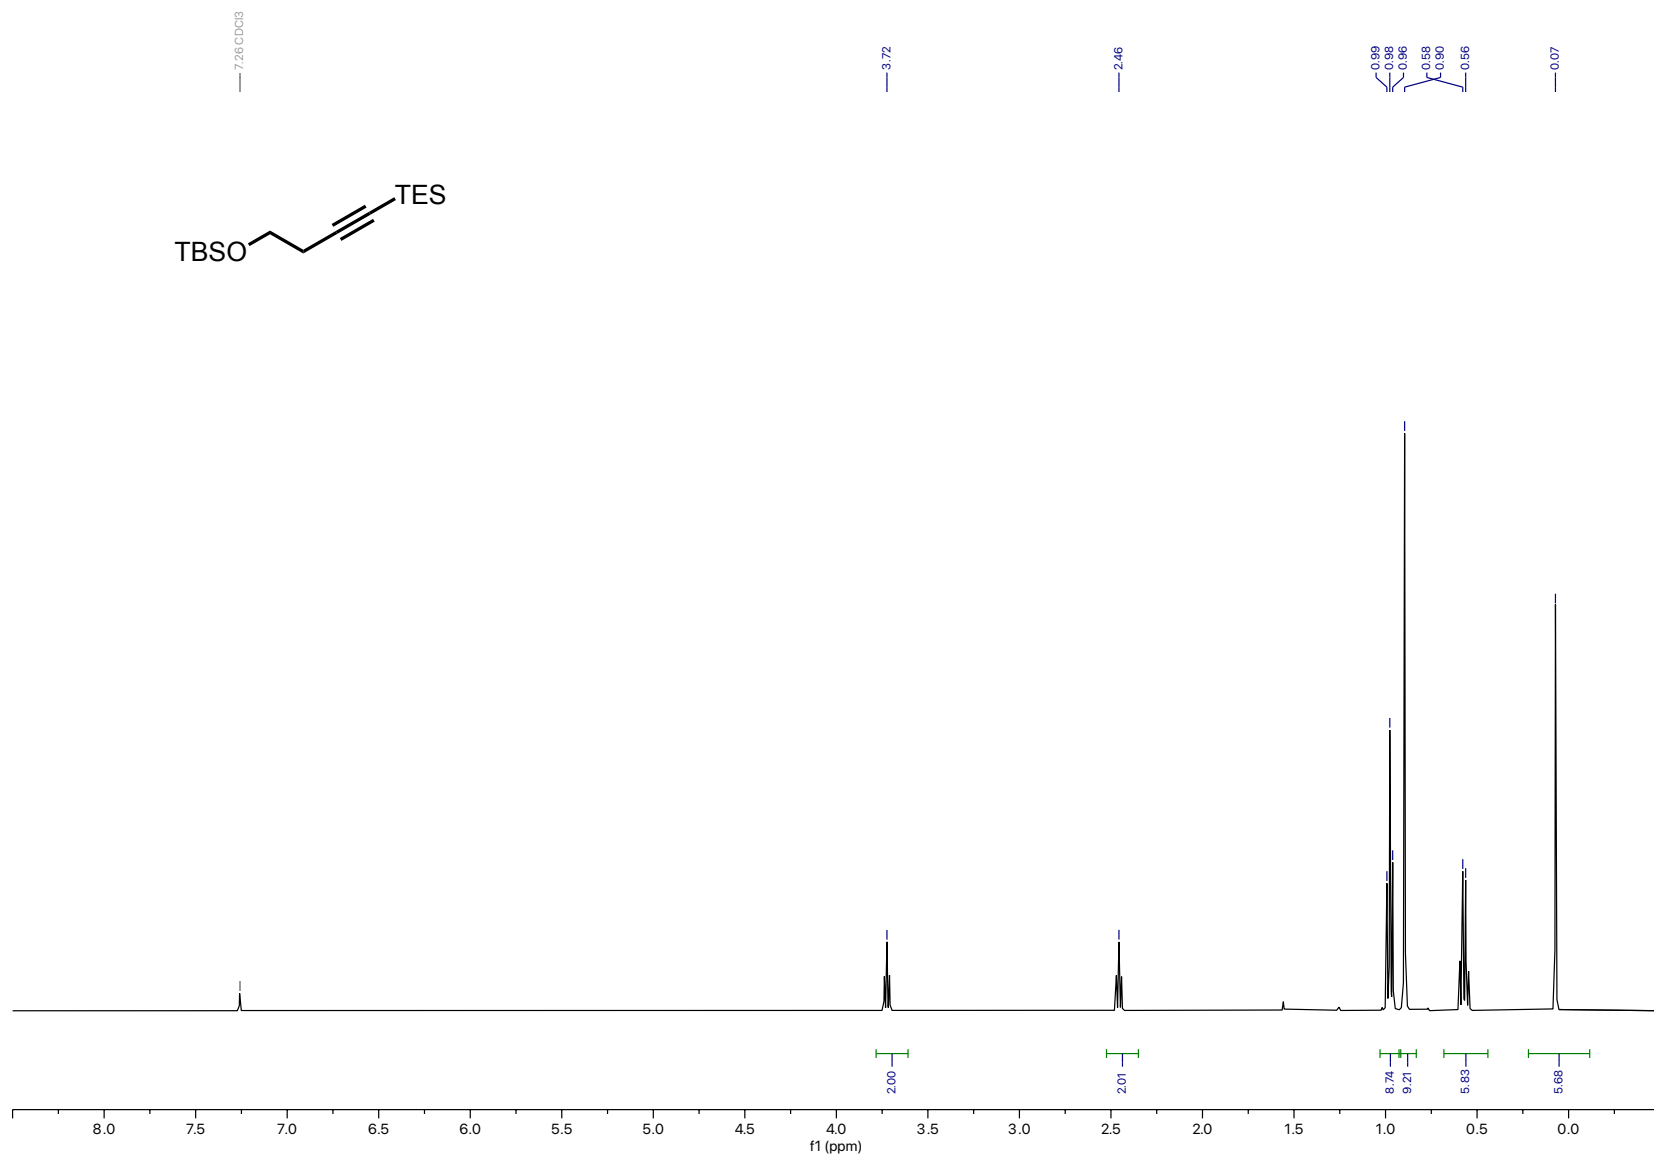

**Figure S10:** <sup>1</sup>H NMR (500 MHz, CDCl<sub>3</sub>) for alkyne **12**

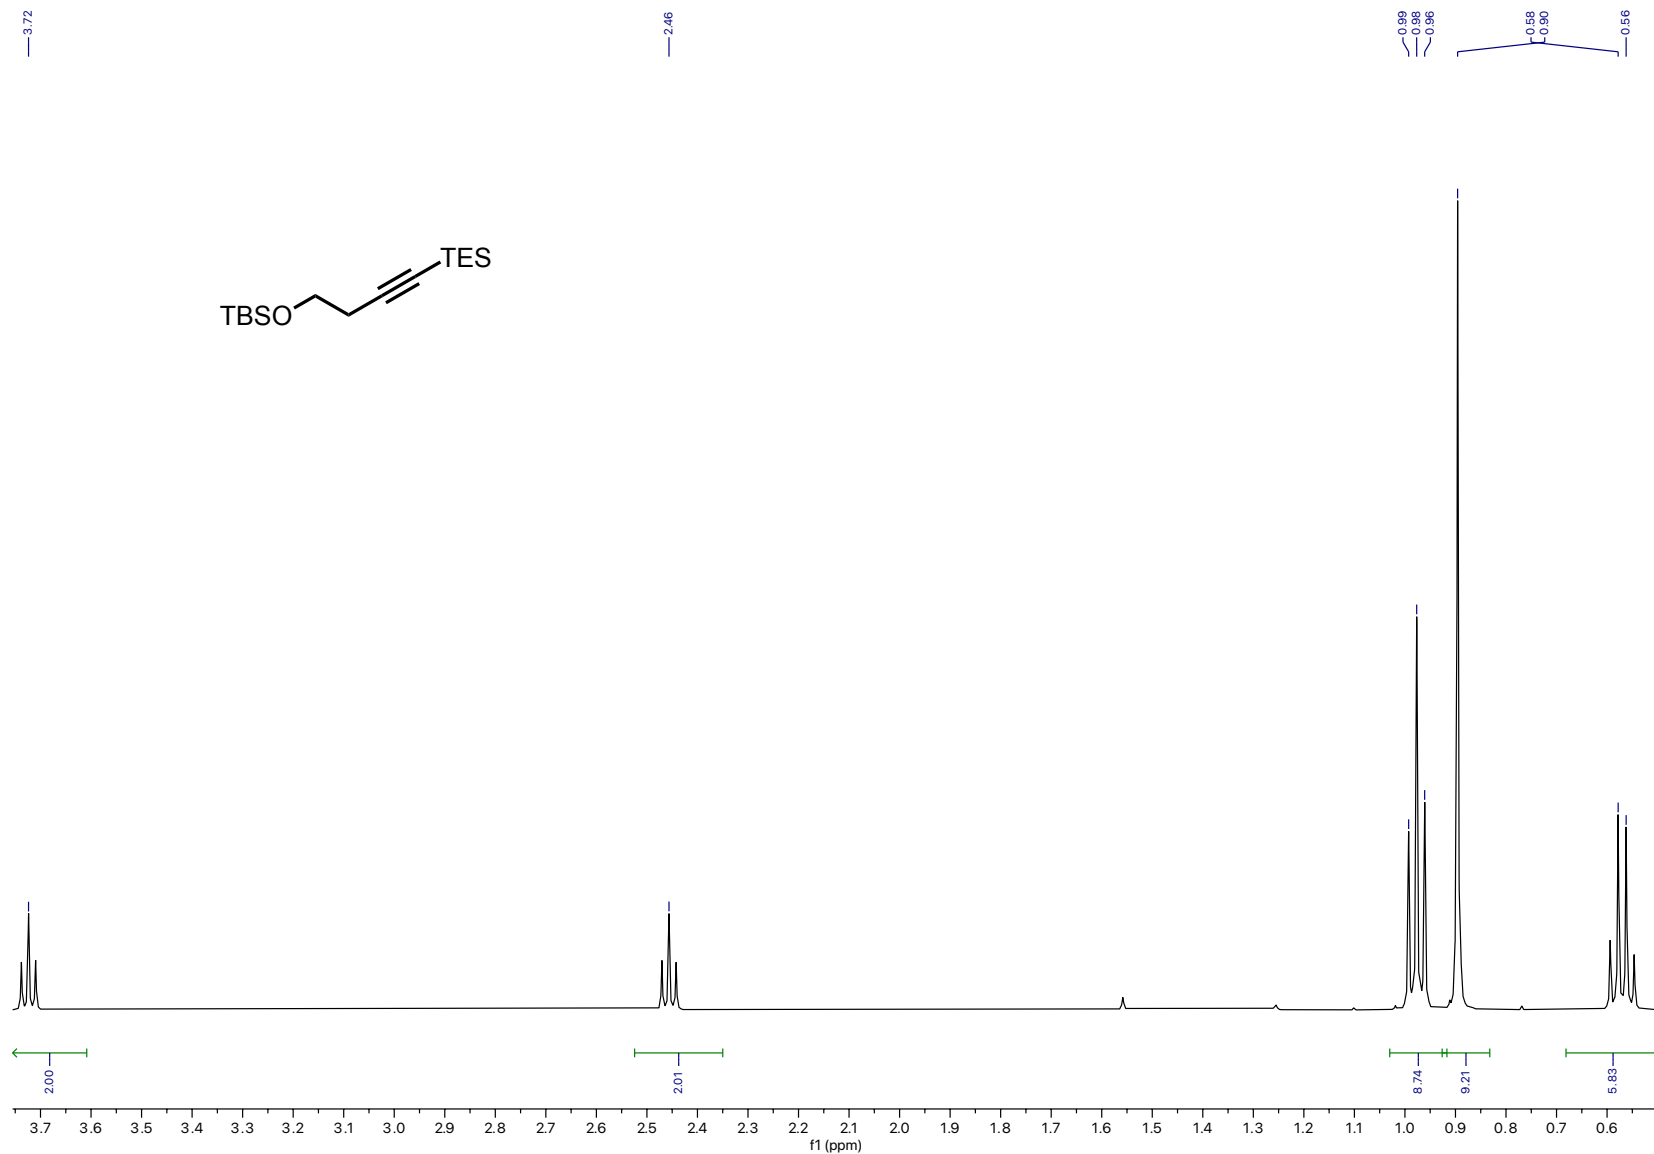

Figure S11: <sup>1</sup>H NMR (500 MHz, CDCl<sub>3</sub>) for alkyne **12** (3.75-0.5 ppm inset)



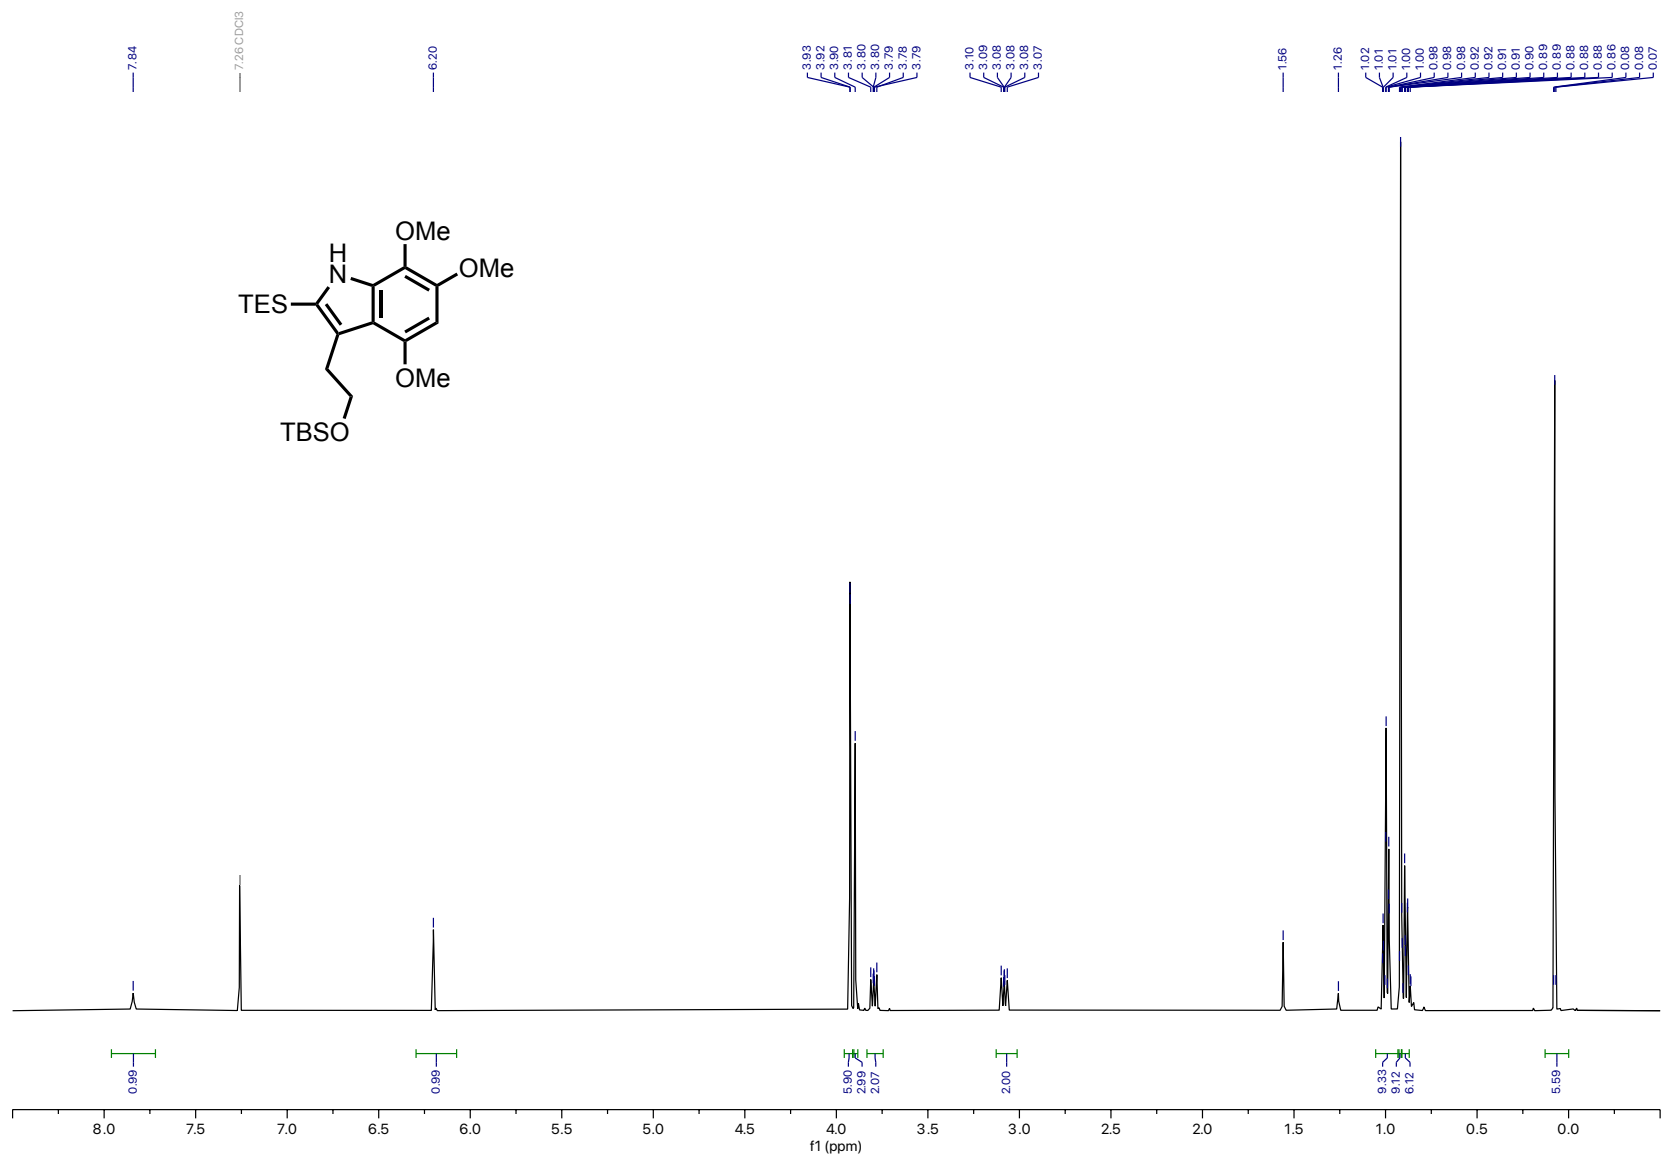

**Figure S13:**  $^1\text{H NMR}$  (500 MHz,  $\text{CDCl}_3$ ) for trimethoxyindole **10**

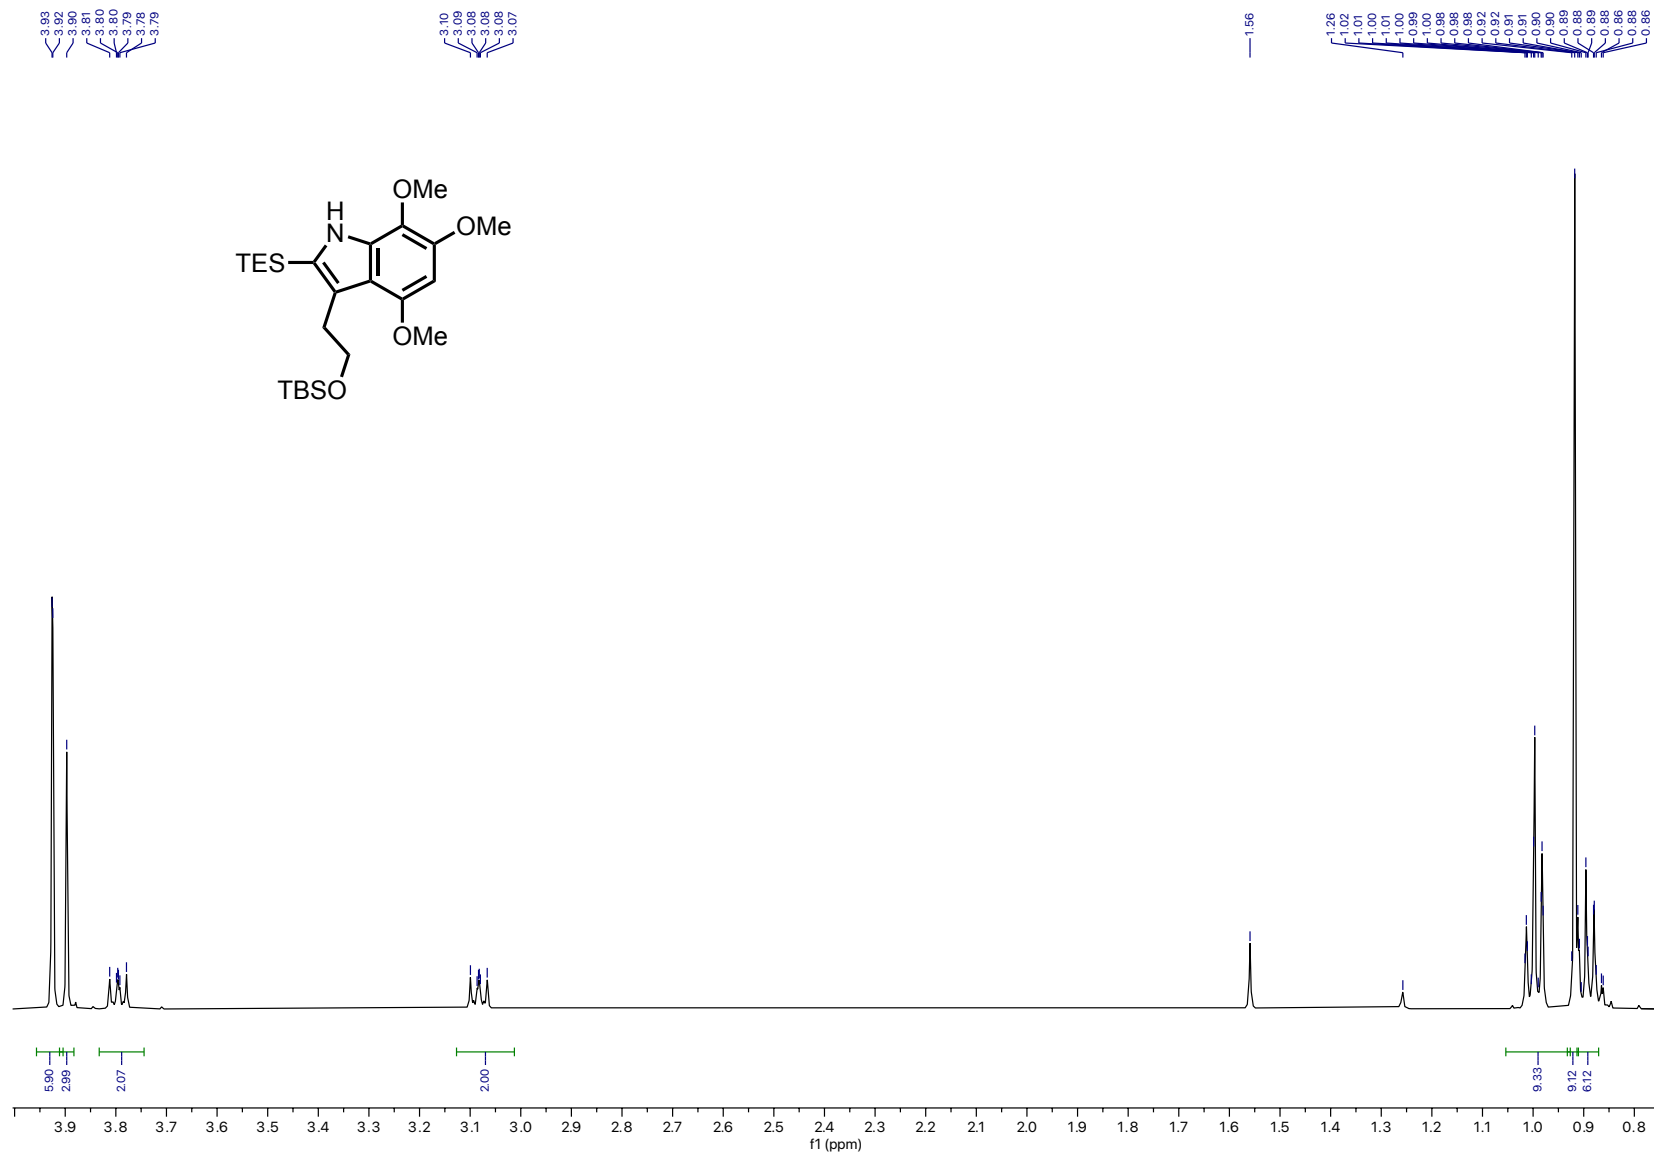

**Figure S14:**  $^1\text{H NMR}$  (500 MHz,  $\text{CDCl}_3$ ) for trimethoxyindole **10** (4.0-0.75 ppm inset)

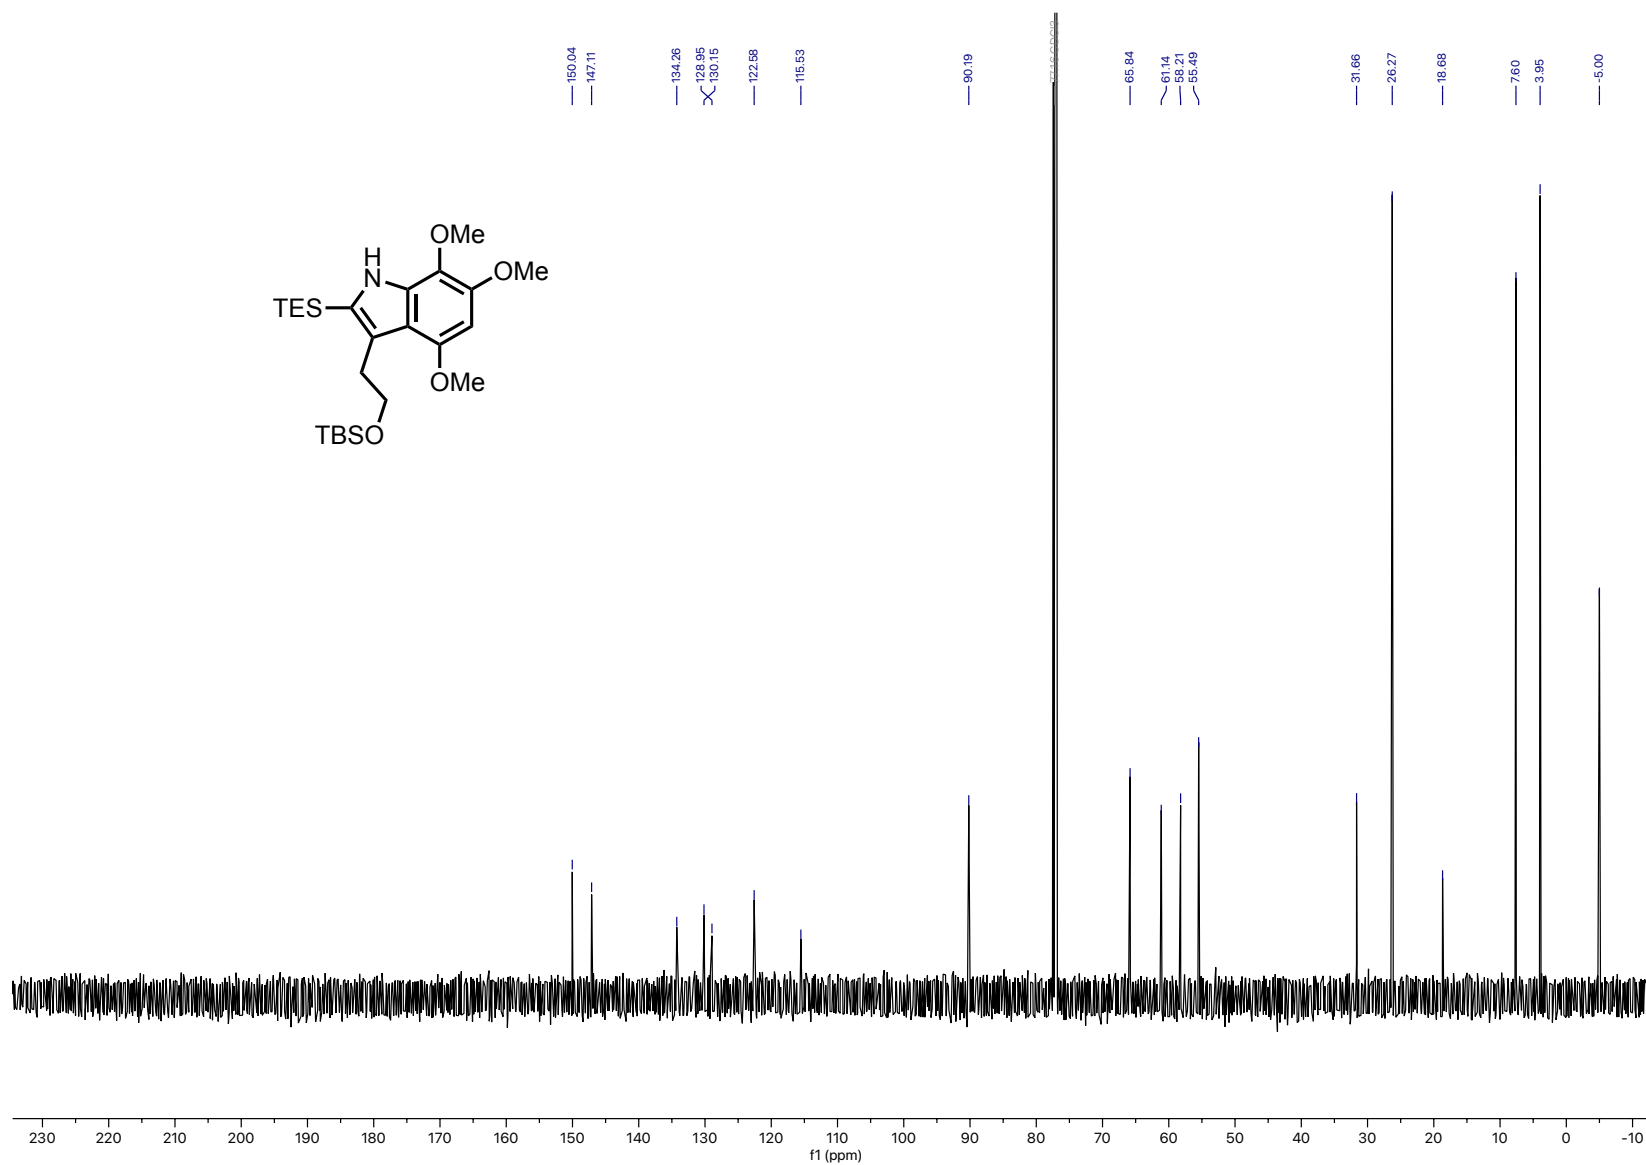

**Figure S15:**  $^{13}\text{C}$  NMR (126 MHz,  $\text{CDCl}_3$ ) for trimethoxyindole **10**

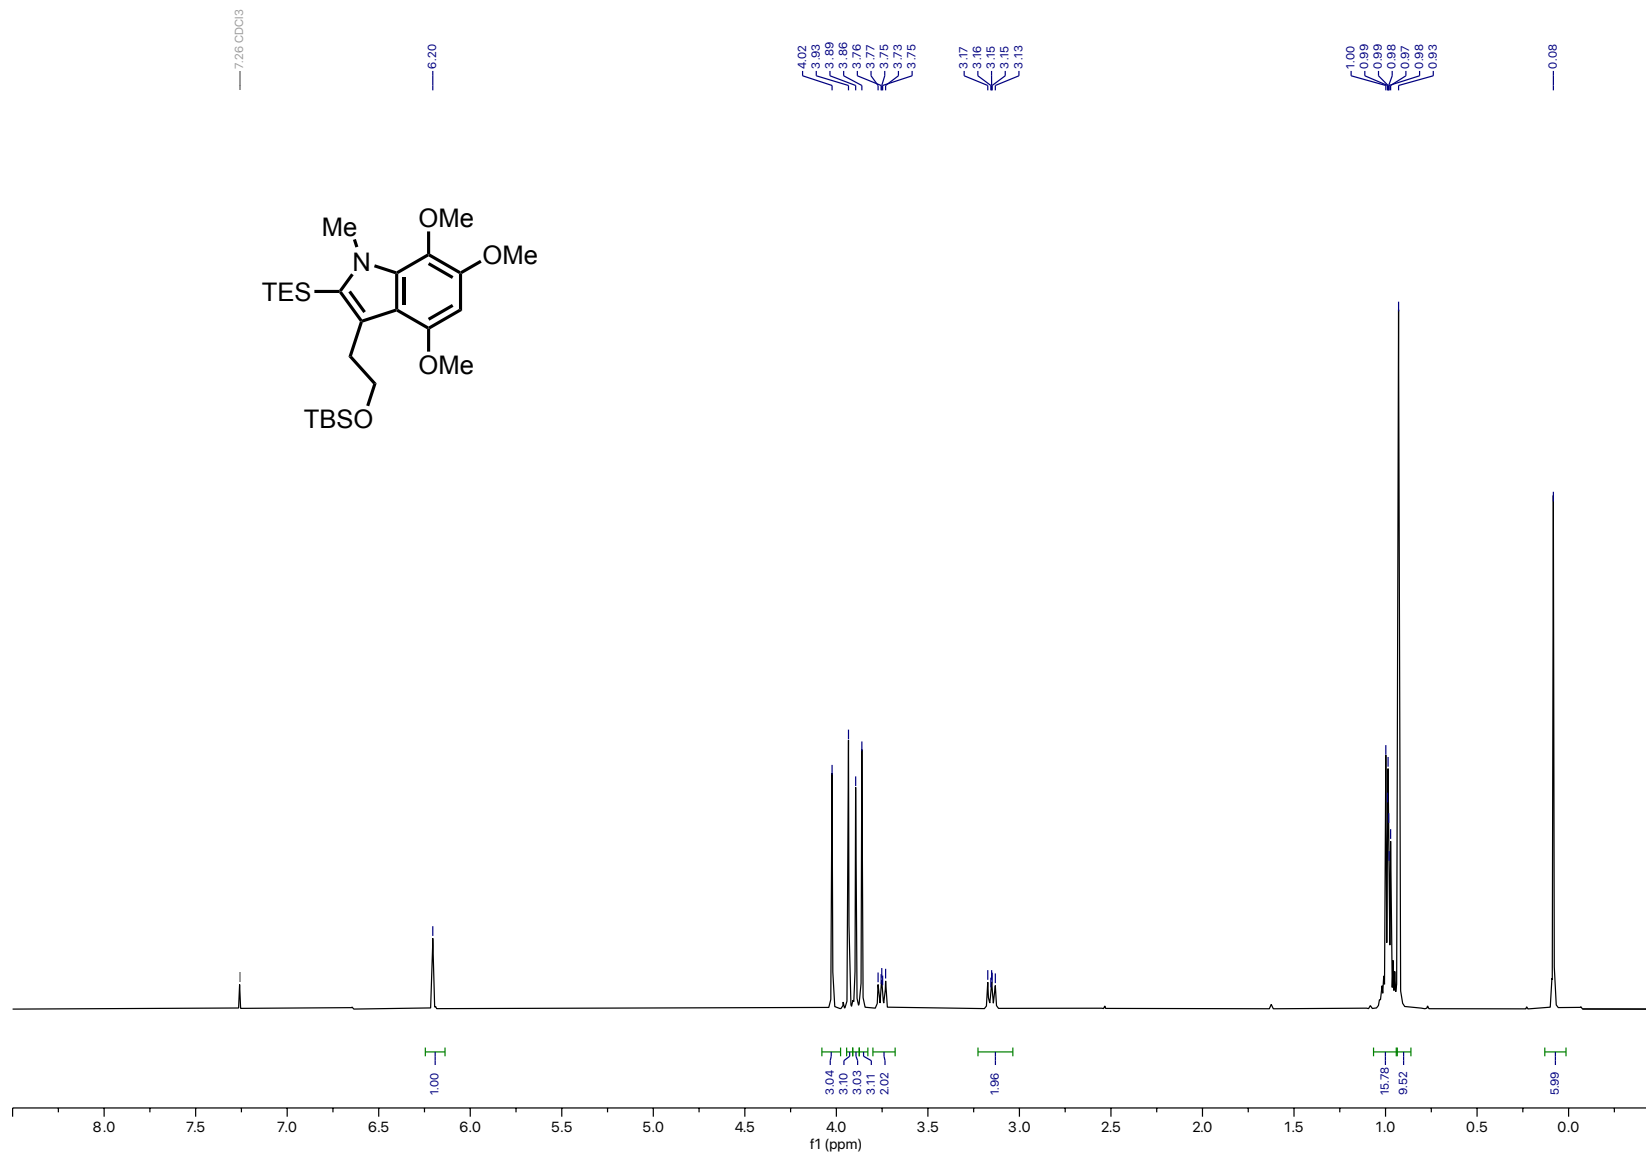

Figure S16: <sup>1</sup>H NMR (400 MHz, CDCl<sub>3</sub>) for N-methylindole **19**



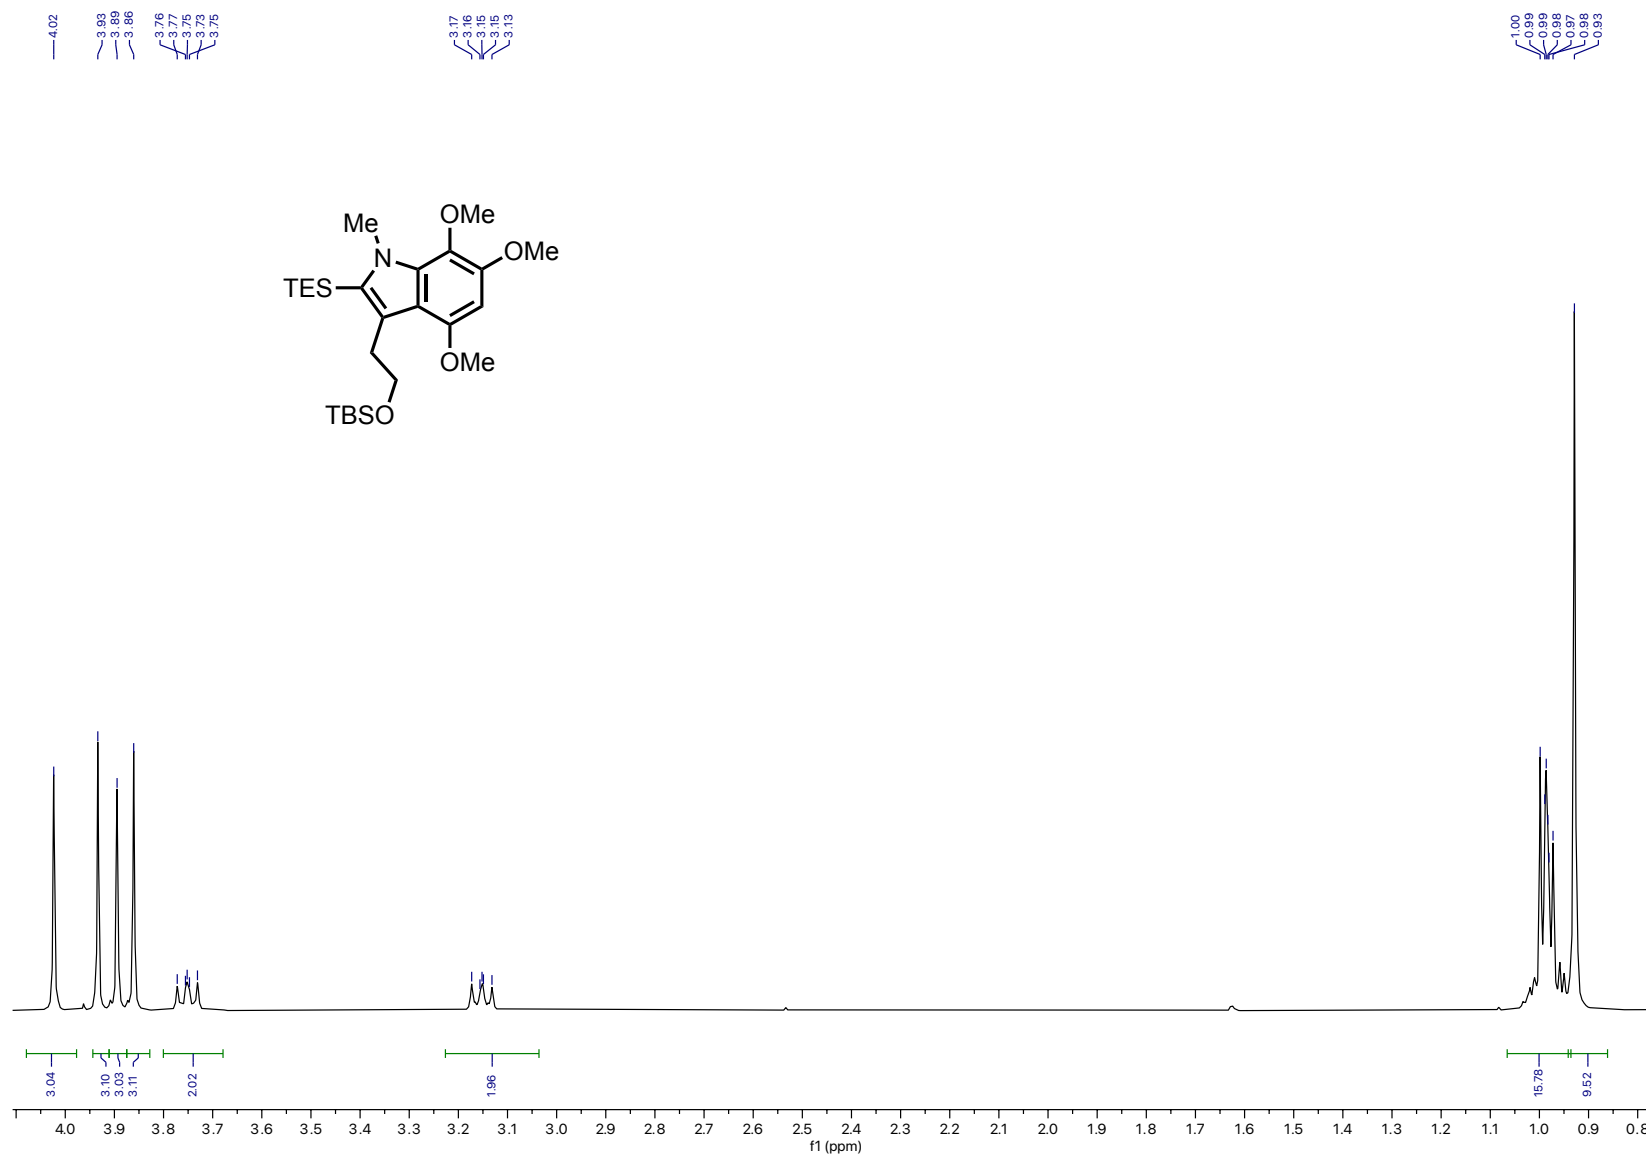

**Figure S17:** <sup>1</sup>H NMR (400 MHz, CDCl<sub>3</sub>) for N-methylindole **19** (4.20-0.75 ppm inset)

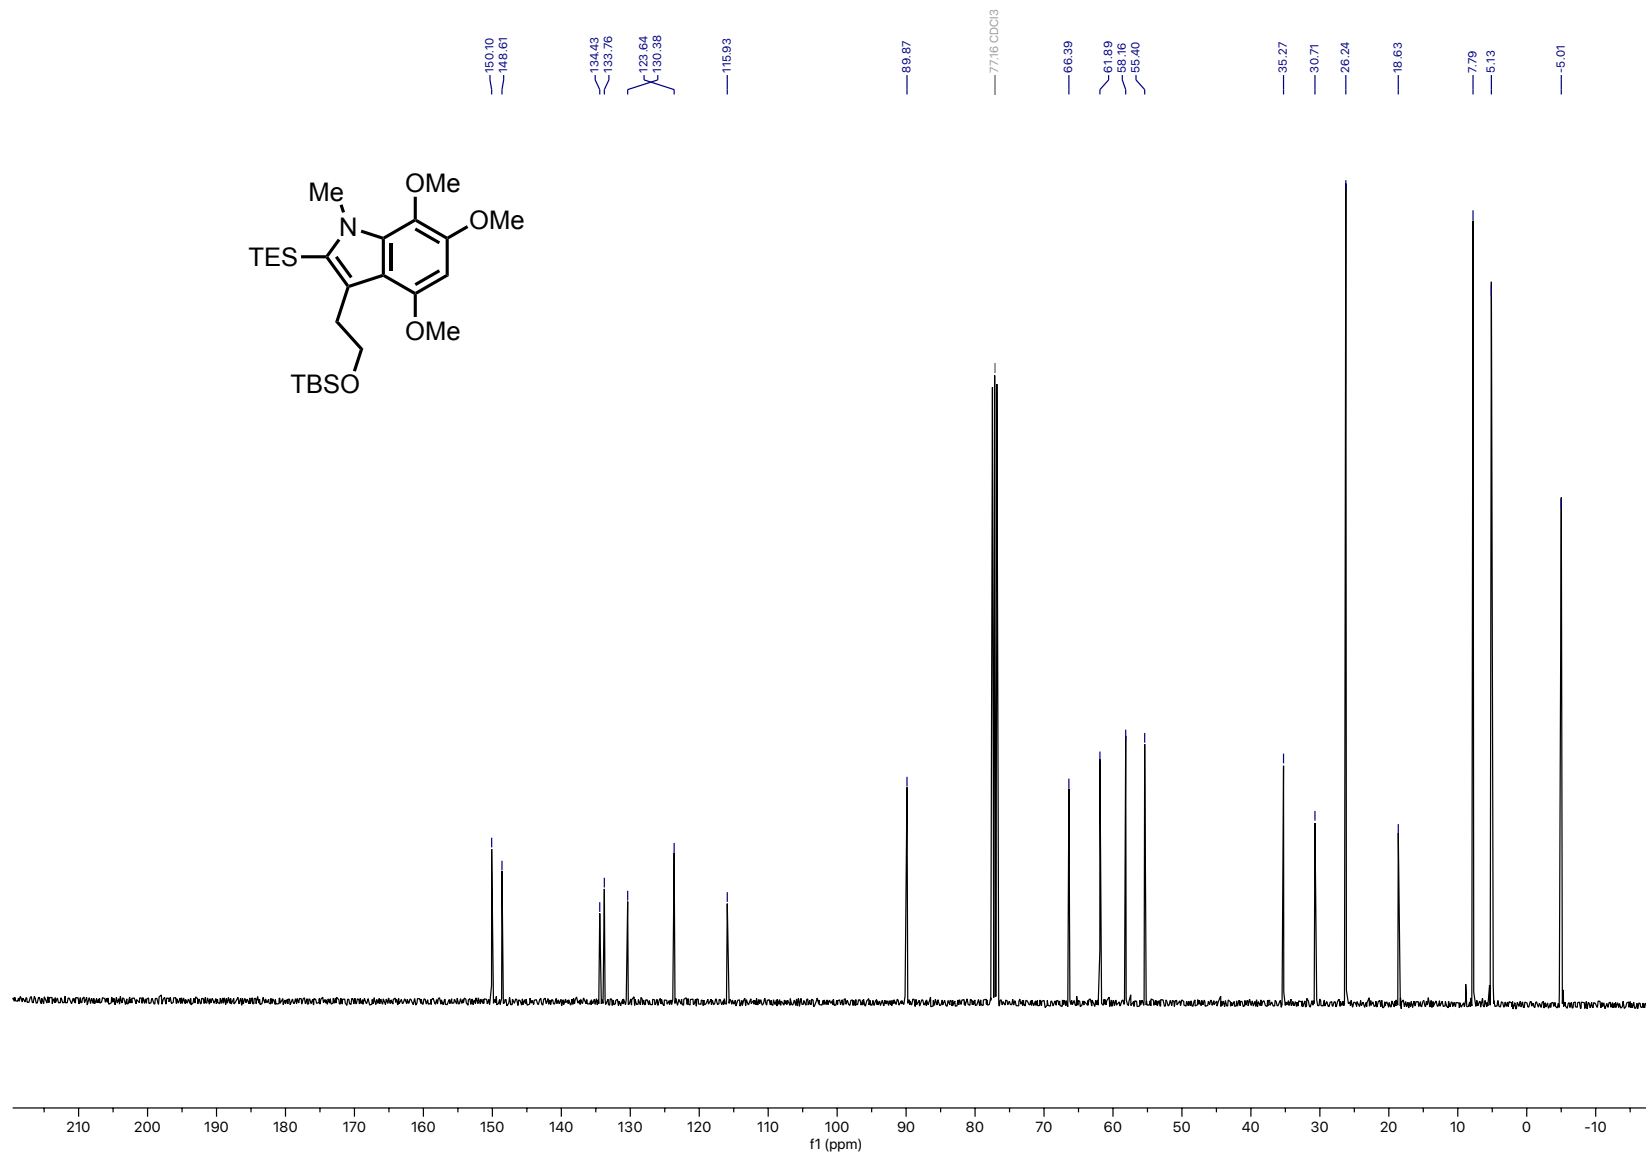

Figure S18:  $^{13}\text{C}$  NMR (101 MHz,  $\text{CDCl}_3$ ) for N-methylindole **19**

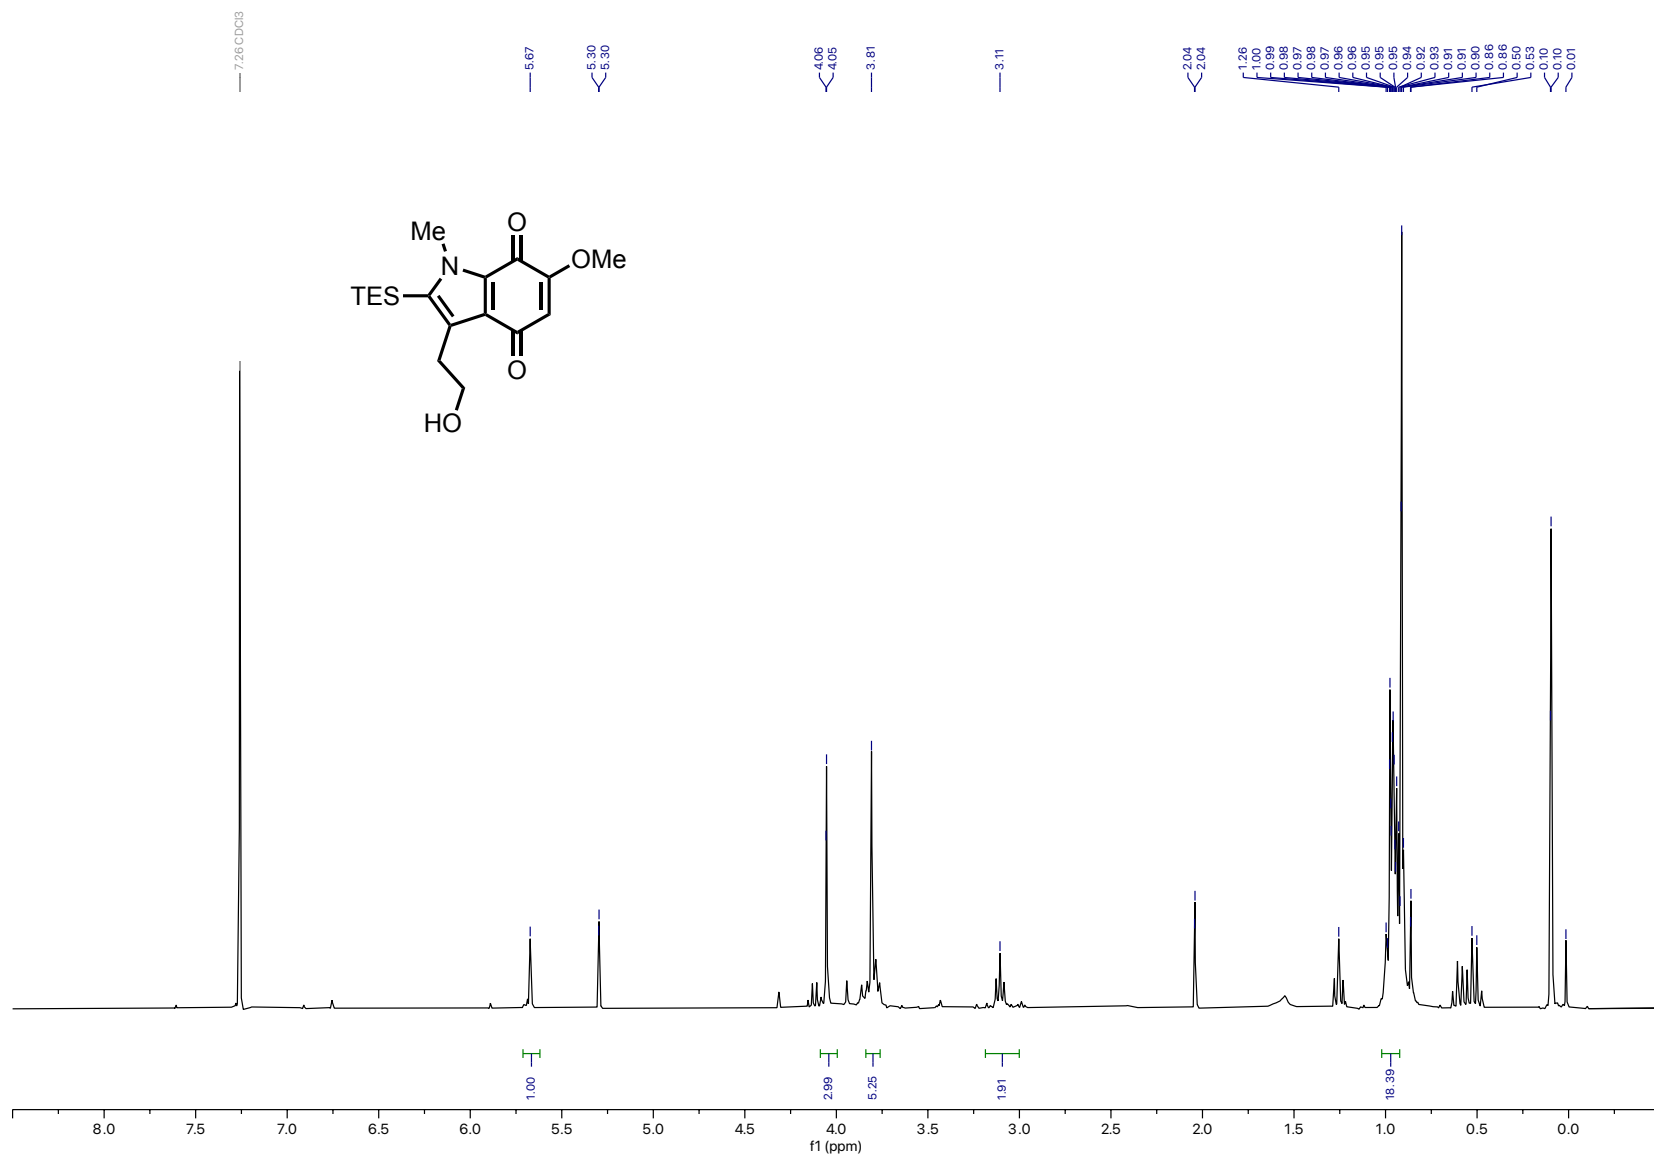

**Figure S19:** <sup>1</sup>H NMR (300 MHz, CDCl<sub>3</sub>) for crude indoloquinone **20**

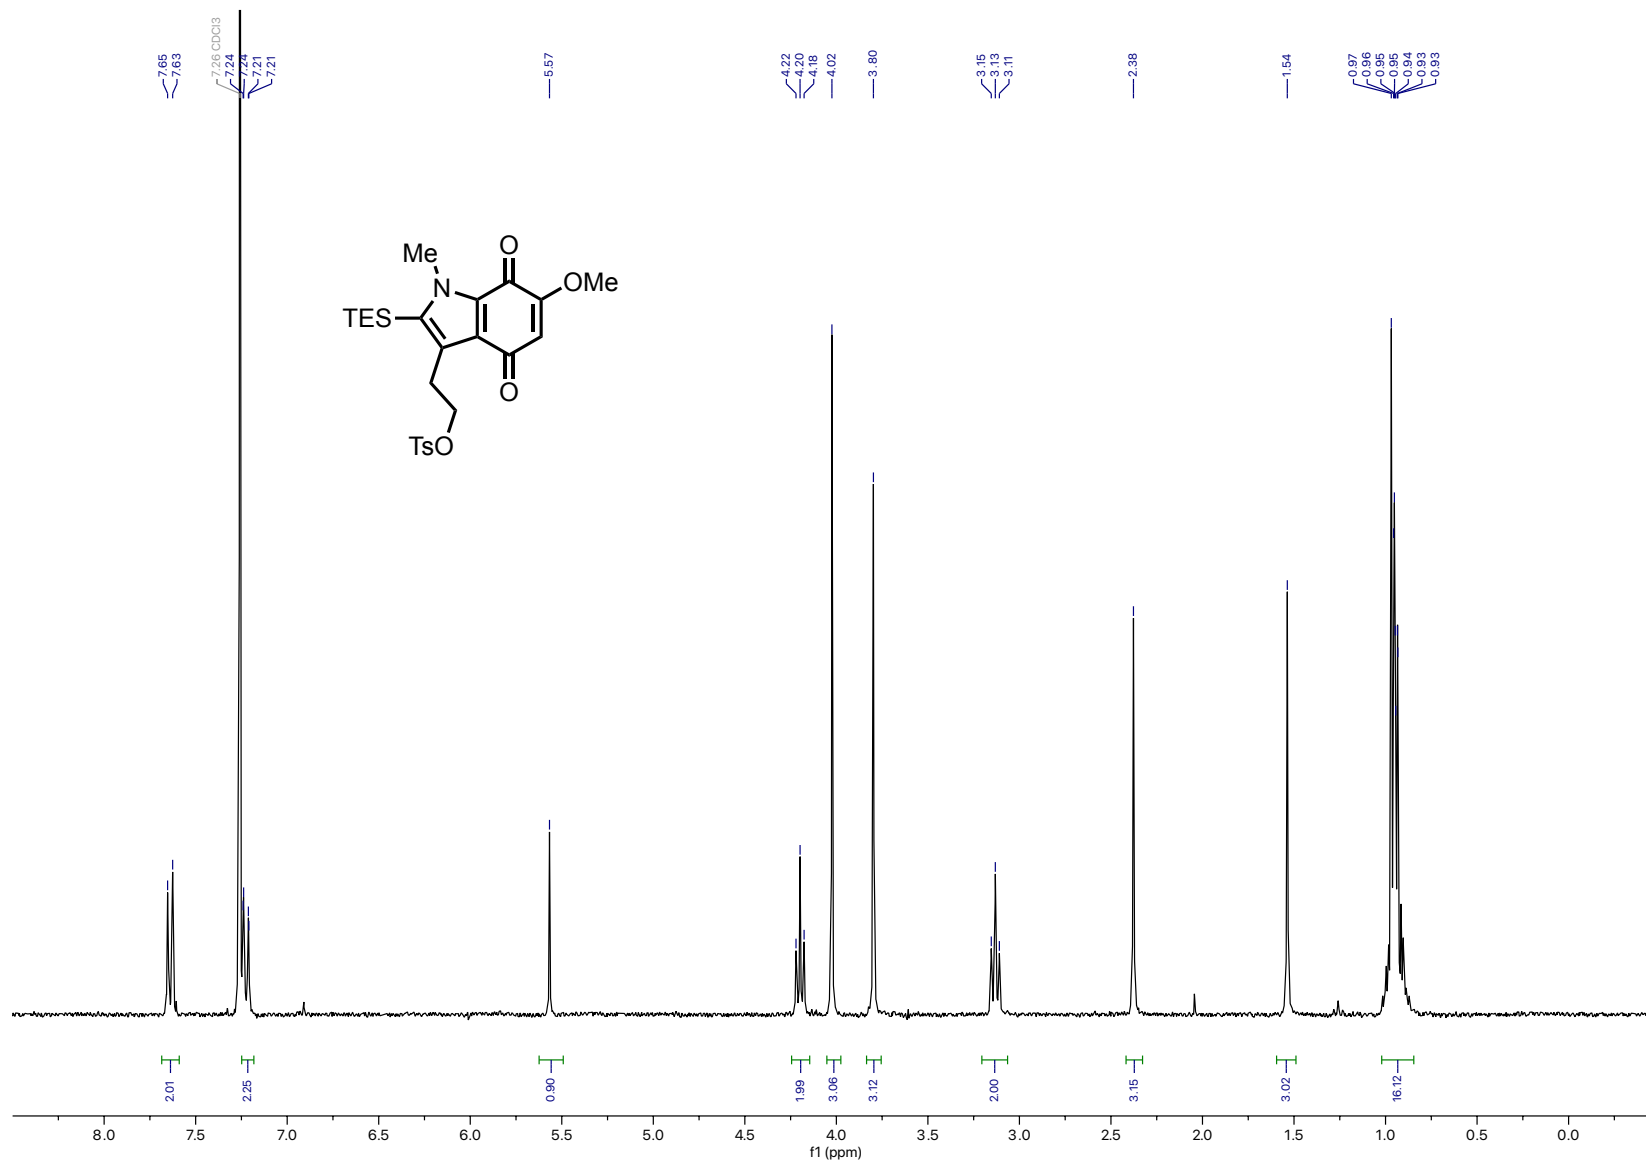

Figure S20: <sup>1</sup>H NMR (300 MHz, CDCl<sub>3</sub>) for tosylate 21

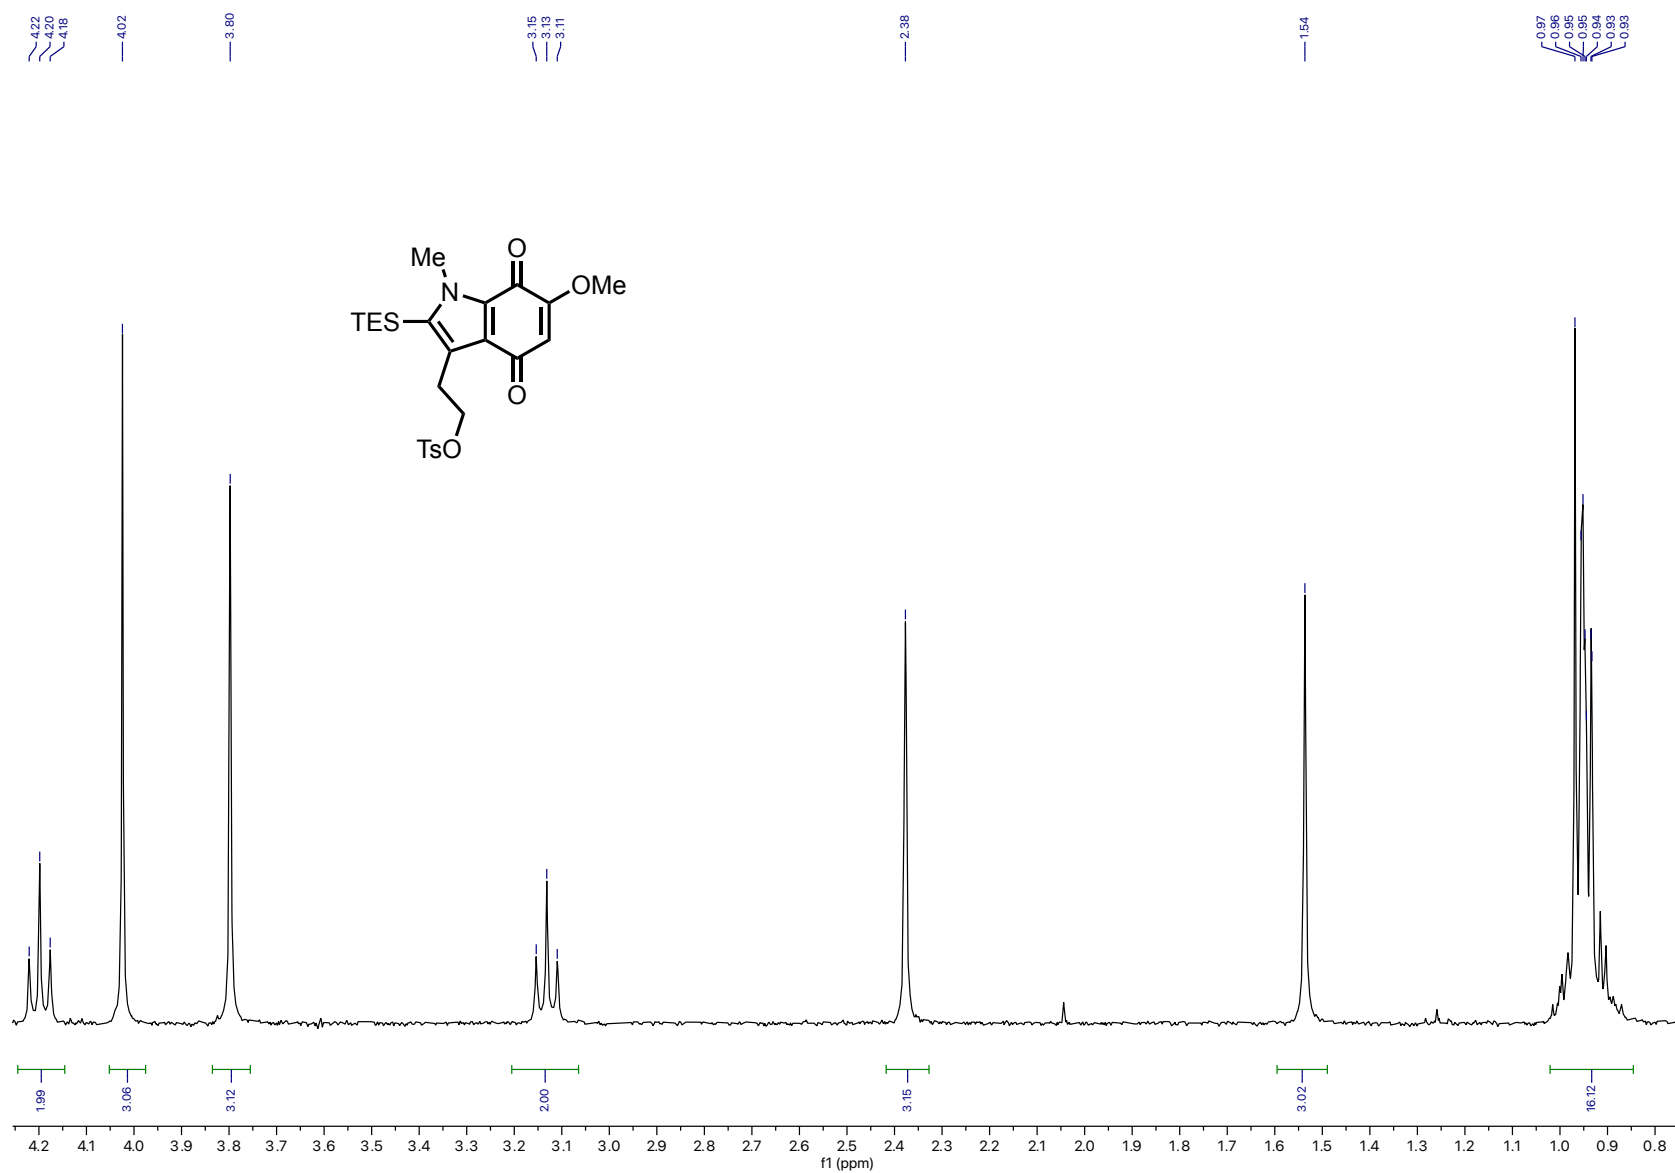

Figure S21: <sup>1</sup>H NMR (300 MHz, CDCl<sub>3</sub>) for tosylate **21** (4.25-0.75 ppm inset)

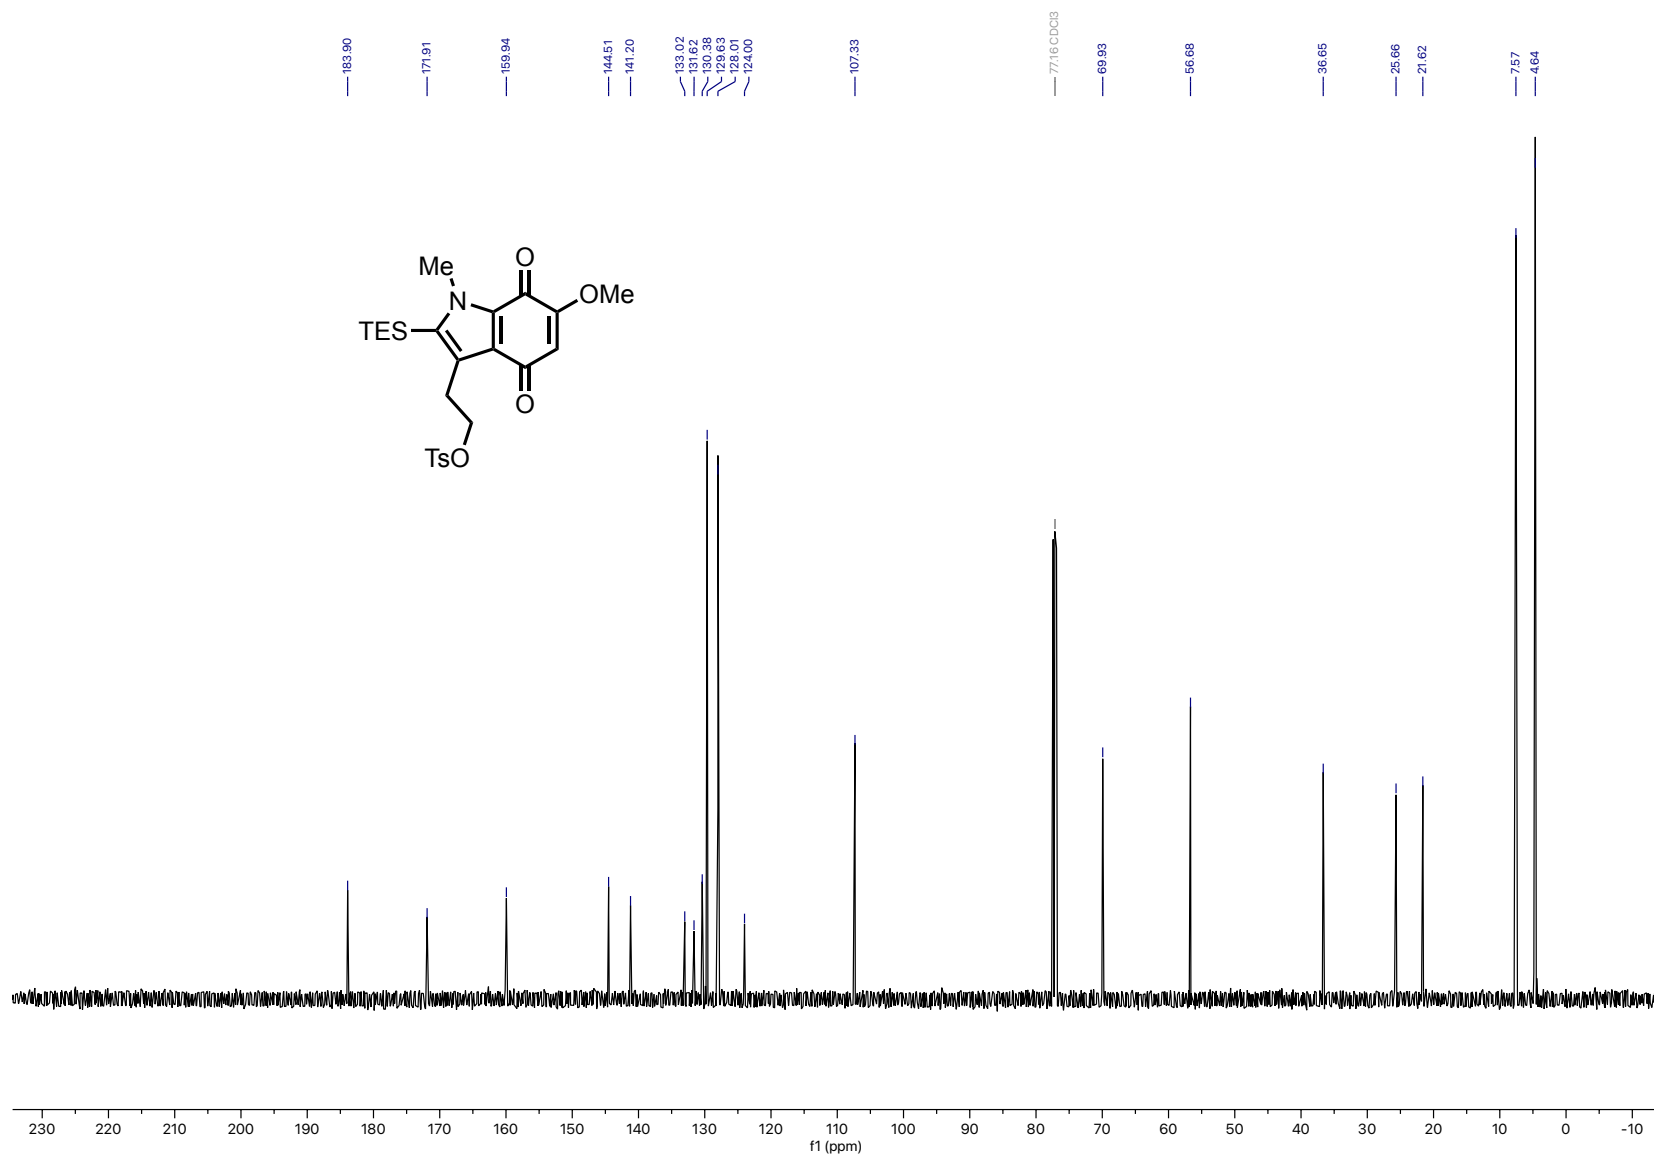

Figure S22:  $^{13}\text{C}$  NMR (126 MHz,  $\text{CDCl}_3$ ) for tosylate **21**

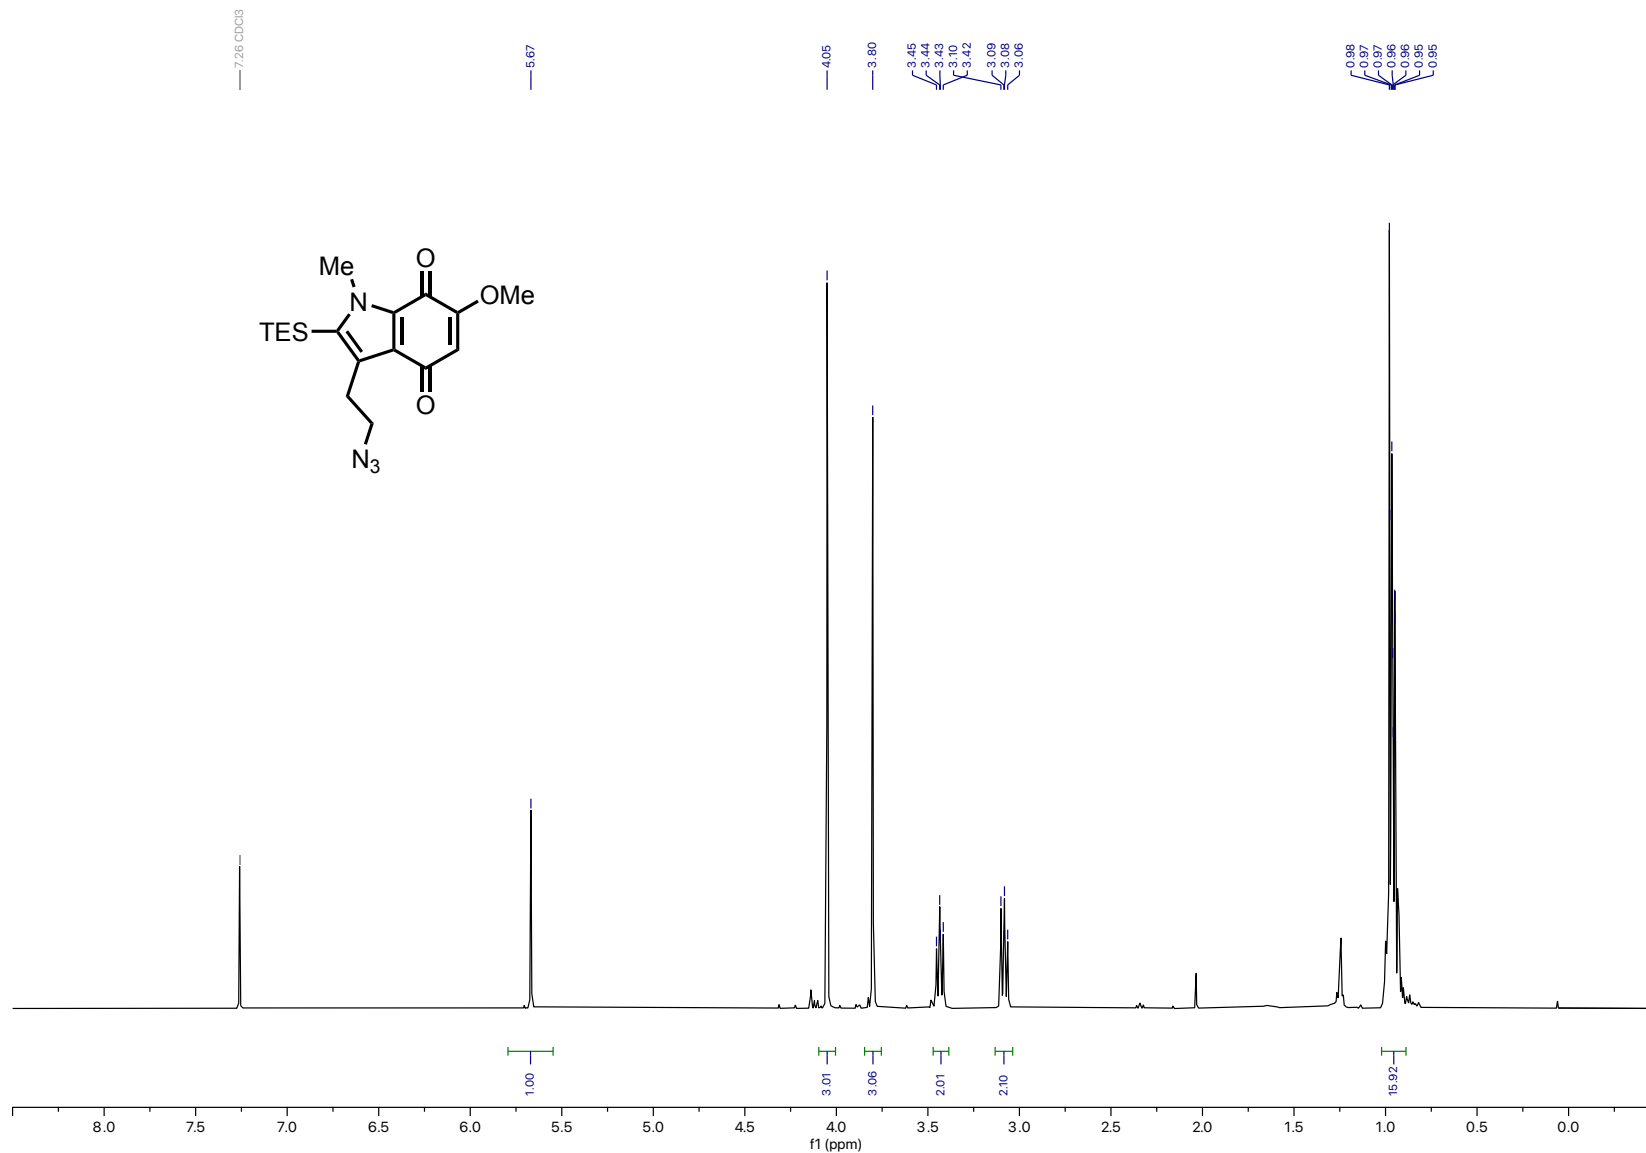

**Figure S23:** <sup>1</sup>H NMR (400 MHz, CDCl<sub>3</sub>) for azidoinodoloquinone **9**

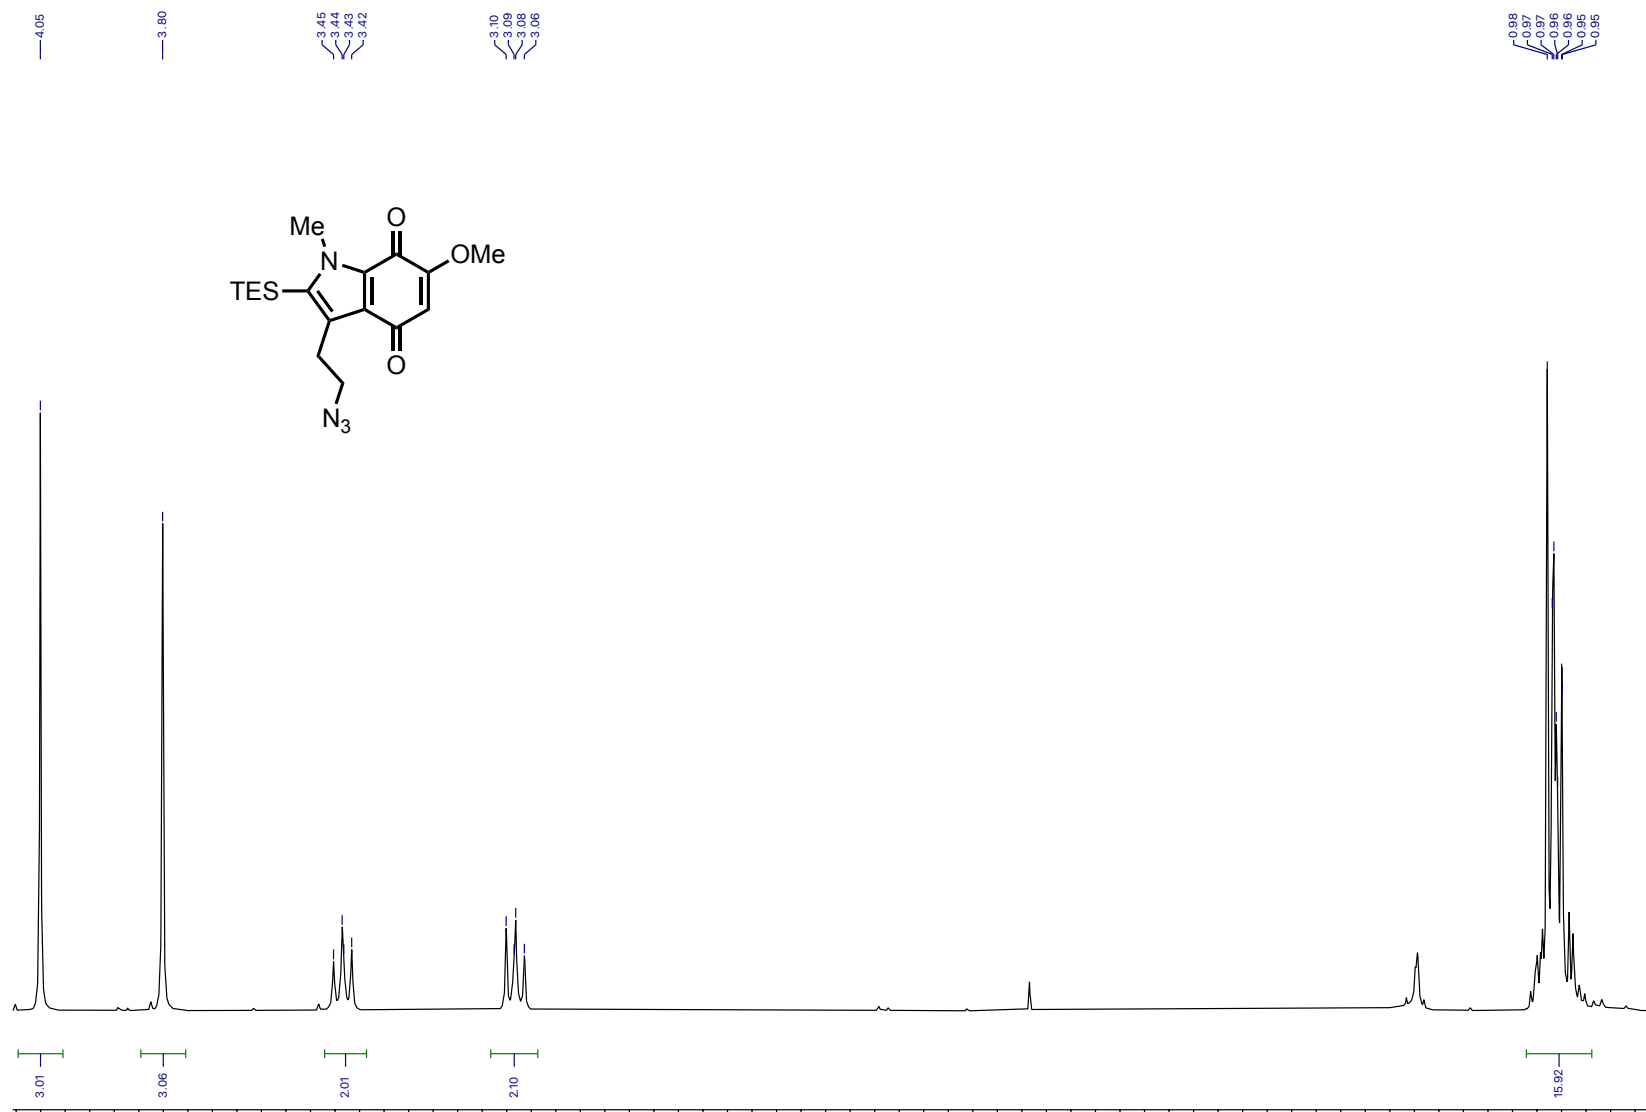

**Figure S24:** <sup>1</sup>H NMR (400 MHz, CDCl<sub>3</sub>) for azidoindoloquinone **9** (4.10-0.75 ppm inset)



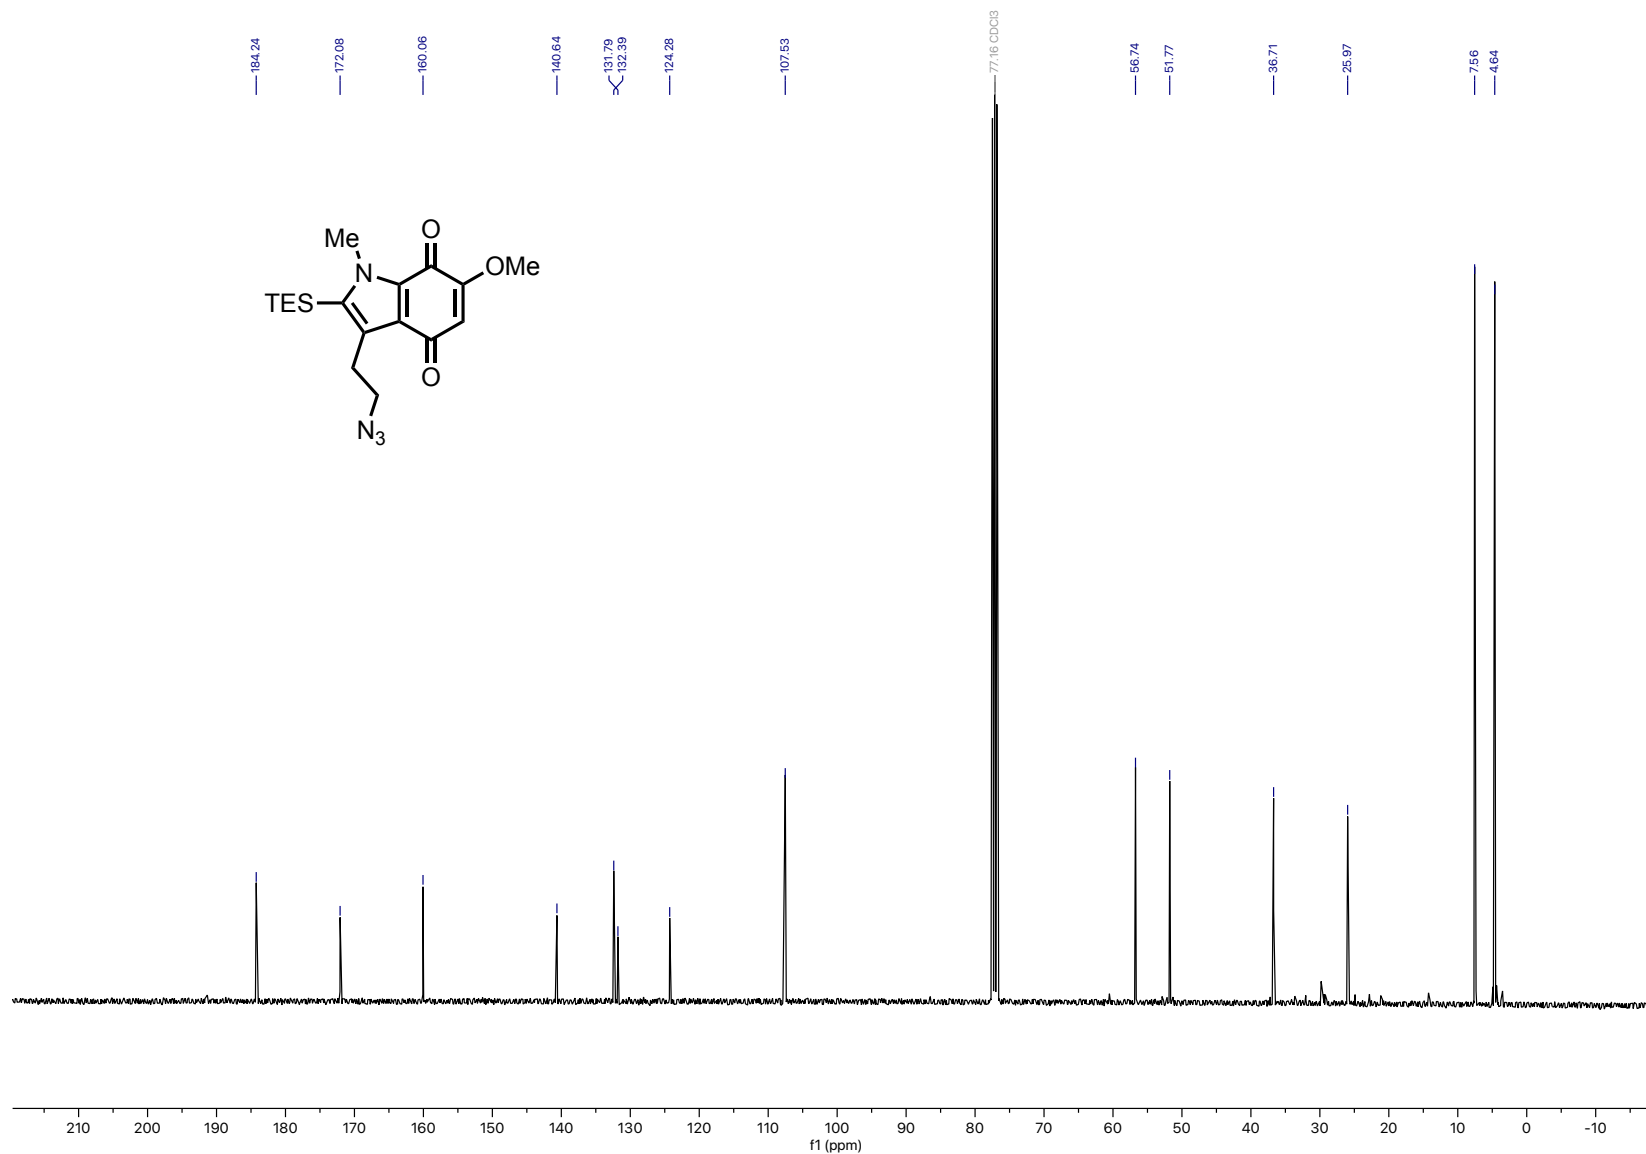

Figure S25: <sup>13</sup>C NMR (101 MHz, CDCl<sub>3</sub>) for azidoindoloquinone **9**

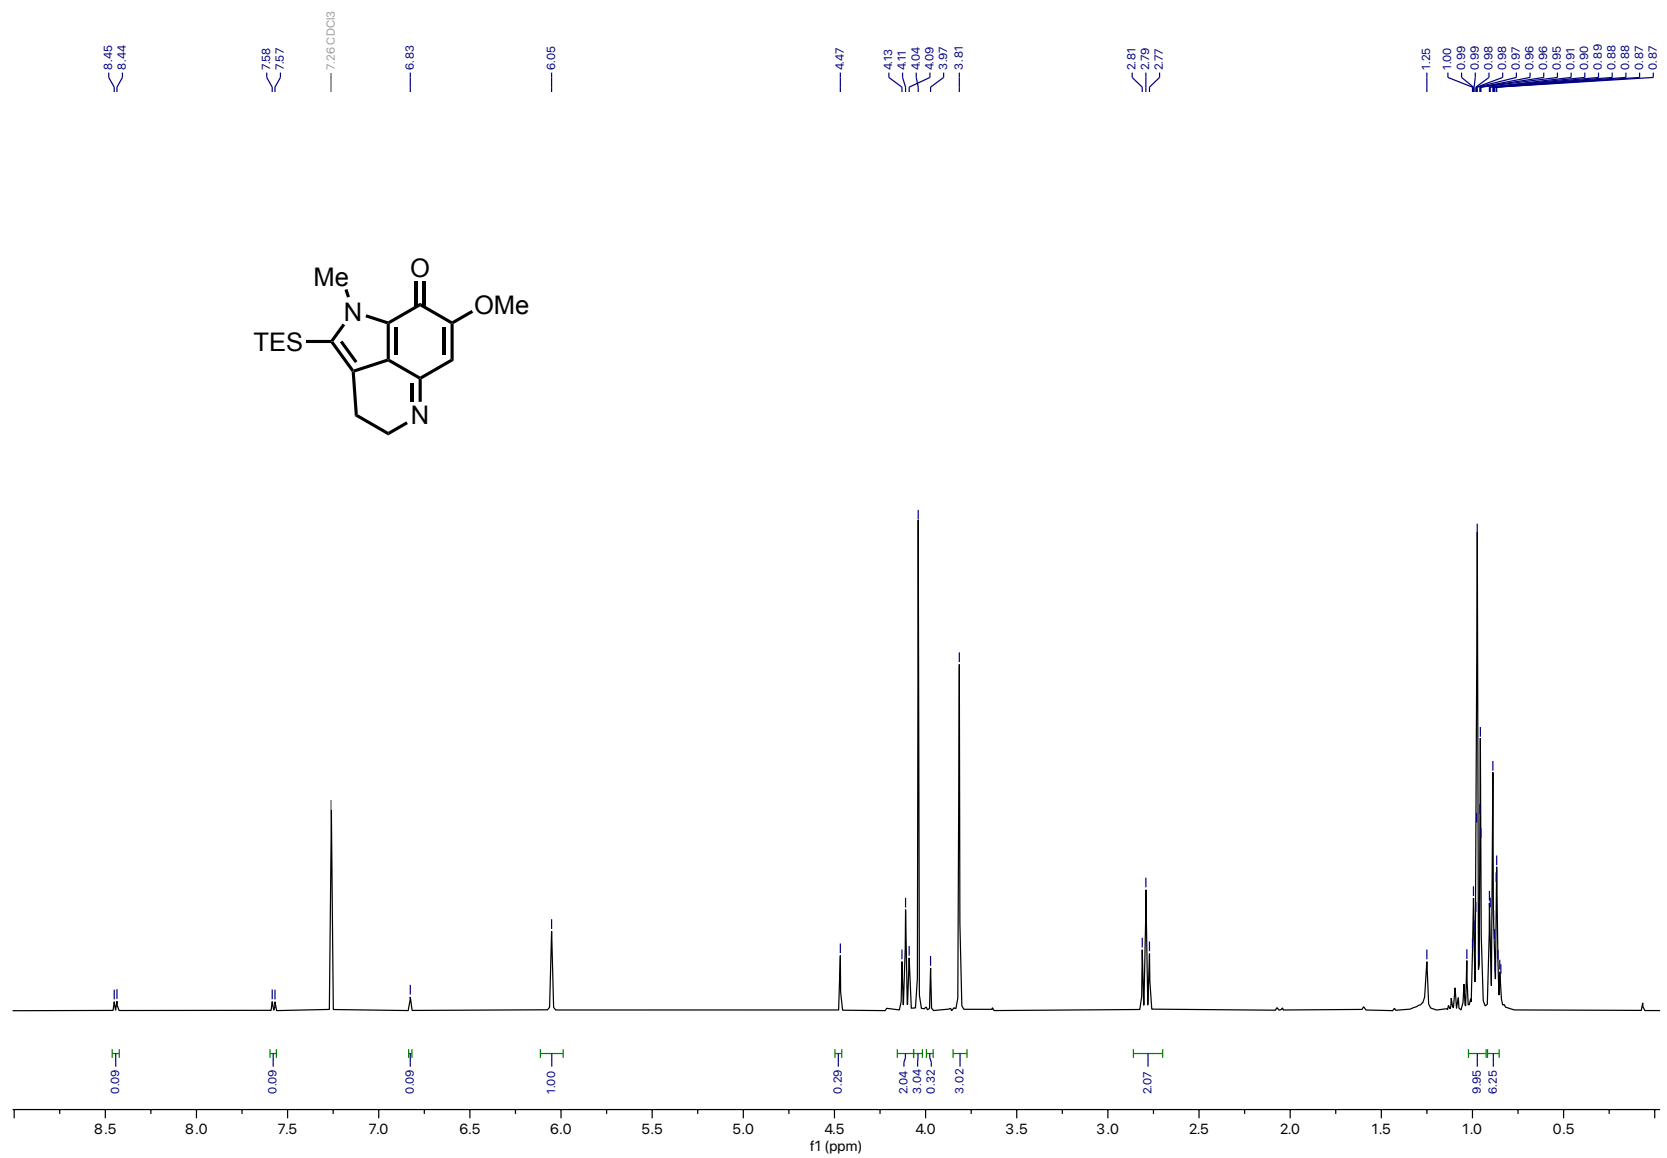

Figure S26: <sup>1</sup>H NMR (400 MHz, CDCl<sub>3</sub>) for vinylogous imidate **6b**

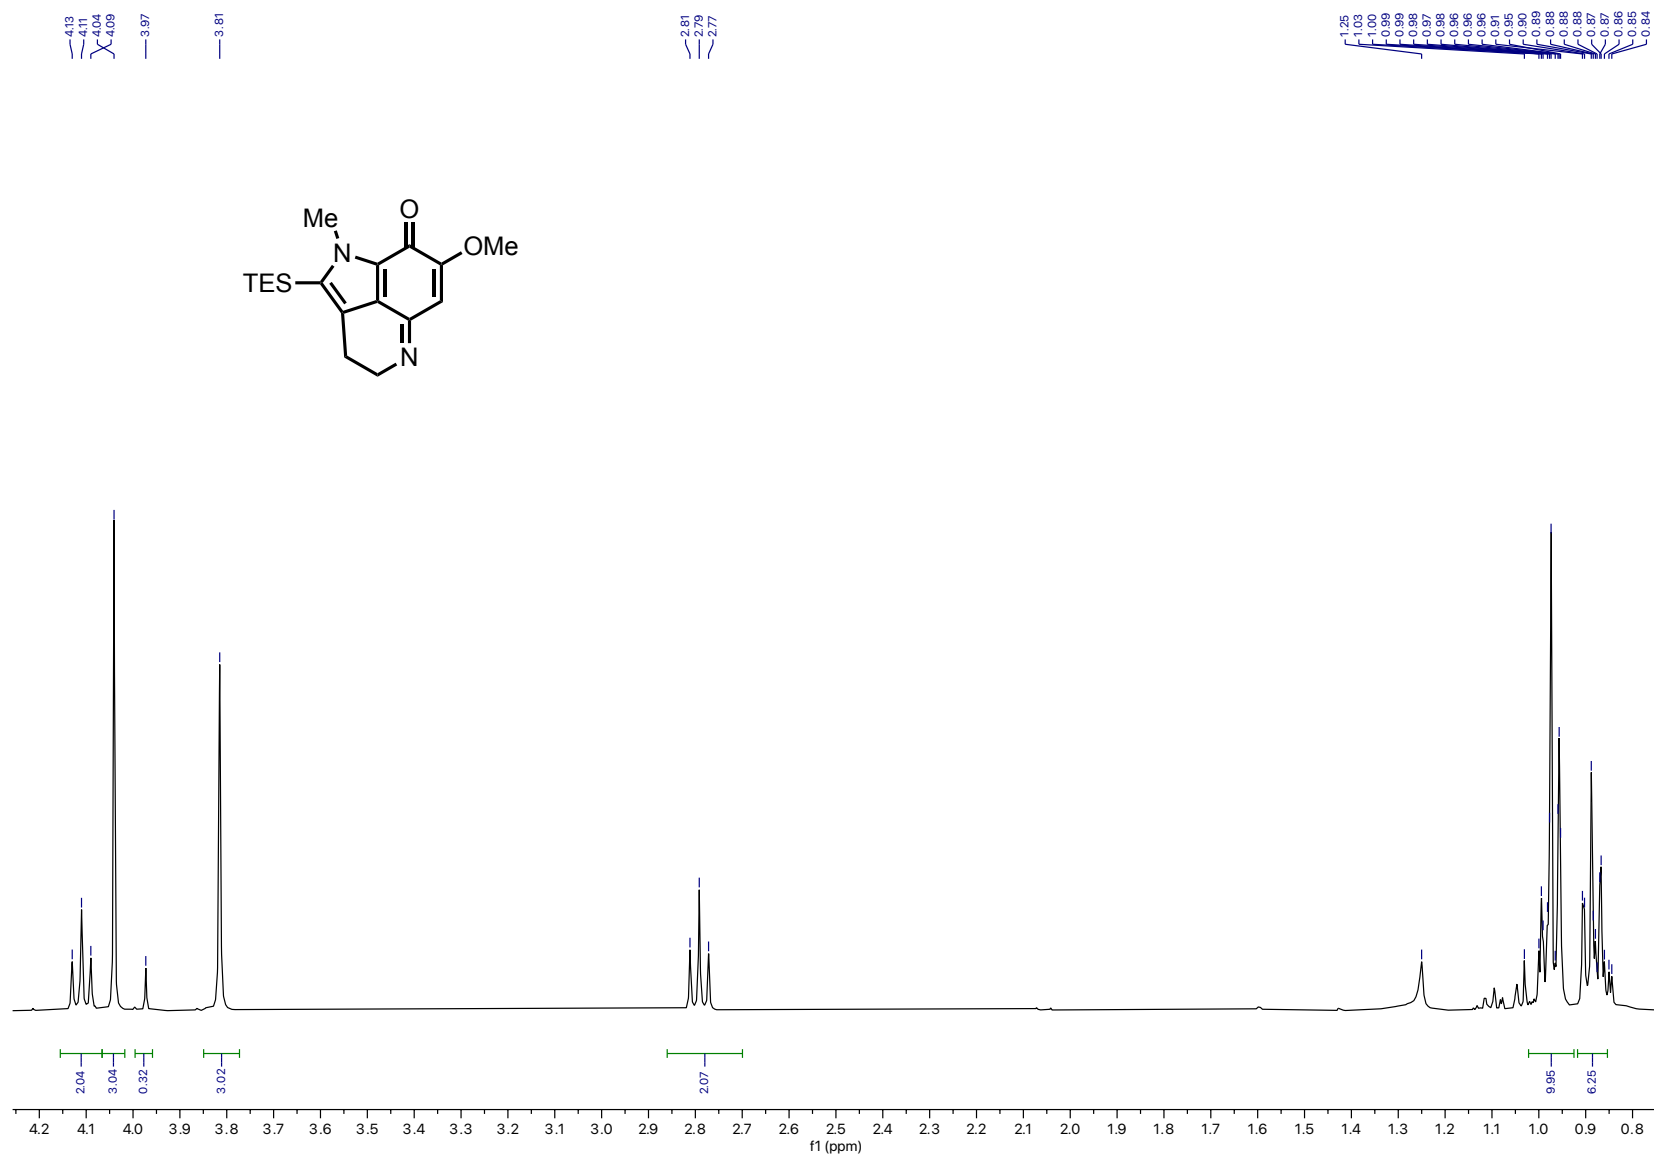

**Figure S27:** <sup>1</sup>H NMR (400 MHz, CDCl<sub>3</sub>) for vinyllogous imidate **6b** (4.25-0.75 ppm inset)

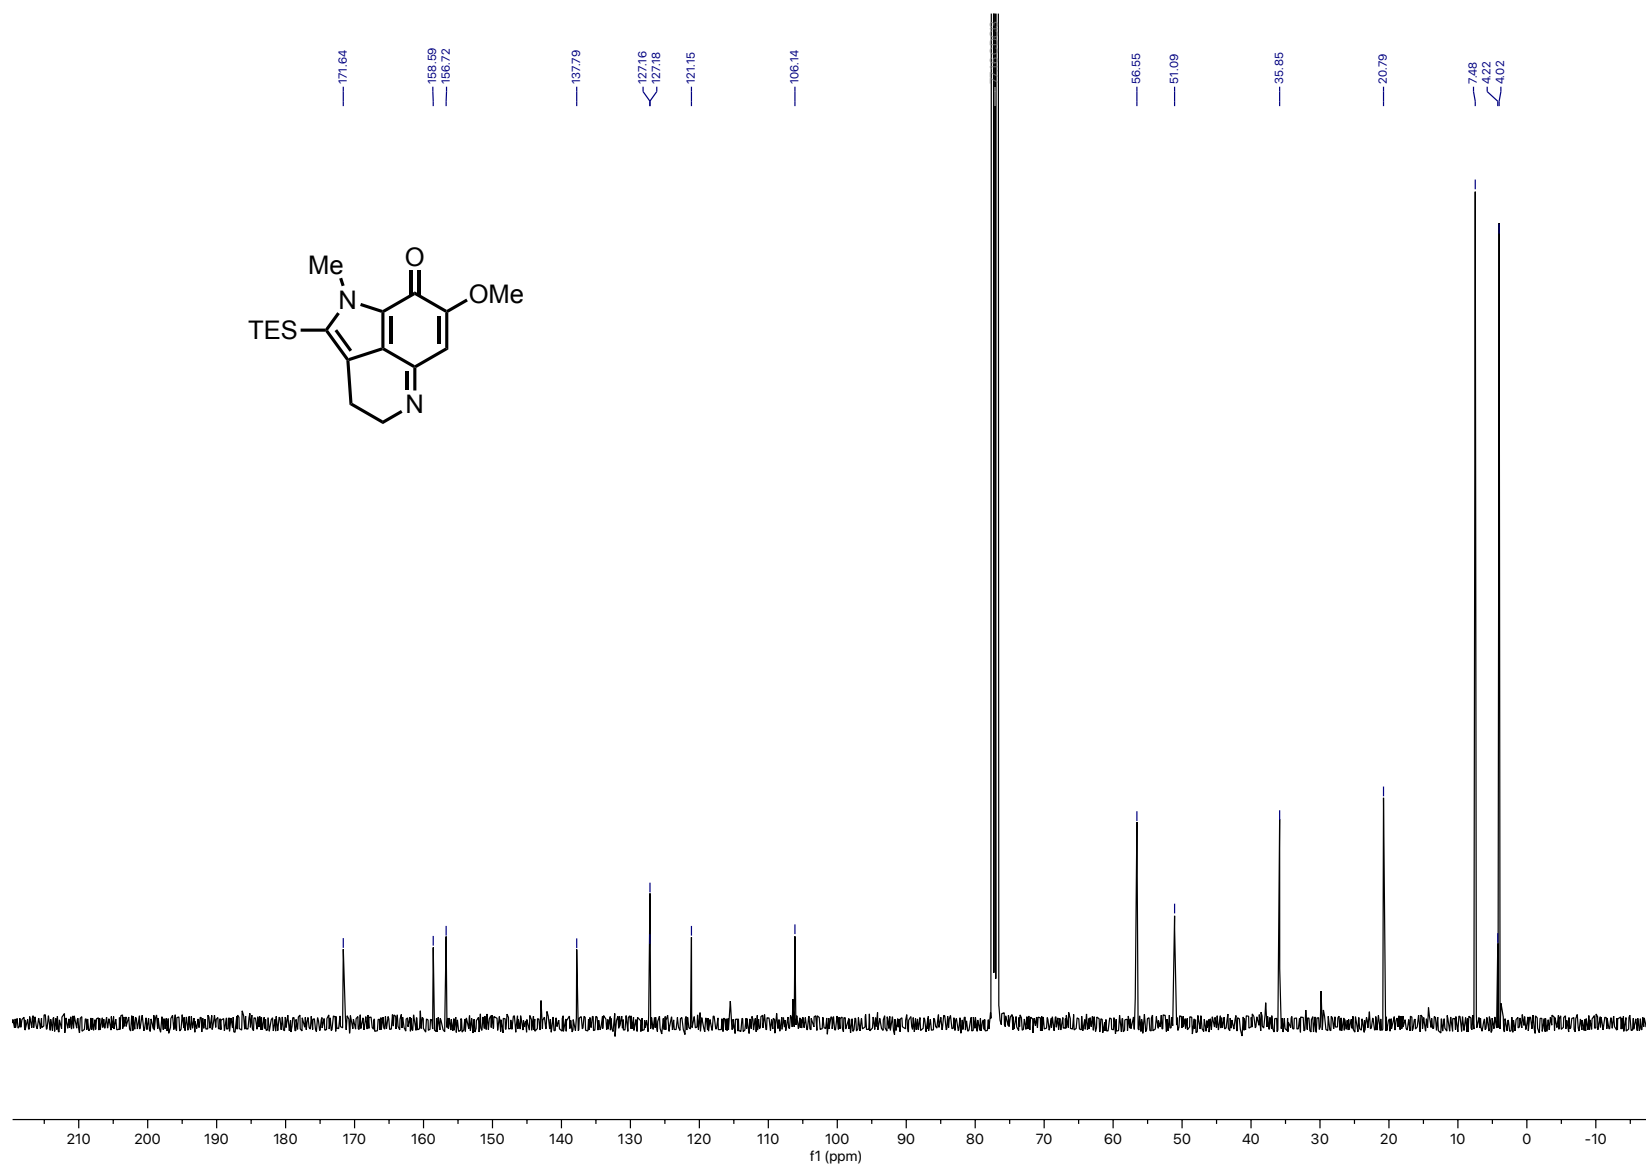

Figure S28:  $^{13}\text{C}$  NMR (101 MHz,  $\text{CDCl}_3$ ) for vinyllogous imidate **6b**

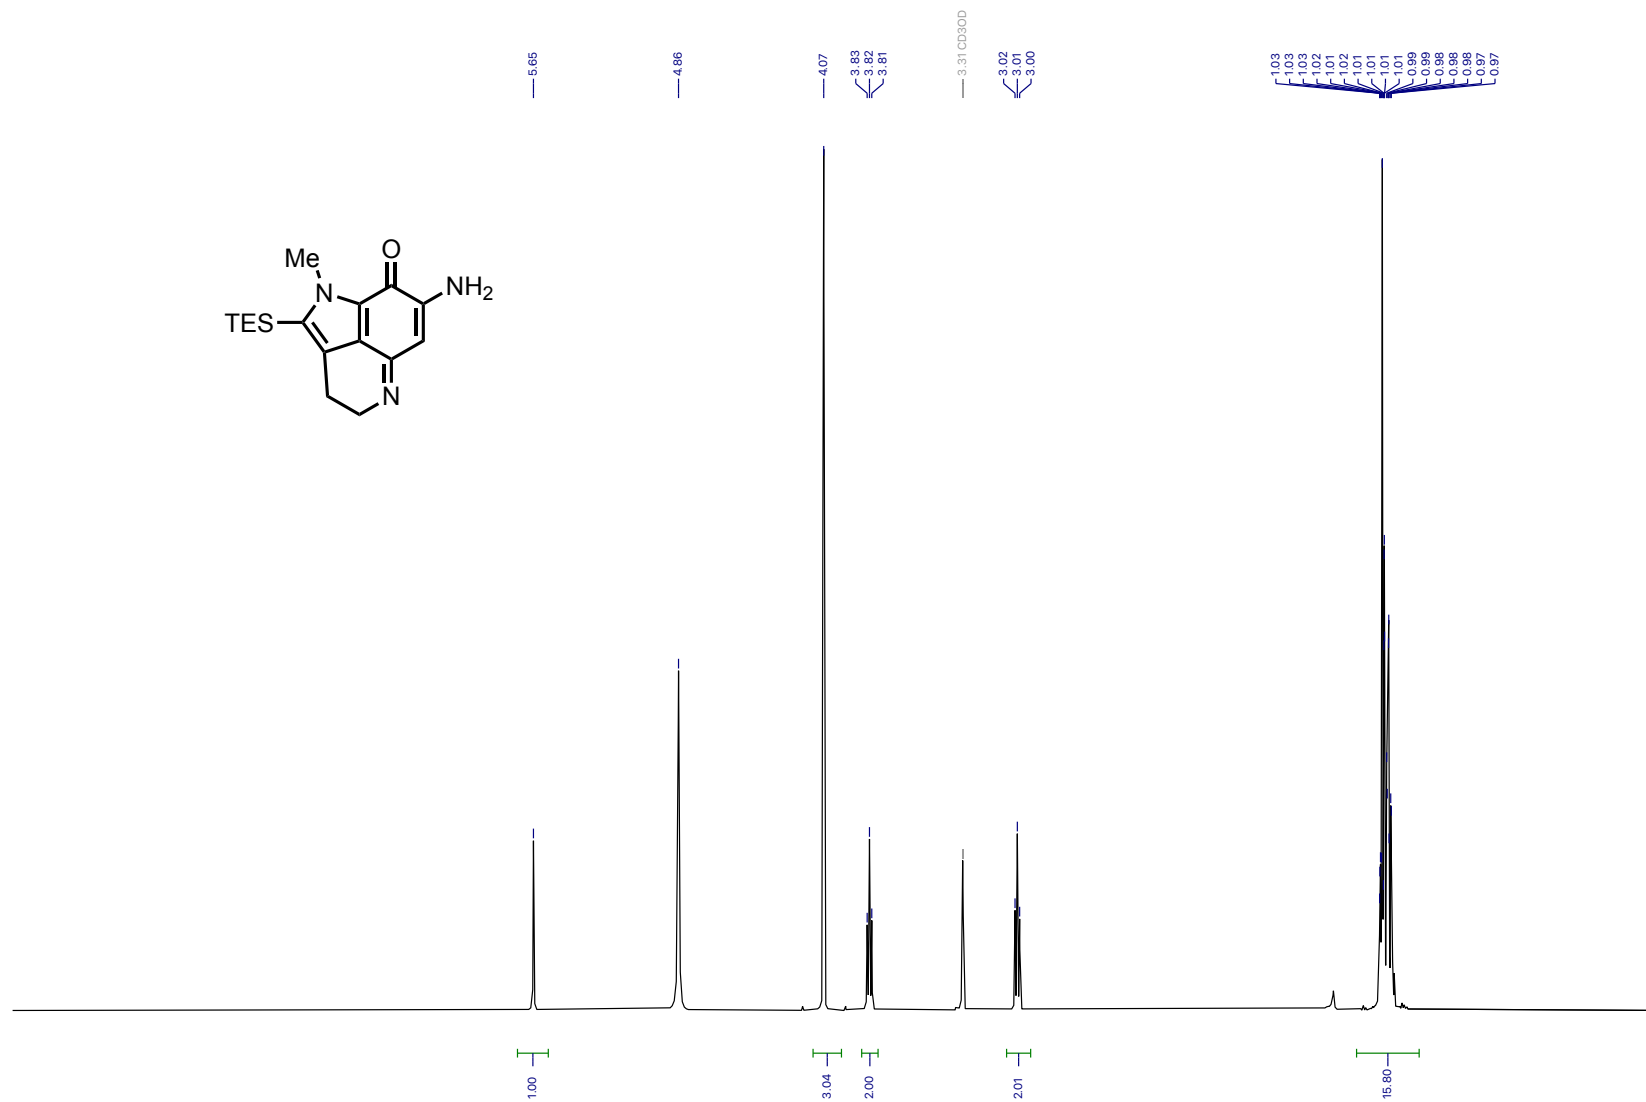

Figure S29: <sup>1</sup>H NMR (600 MHz, CD<sub>3</sub>OD) for vinyllogous amidine **22**

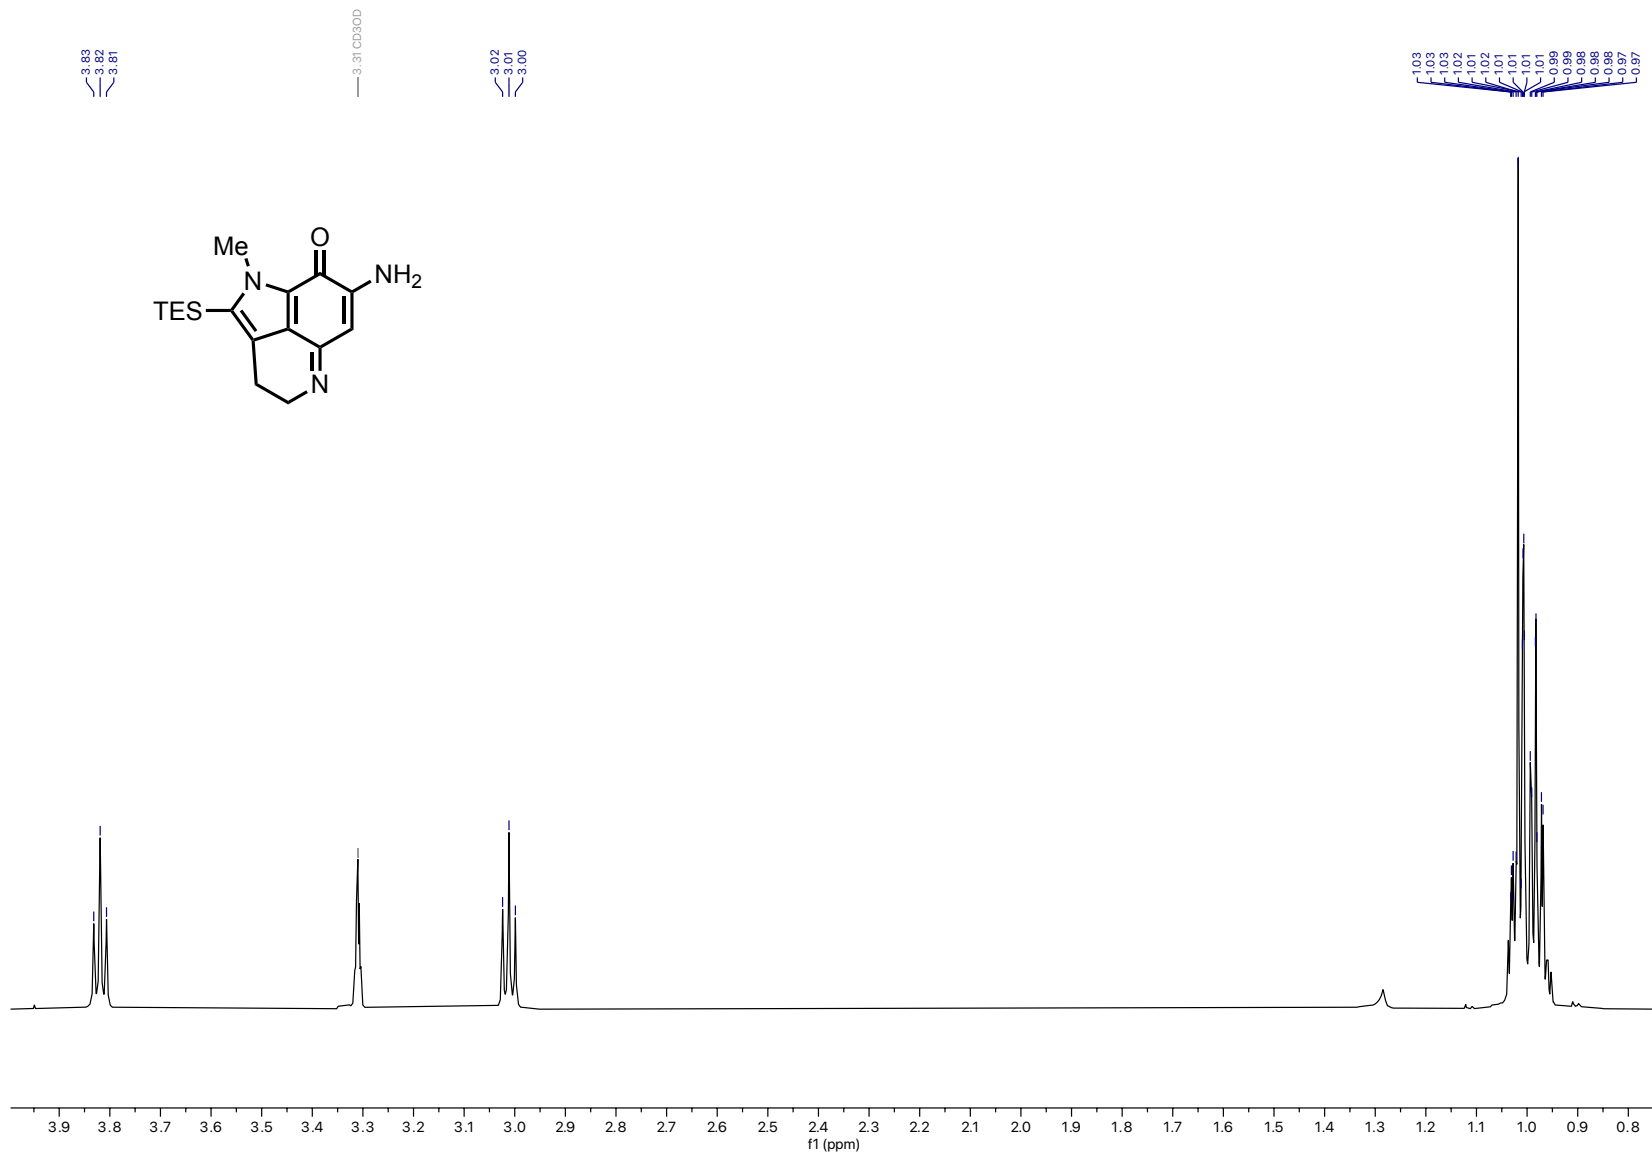

**Figure S30:** <sup>1</sup>H NMR (600 MHz, CD<sub>3</sub>OD) for vinyllogous amidine **22** (4.0-0.75 ppm inset)

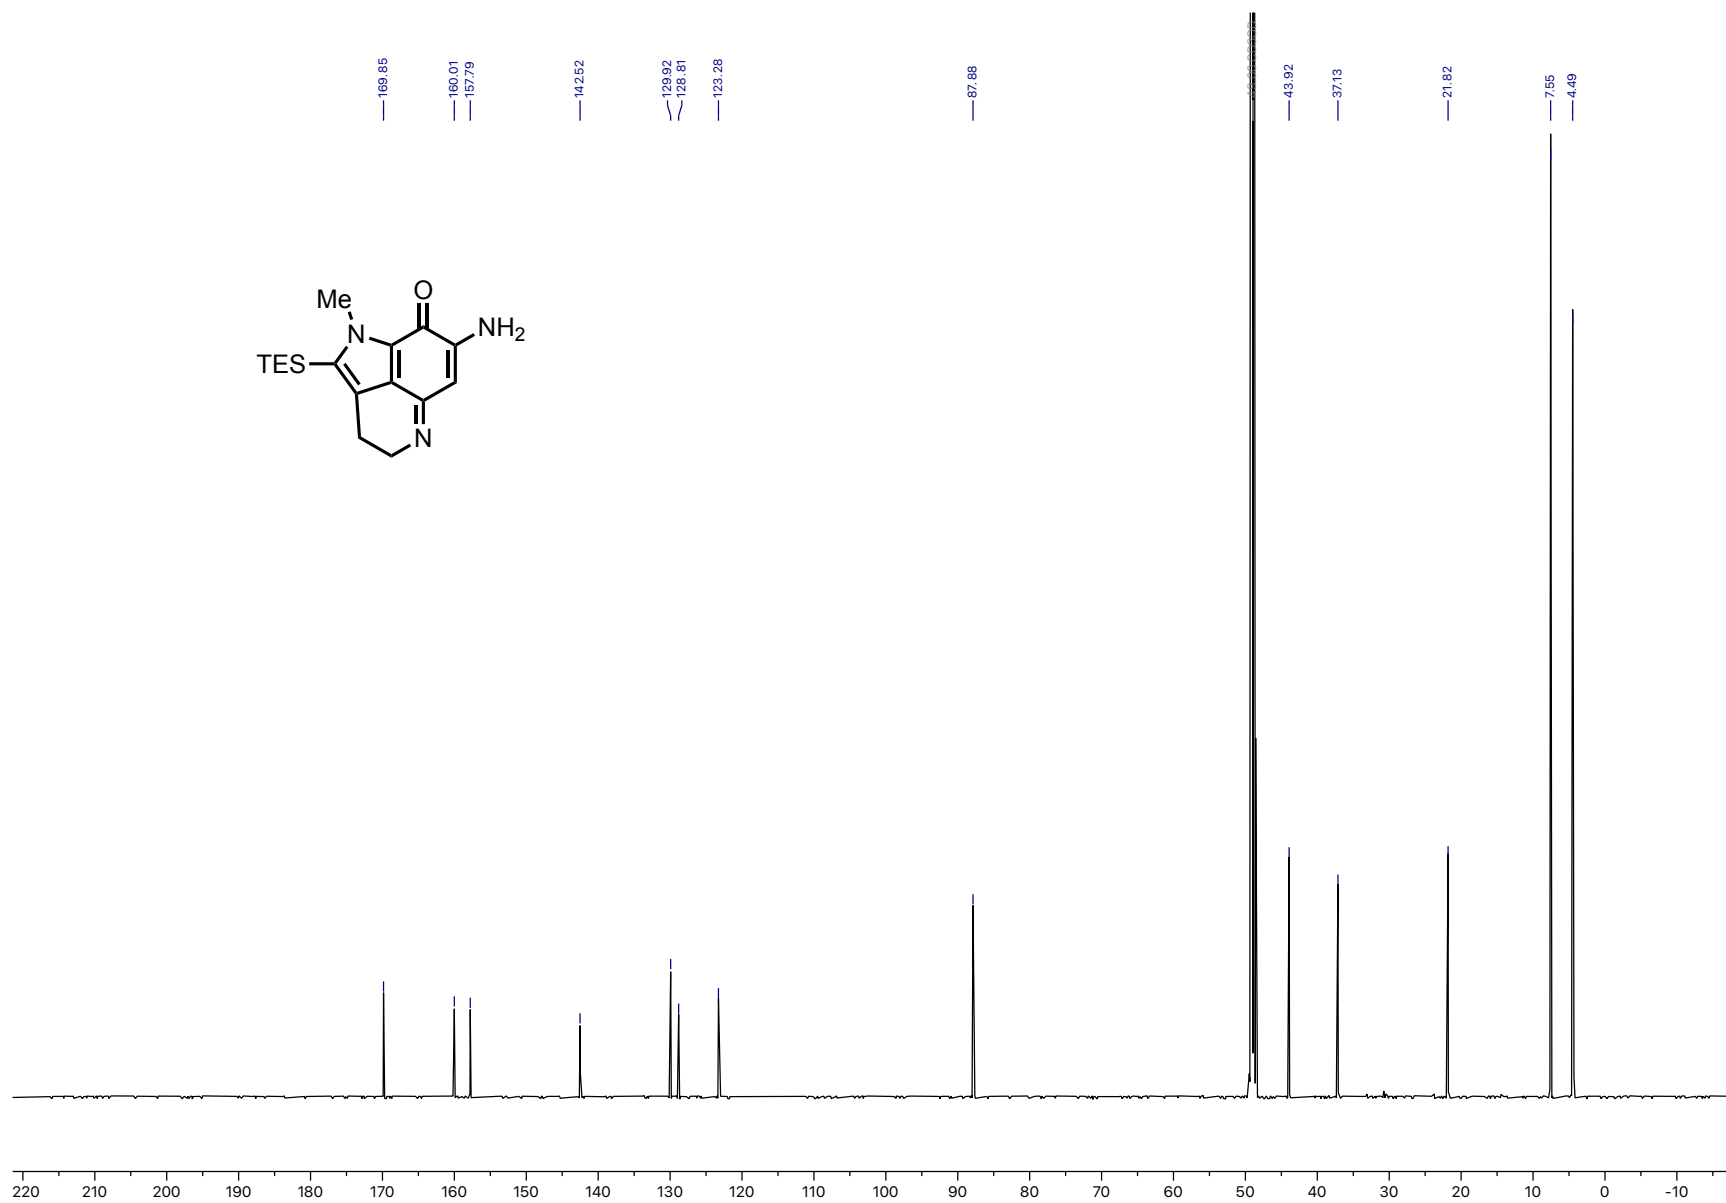

Figure S31: <sup>13</sup>C NMR (151 MHz, CD<sub>3</sub>OD) for vinylogous amidine 22

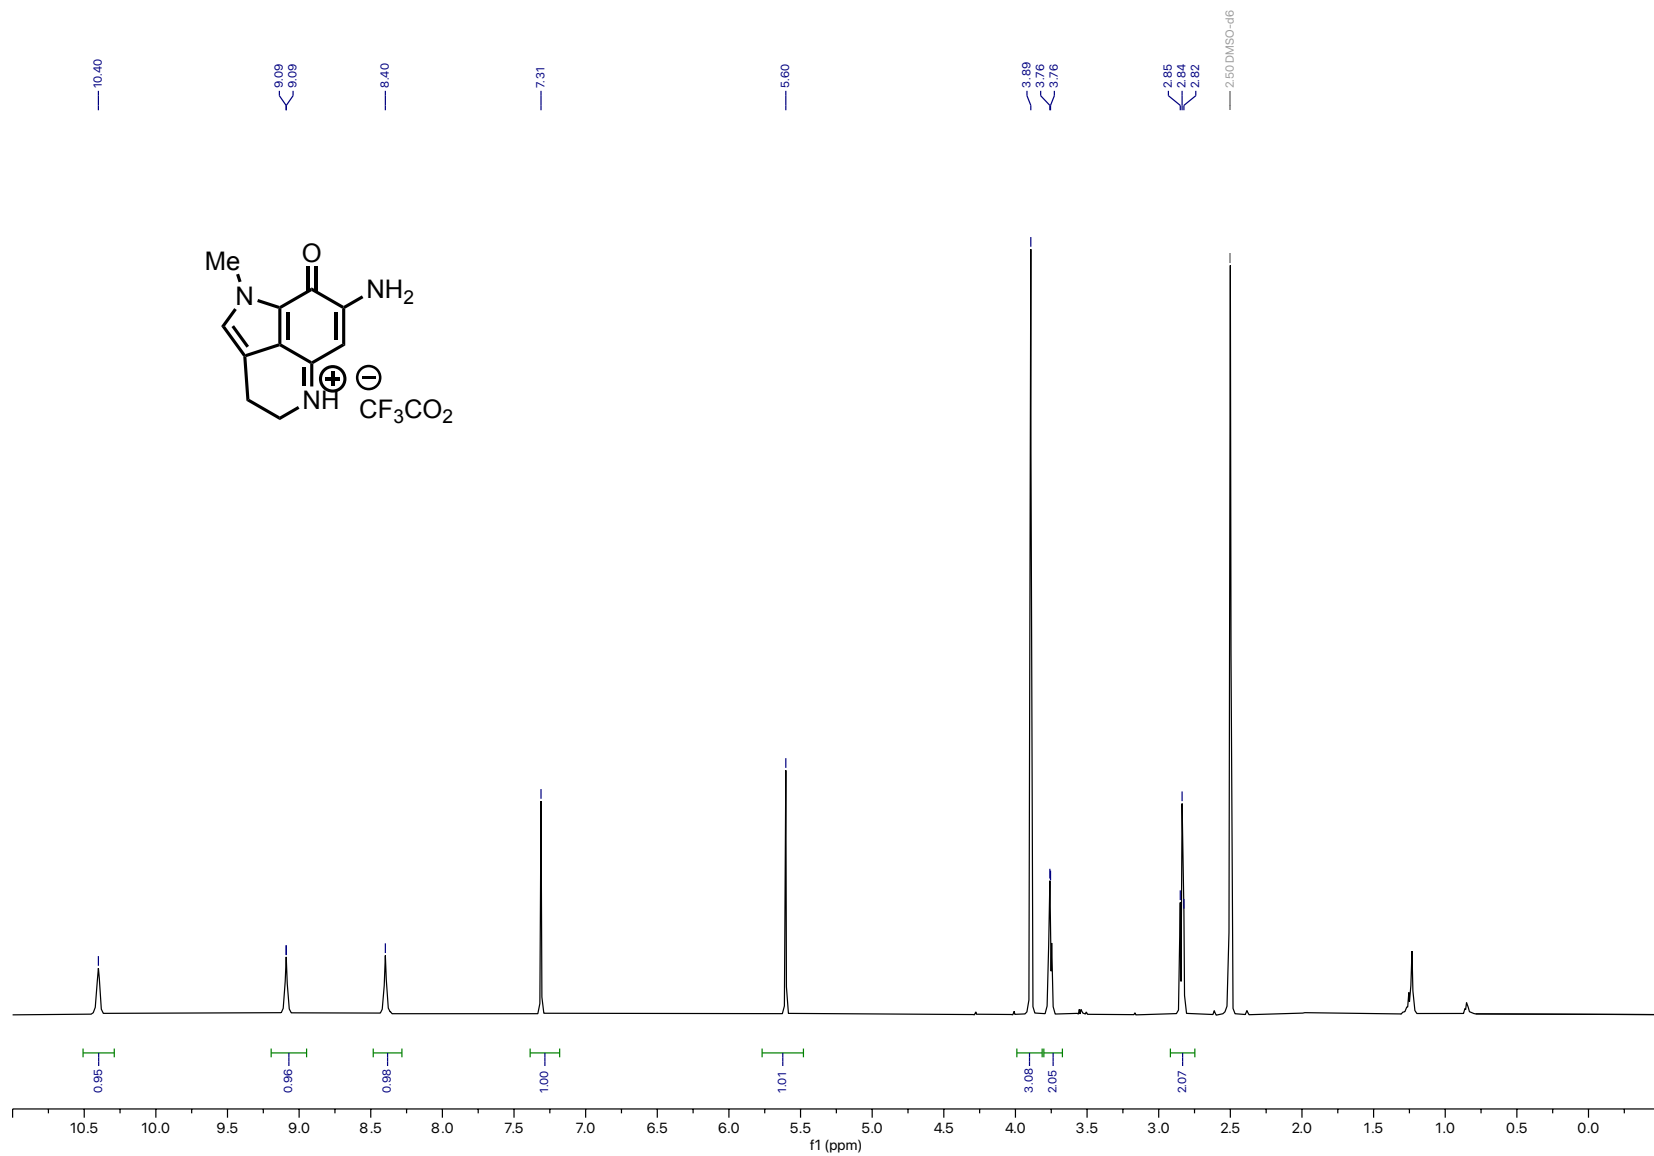

**Figure S32:** <sup>1</sup>H NMR (600 MHz, DMSO-d<sub>6</sub>) for makaluvamine A trifluoroacetate (**1**)



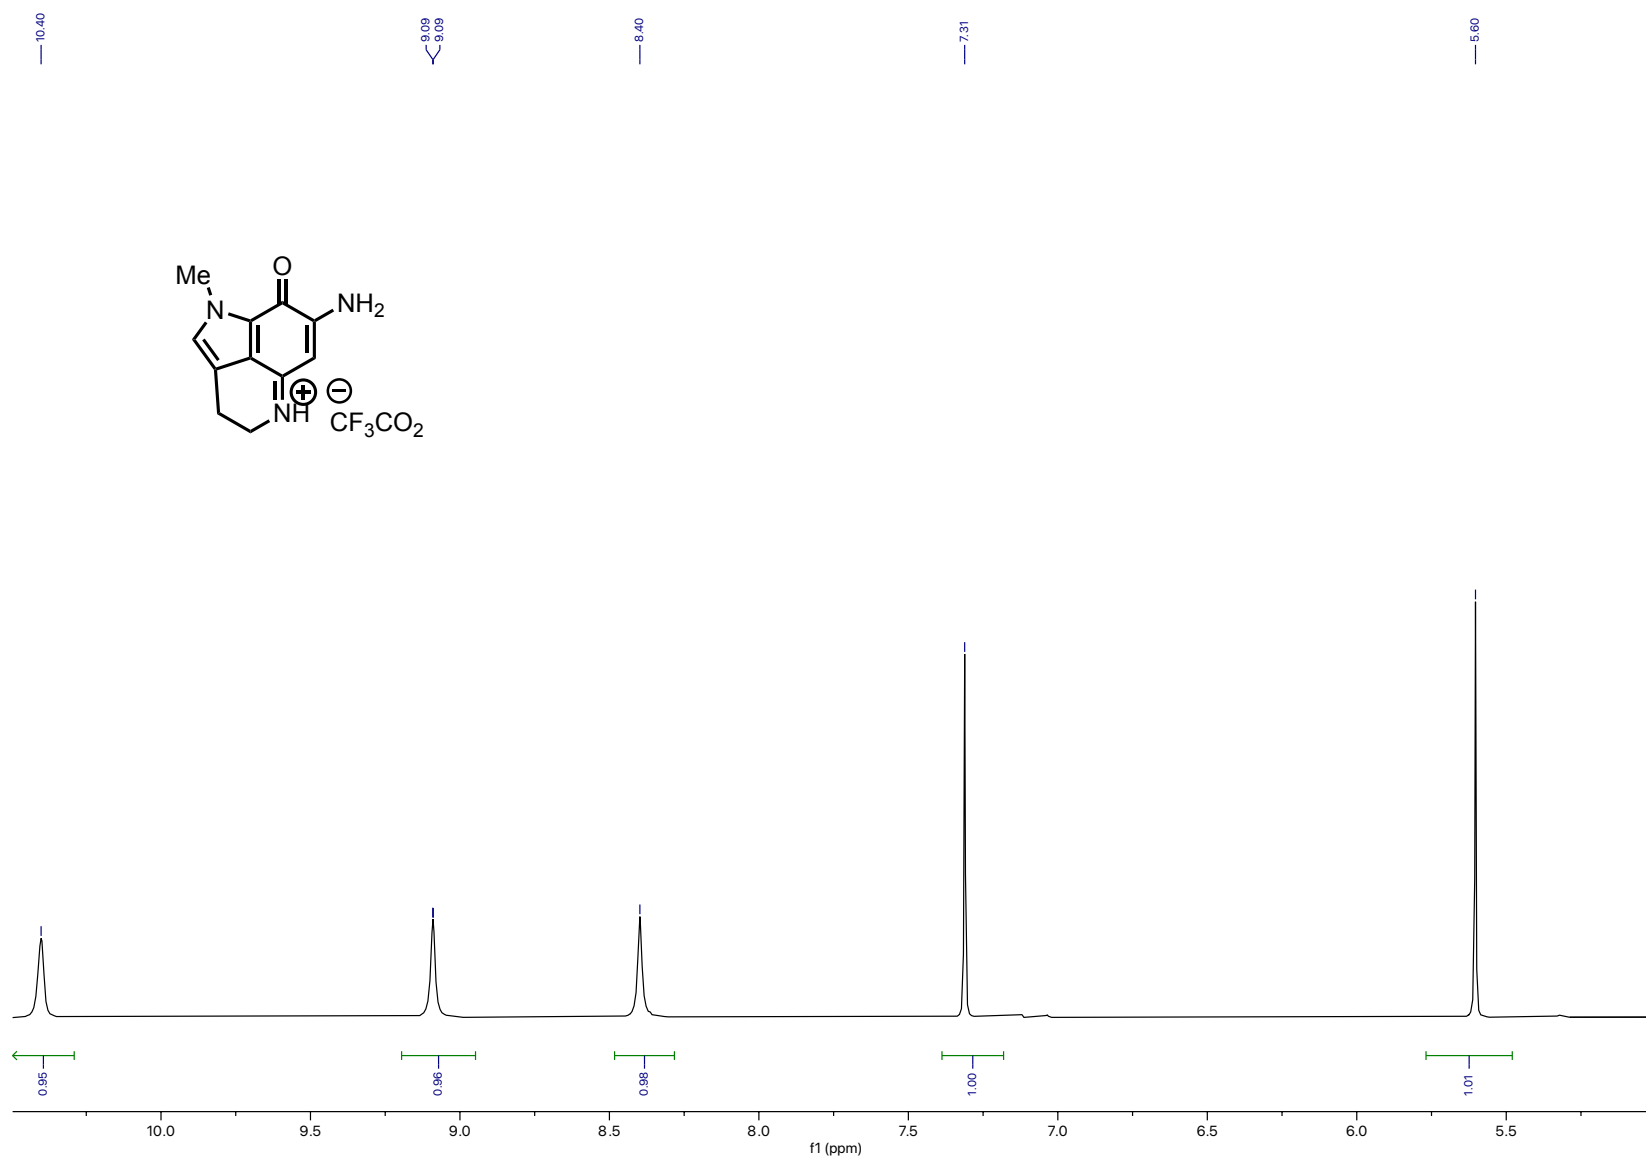

**Figure S33:** <sup>1</sup>H NMR (600 MHz, DMSO-d<sub>6</sub>) for makaluvamine A trifluoroacetate (**1**) (10.5-5.0 ppm inset)

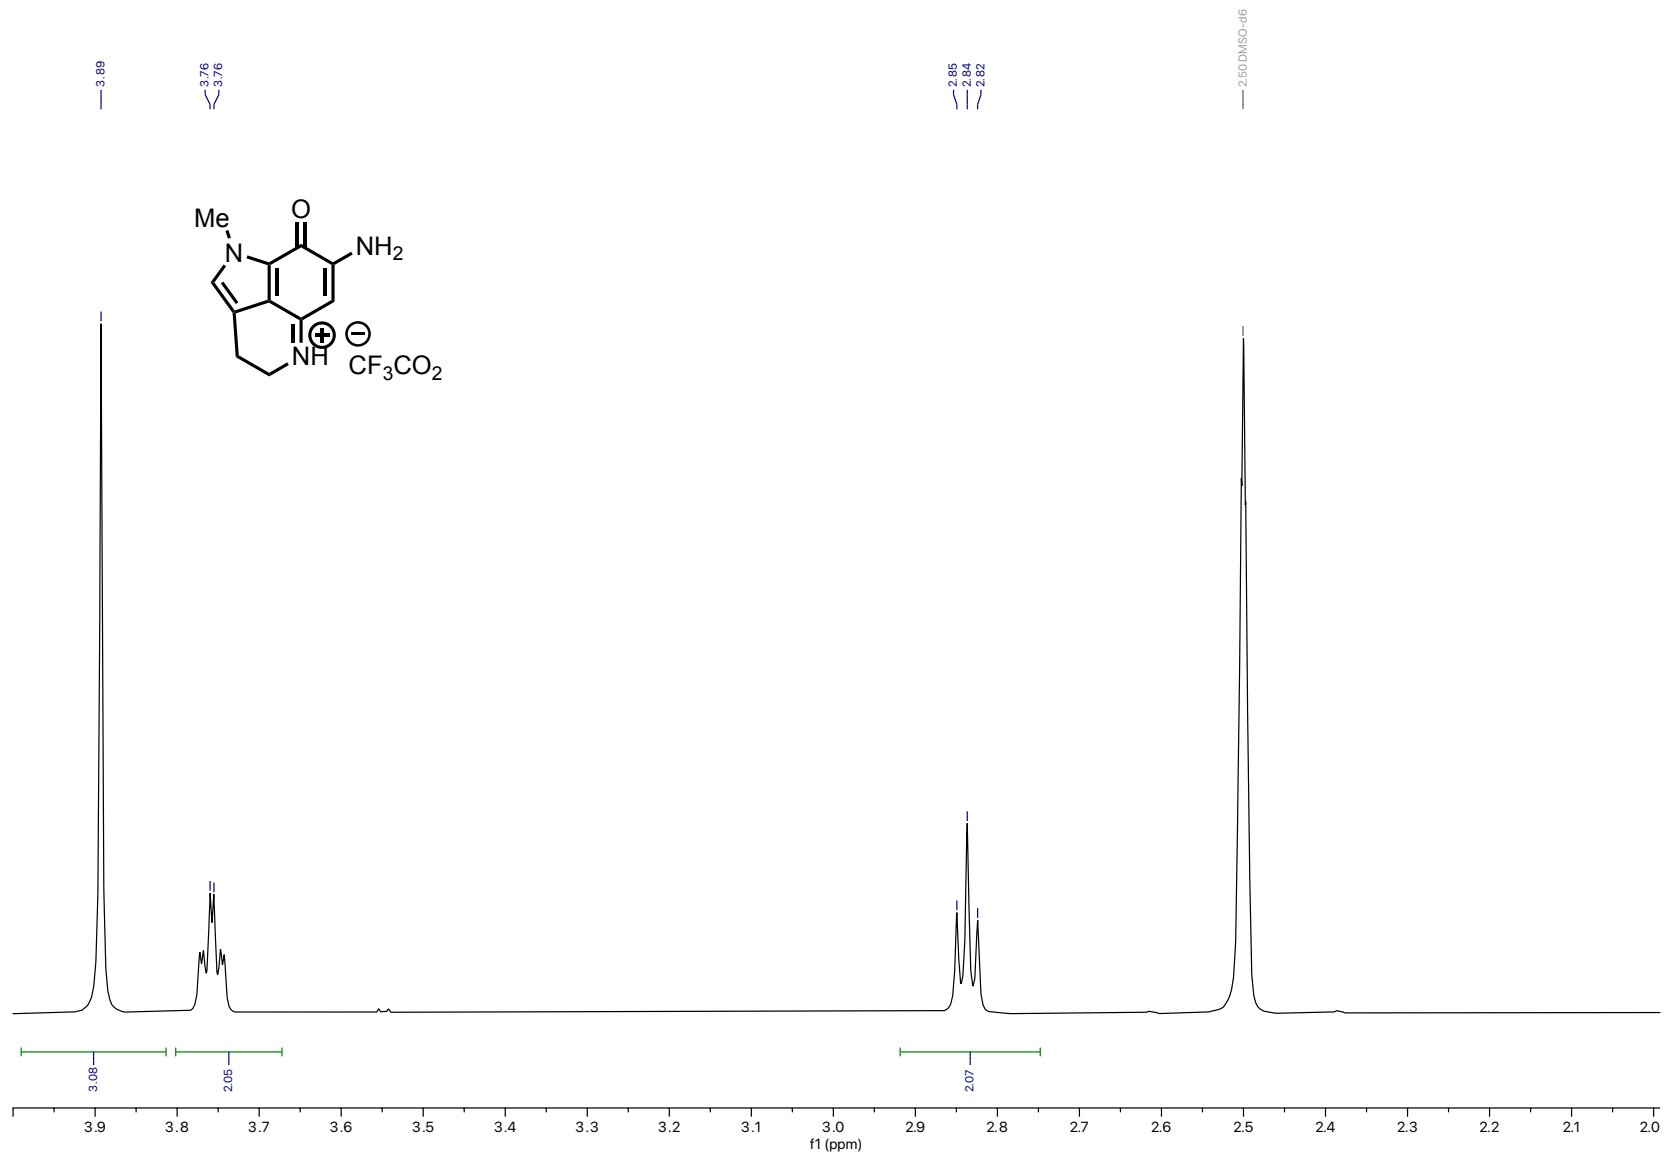

**Figure S34:** <sup>1</sup>H NMR (600 MHz, DMSO-d<sub>6</sub>) for makaluvamine A trifluoroacetate (**1**) (4.0-2.0 ppm inset)

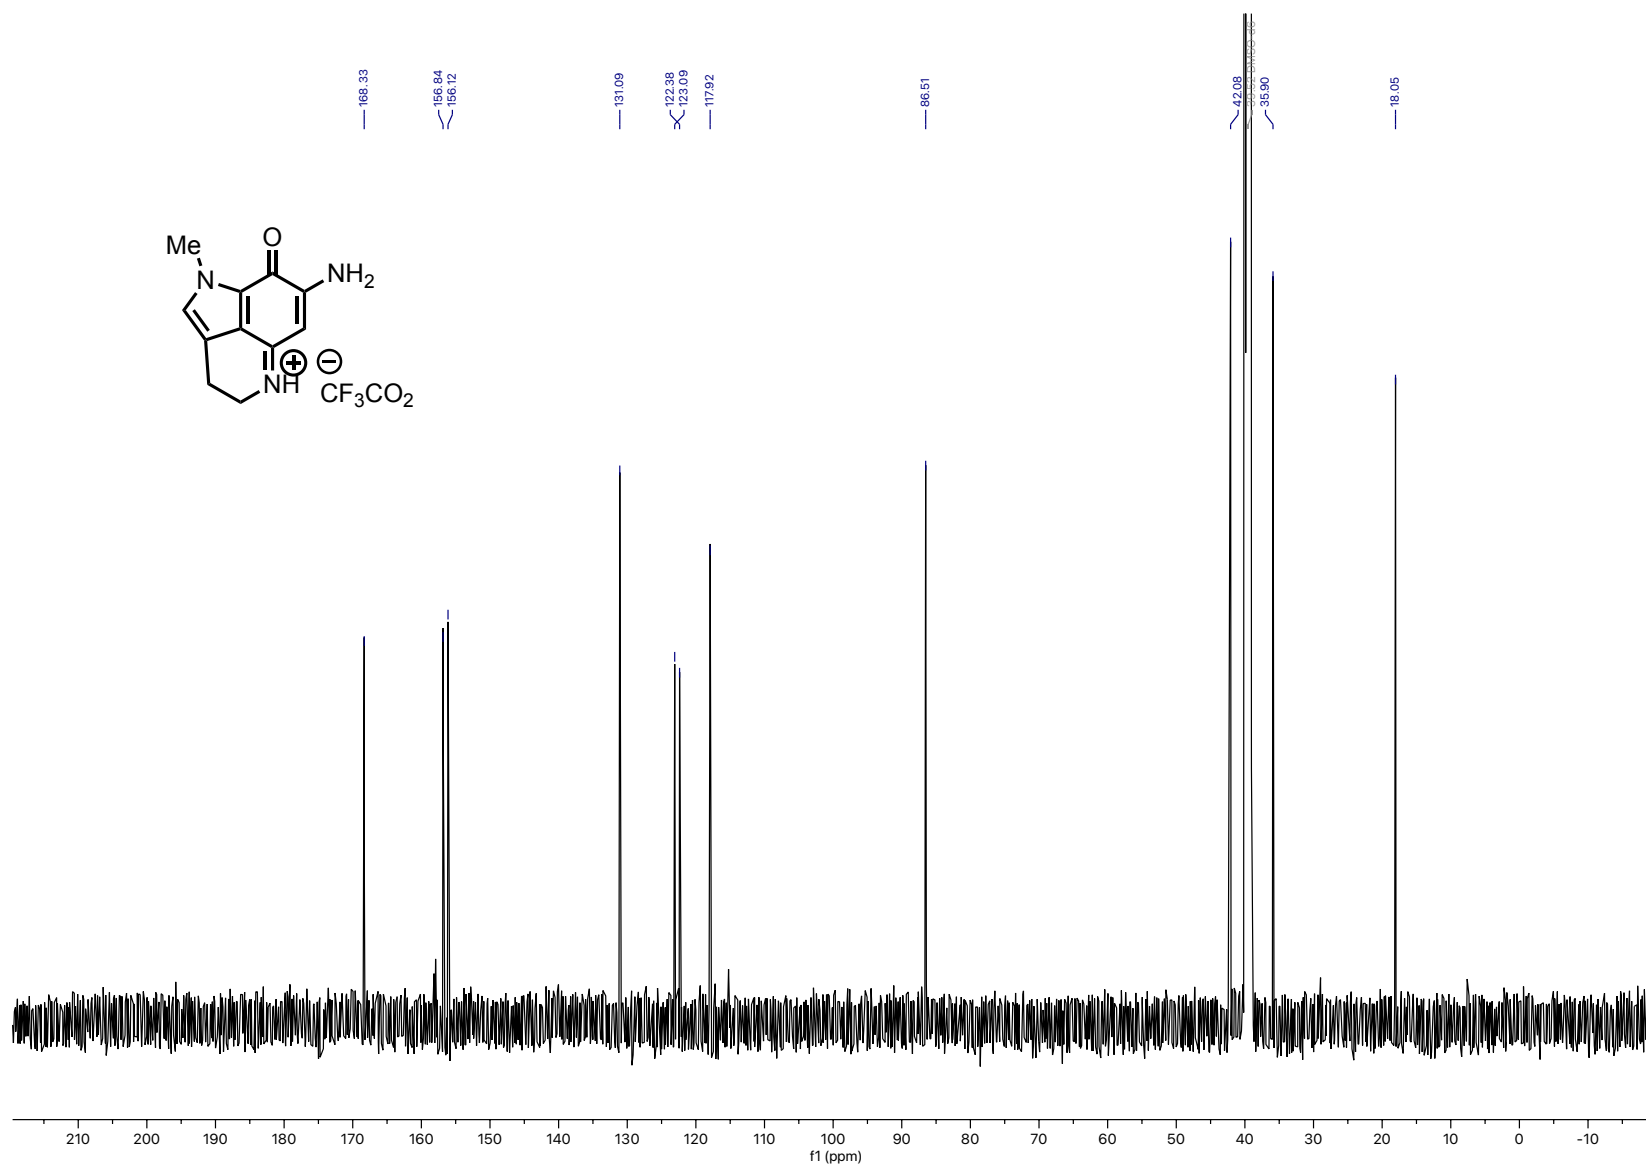

**Figure S35:**  $^{13}\text{C}$  NMR (151 MHz, DMSO- $d_6$ ) for makaluvamine A trifluoroacetate (**1**)

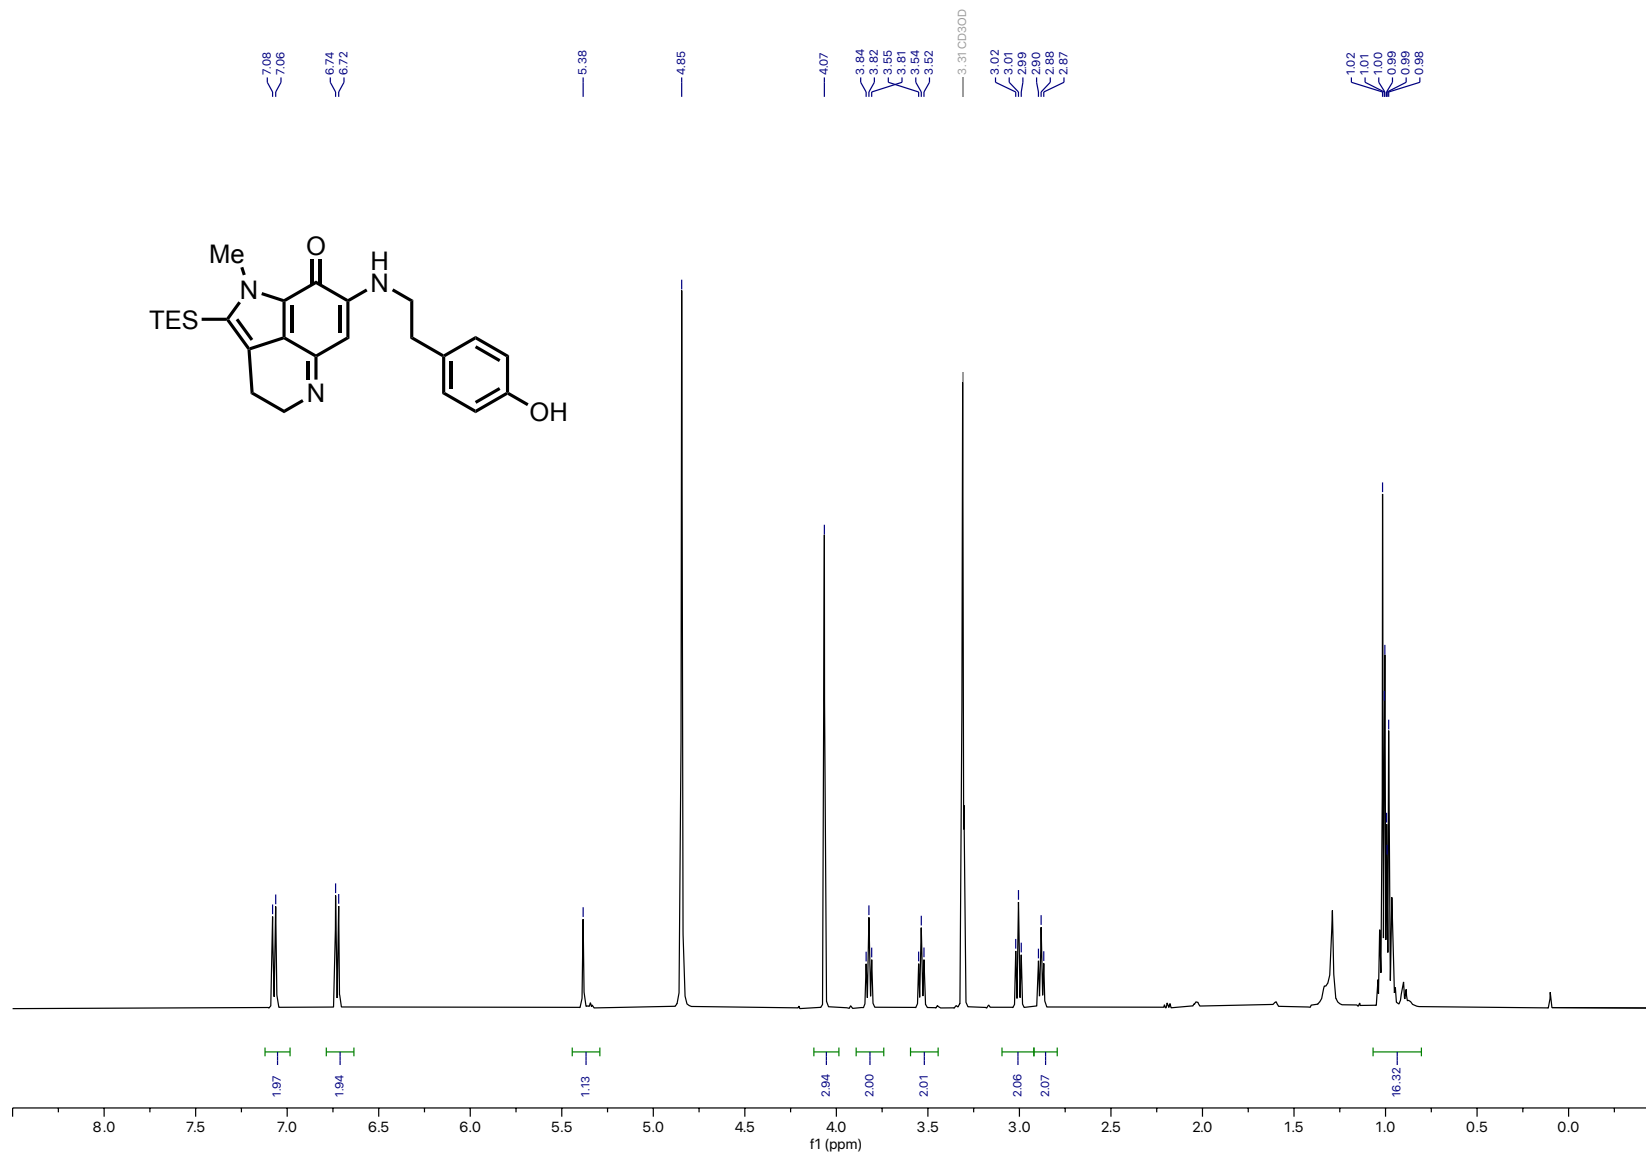

**Figure S36:** <sup>1</sup>H NMR (500 MHz, CD<sub>3</sub>OD) for secondary vinylgous amidine **23**

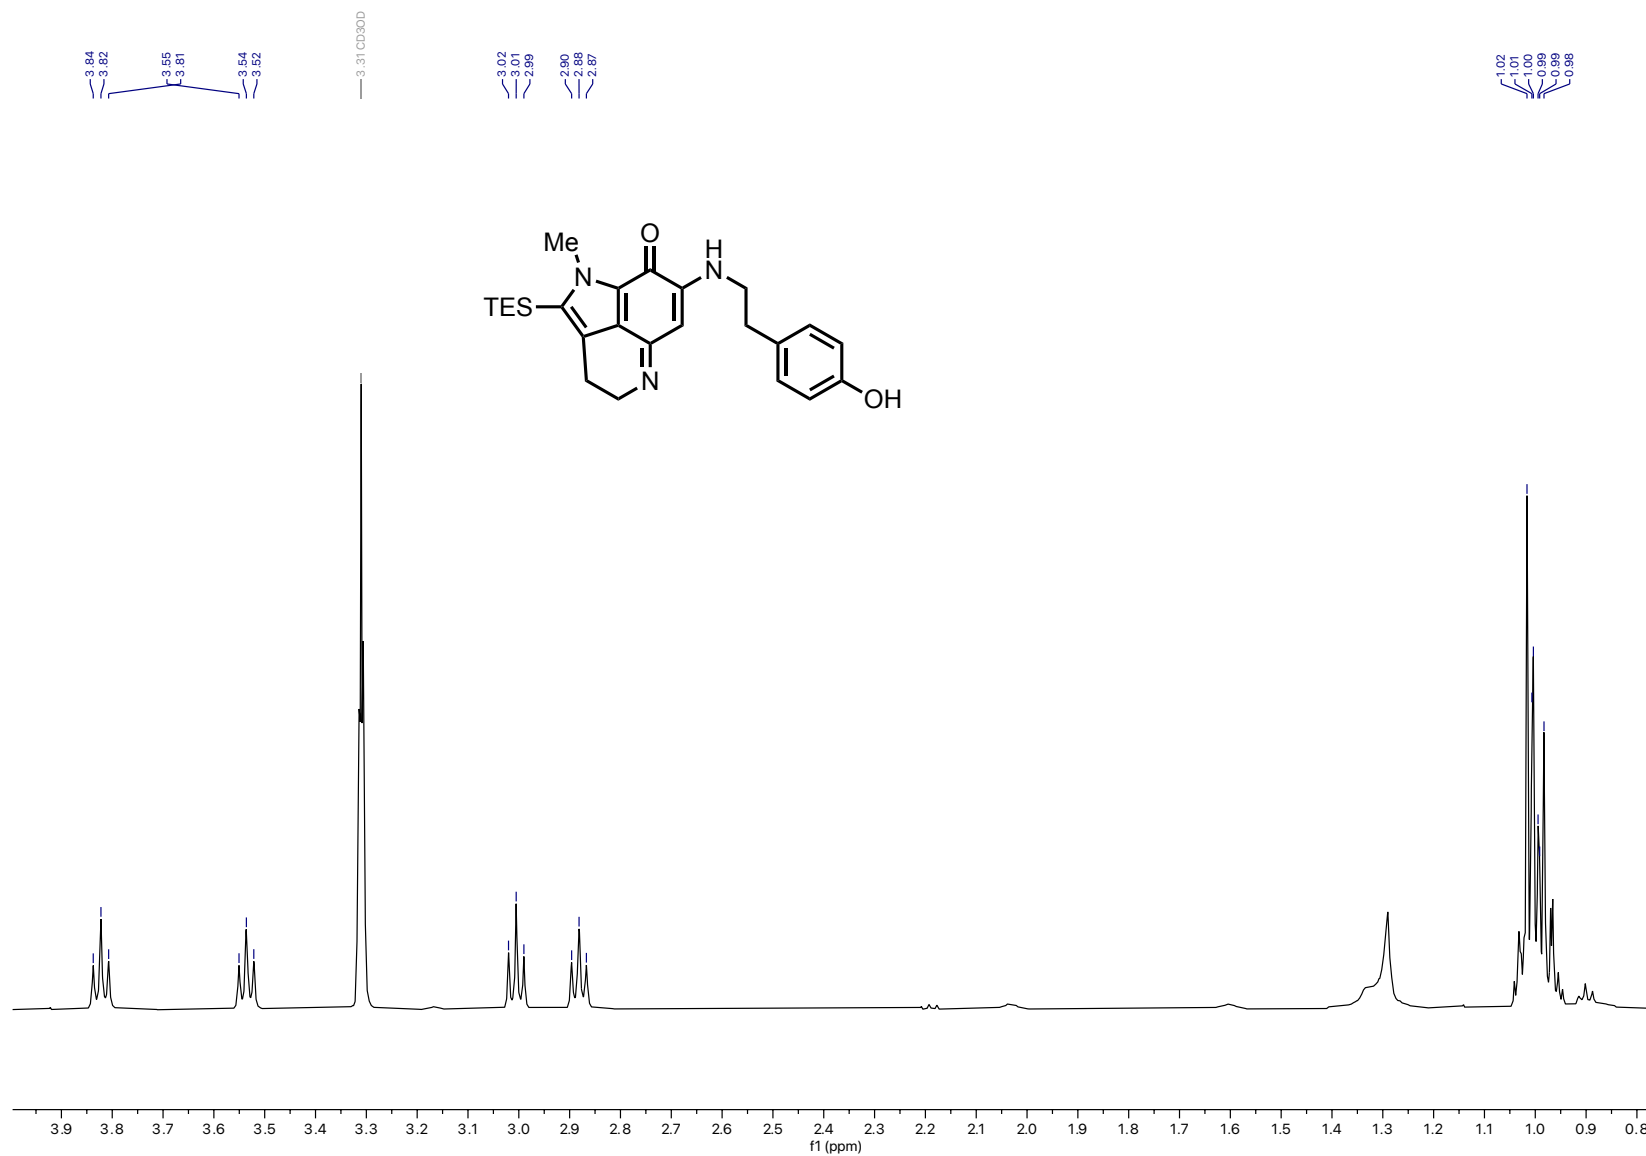

**Figure S37:** <sup>1</sup>H NMR (500 MHz, CD<sub>3</sub>OD) for secondary vinylogous amidine **23** (4.0- 0.75 ppm inset)

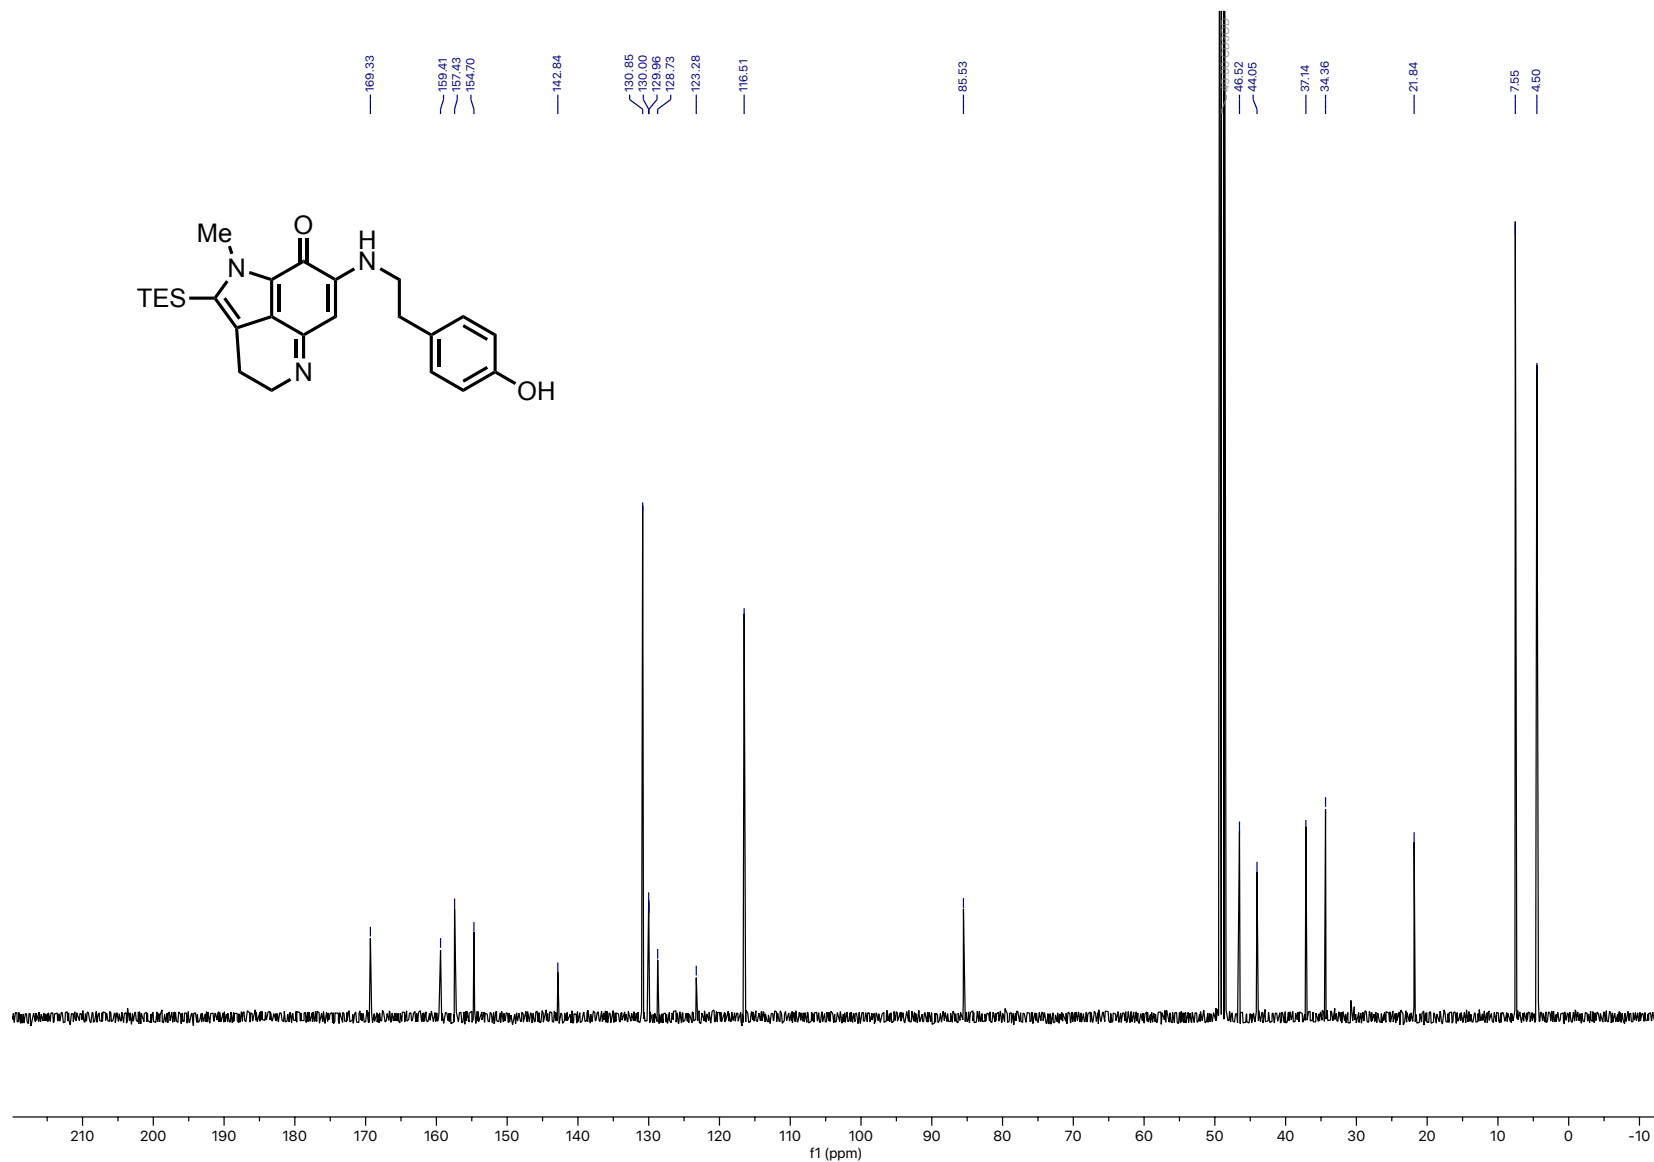

**Figure S38:** <sup>13</sup>C NMR (126 MHz, CD<sub>3</sub>OD) for secondary vinylogous amidine **23**

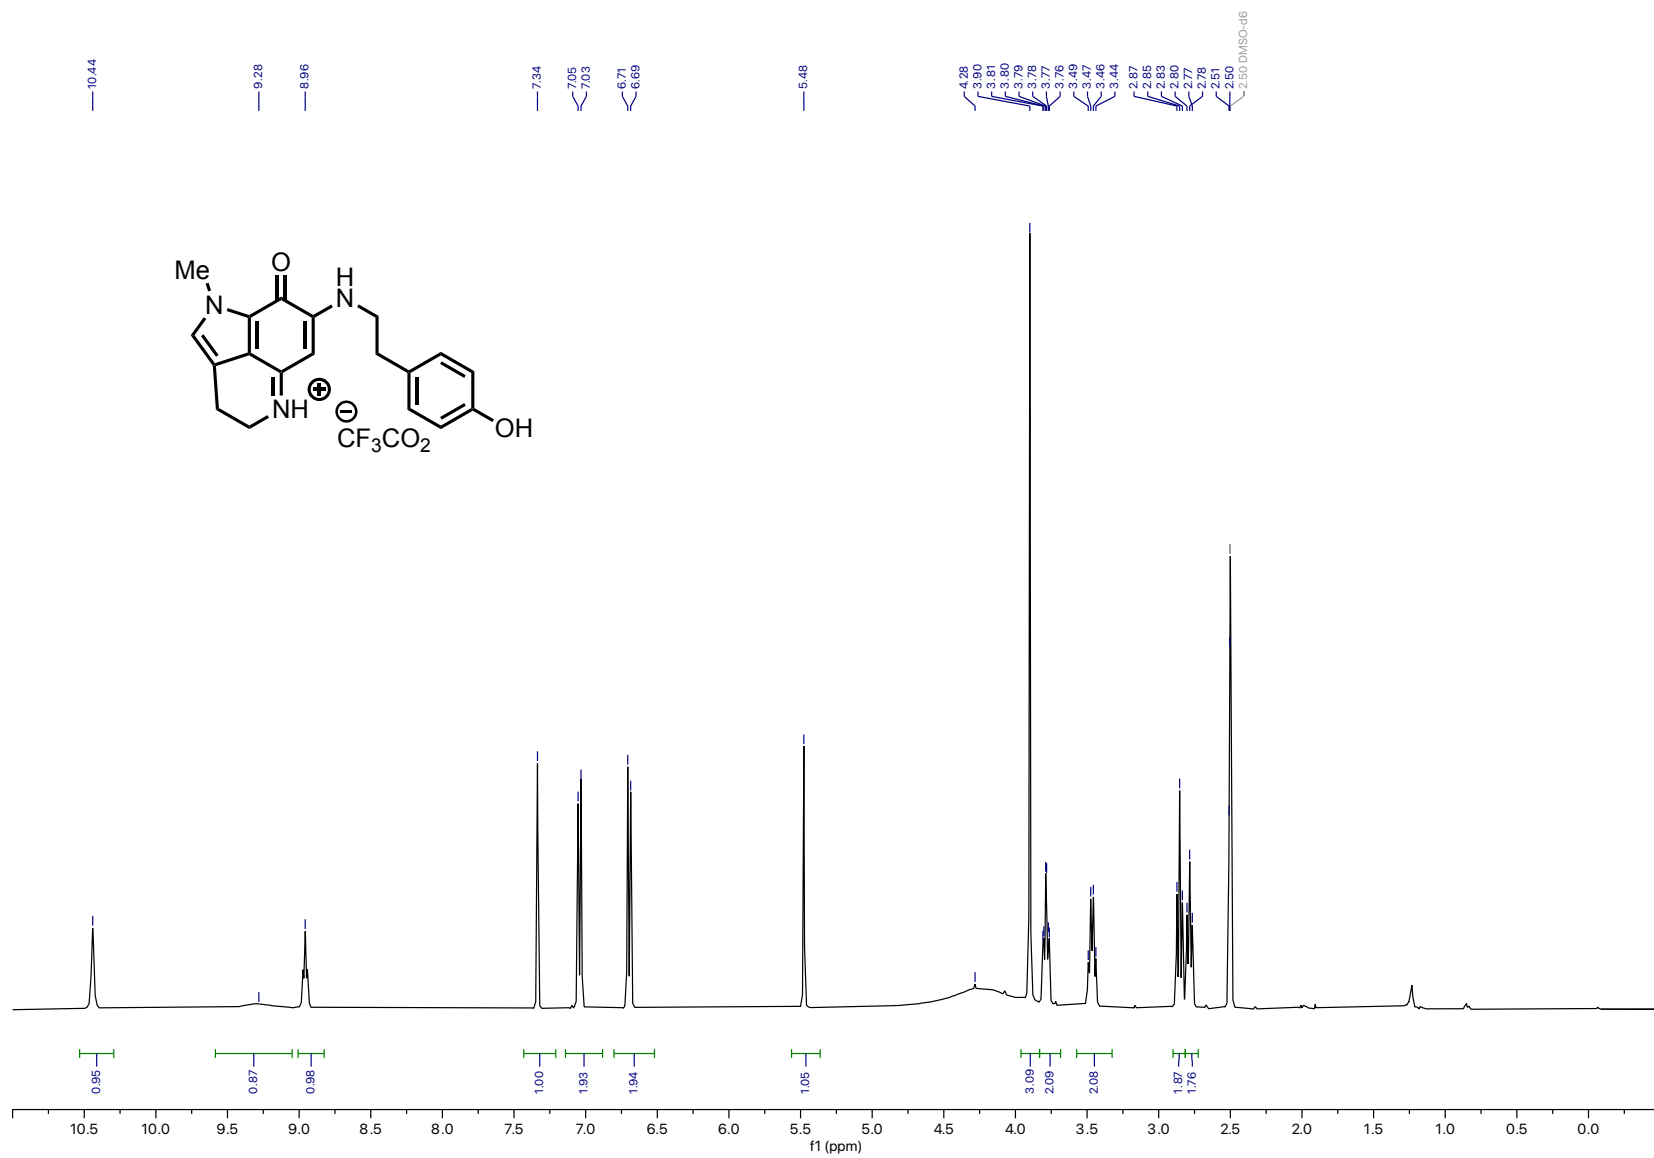

**Figure S39:** <sup>1</sup>H NMR (500 MHz, DMSO-d<sub>6</sub>) for makaluvamine K trifluoroacetate (**4**)

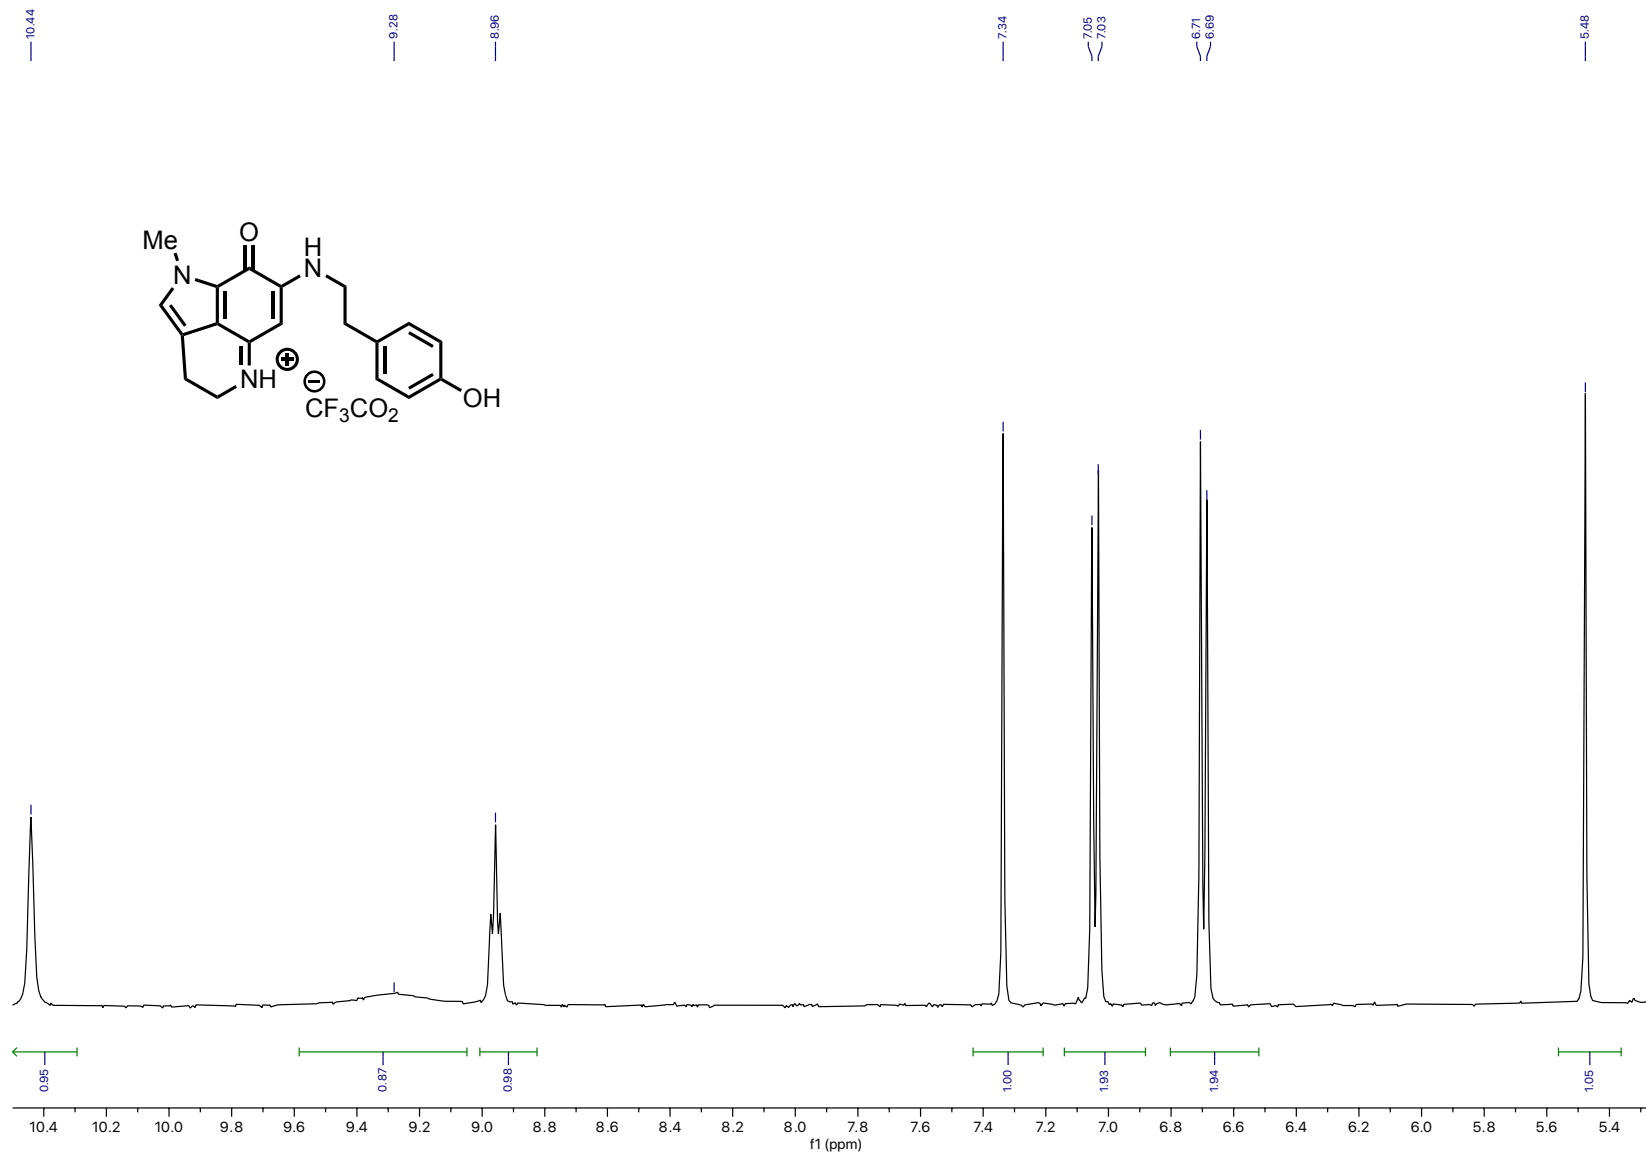

Figure S40: <sup>1</sup>H NMR (500 MHz, DMSO-d<sub>6</sub>) for makaluvamine K trifluoroacetate (**4**) (10.5-5.25 ppm inset)



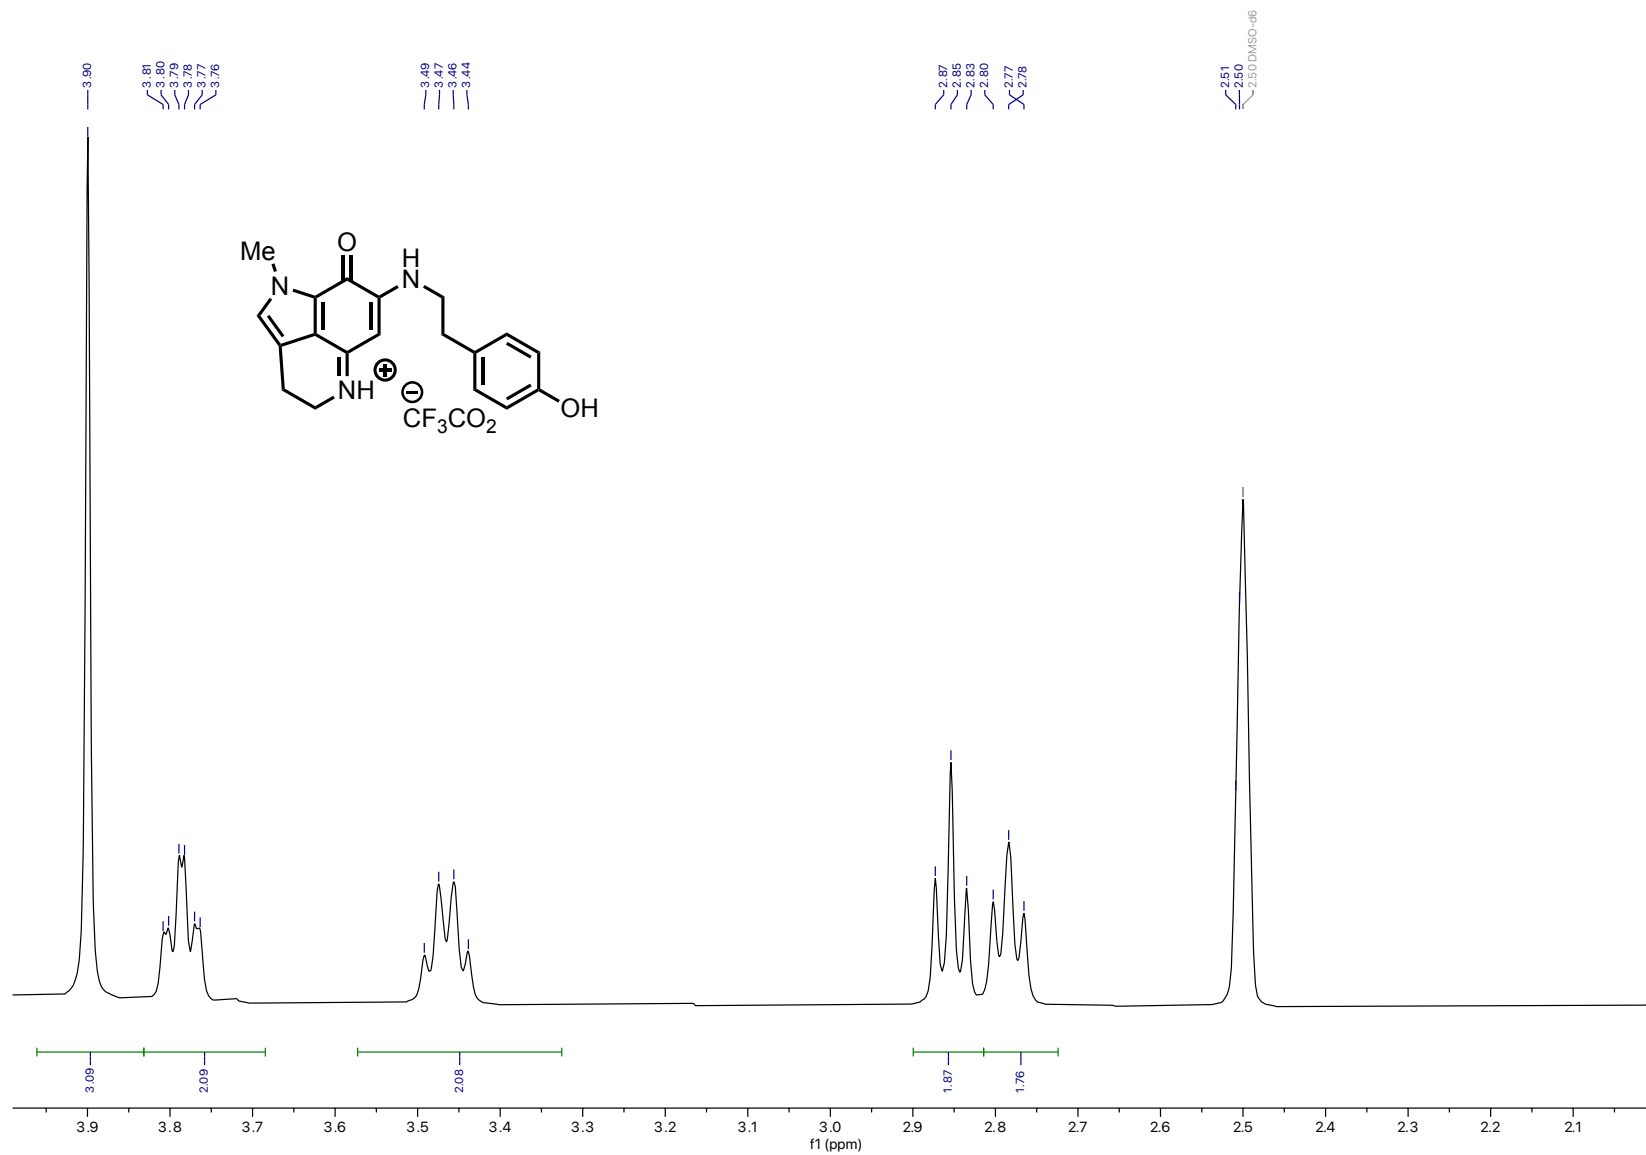

Figure S41: <sup>1</sup>H NMR (500 MHz, DMSO-d<sub>6</sub>) for makaluvamine K trifluoroacetate (4) (4.0-2.0 ppm inset)

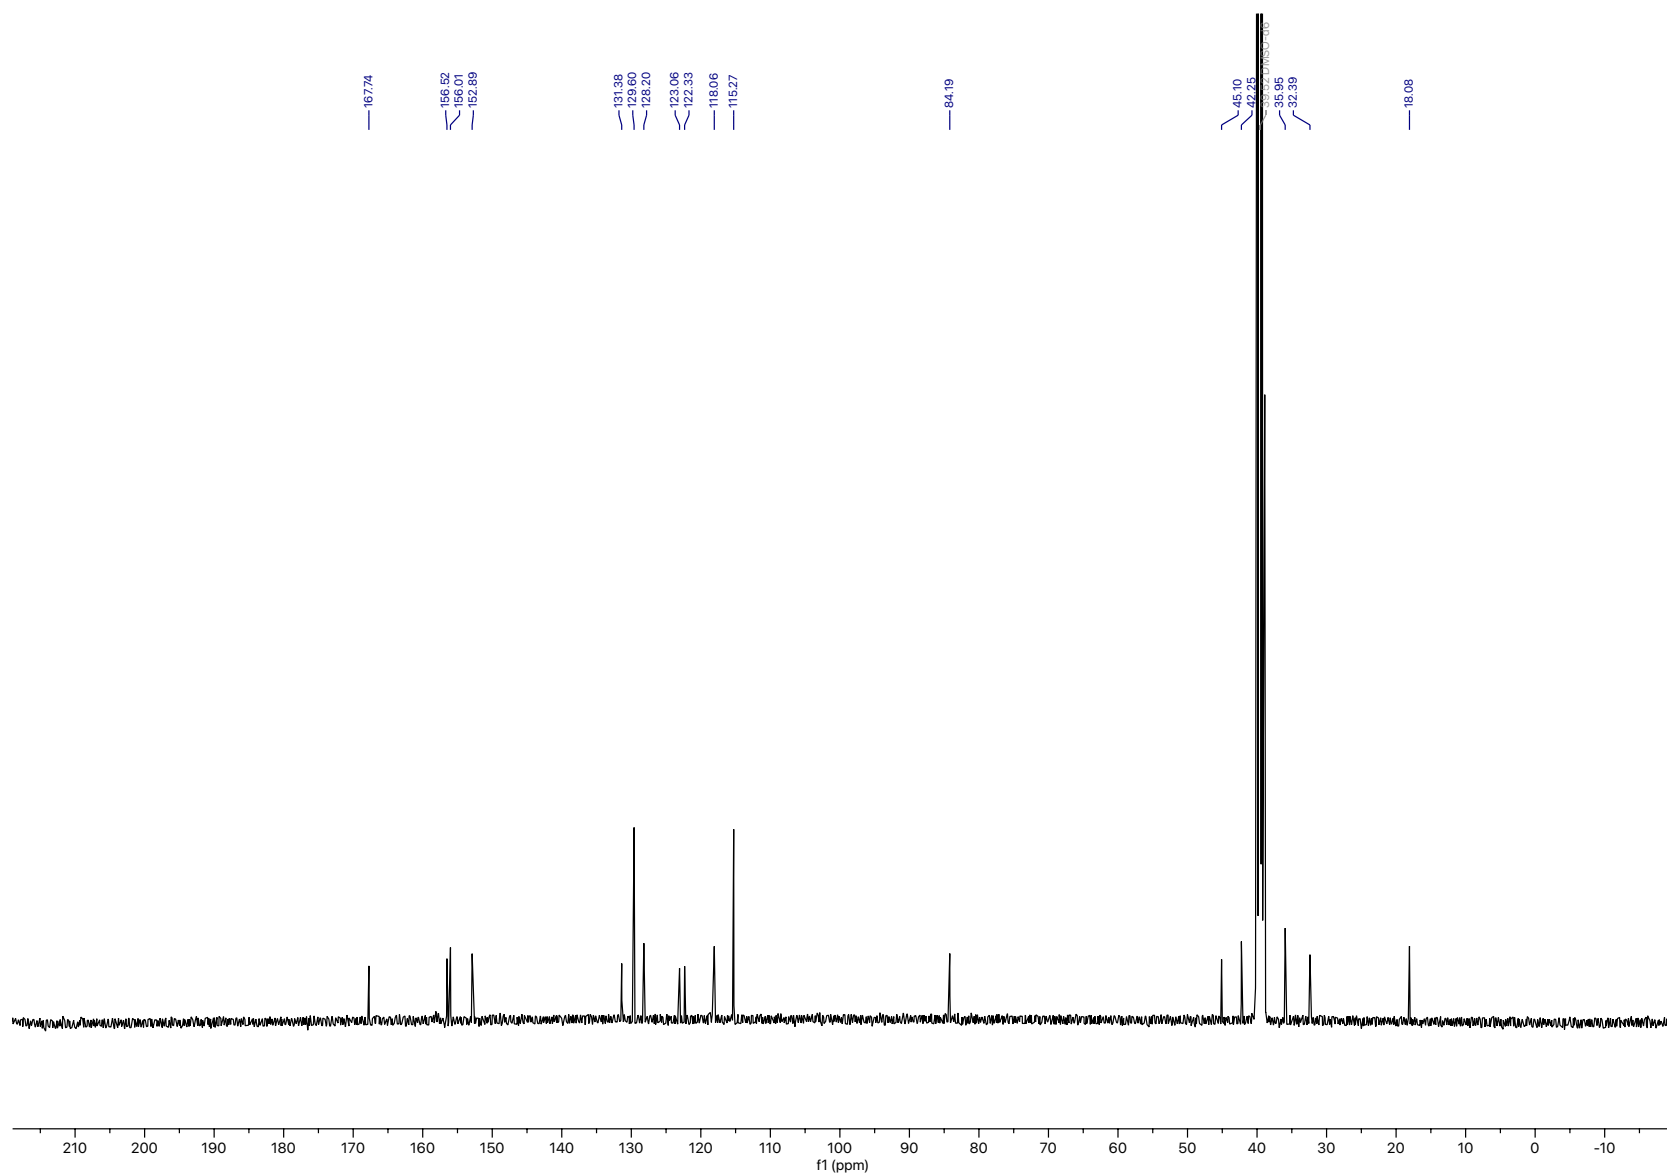

**Figure S42:**  $^{13}\text{C}$ NMR (125 MHz, DMSO- $d_6$ ) for makaluvamine K trifluoroacetate (**4**)

## VI. REFERENCES

- 1) Sneddon, H. F.; Gaunt, M. J.; Ley, S. V.; *Org. Lett.* **2003**, *5*, 1147-1150.
- 2) Radisky, D. C.; Radisky, E. S.; Barrows, L. R.; Copp, B. R.; Kramer, R. A.; Ireland, C. M. *J. Am. Chem. Soc.* **1993**, *115*, 1632-1638.
- 3) Schmidt, E. W.; Harper, M. K.; Faulkner, D. J. *Nat. Prod.* **1995**, *58*, 1861-1867.
